# Supplementary material for: Identification of Major QTLs Associated With First Pod Height and Candidate Gene Mining in Soybean
Source: Front Plant Sci. 2018 Sep 19;9:1280. doi: 10.3389/fpls.2018.01280 (PMC6157441; doi:10.3389/fpls.2018.01280)
Supplement: Supplementary file 9 [file Table_9.XLSX]

## Sheet: Integrated_Function.anno
Table S9: Gene annotation information table.
#GeneID	PF00069	PTHR12209	KOG3087	2.7.11.1	K08851	GO:0006468,GO:0005524,GO:0004672,GO:0004674	AT5G26110.1		Protein kinase superfamily protein
Glyma.02G191000	PF03372	PTHR22748,PTHR22748:SF8	KOG1294	4.2.99.18	K01142	GO:0006281,GO:0004518	AT2G41460.1	ARP	apurinic endonuclease-redox protein
Glyma.02G191100	PF03372	PTHR22748,PTHR22748:SF8	KOG1294	4.2.99.18	K01142	GO:0006281,GO:0004518	AT2G41460.1	ARP	apurinic endonuclease-redox protein
Glyma.02G191100	PF03372	PTHR22748,PTHR22748:SF8		4.2.99.18		GO:0006281,GO:0004518	AT2G41460.1	ARP	apurinic endonuclease-redox protein
Glyma.02G191100	PF03372	PTHR22748,PTHR22748:SF8		4.2.99.18		GO:0006281,GO:0004518	AT2G41460.1	ARP	apurinic endonuclease-redox protein
Glyma.02G191100	PF01092	PTHR11502			K02991	GO:0006412,GO:0005840,GO:0005622,GO:0003735	AT4G31700.1	RPS6,RPS6A	ribosomal protein S6
Glyma.02G191200		PTHR33067,PTHR33067:SF2
Glyma.02G191300	PF02892,PF14372	PTHR23272,PTHR23272:SF50	KOG1121			GO:0003677	AT3G42170.1		BED zinc finger ;hAT family dimerisation domain
Glyma.02G191400	PF08245	PTHR11136,PTHR11136:SF7		6.3.2.17		GO:0009058,GO:0005524,GO:0009396,GO:0004326	AT3G10160.1	ATDFC,DFC	DHFS-FPGS homolog C
Glyma.02G191500	PF08245	PTHR11136,PTHR11136:SF7	KOG2525	6.3.2.17		GO:0009058,GO:0005524,GO:0009396,GO:0004326	AT3G10160.1	ATDFC,DFC	DHFS-FPGS homolog C
Glyma.02G191500	PF08245	PTHR11136,PTHR11136:SF7	KOG2525	6.3.2.17		GO:0009058,GO:0005524,GO:0009396,GO:0004326	AT3G10160.1	ATDFC,DFC	DHFS-FPGS homolog C
Glyma.02G191500	PF08245	PTHR11136,PTHR11136:SF7	KOG2525	6.3.2.17		GO:0009058,GO:0005524,GO:0009396,GO:0004326	AT3G10160.1	ATDFC,DFC	DHFS-FPGS homolog C
Glyma.02G191500	PF08245	PTHR11136,PTHR11136:SF7	KOG2525	6.3.2.17		GO:0009058,GO:0005524,GO:0009396,GO:0004326	AT3G10160.1	ATDFC,DFC	DHFS-FPGS homolog C
Glyma.02G191500	PF08245	PTHR11136,PTHR11136:SF7	KOG2525	6.3.2.17		GO:0009058,GO:0005524,GO:0009396,GO:0004326	AT3G10160.1	ATDFC,DFC	DHFS-FPGS homolog C
Glyma.02G191500		PTHR11136,PTHR11136:SF7	KOG2525	6.3.2.17		GO:0009396,GO:0005524,GO:0004326	AT3G10160.1	ATDFC,DFC	DHFS-FPGS homolog C
Glyma.02G191500	PF08245	PTHR11136,PTHR11136:SF7	KOG2525	6.3.2.17		GO:0009058,GO:0005524,GO:0009396,GO:0004326	AT3G10160.1	ATDFC,DFC	DHFS-FPGS homolog C
Glyma.02G191500		PTHR11136,PTHR11136:SF7	KOG2525	6.3.2.17		GO:0009396,GO:0005524,GO:0004326	AT3G10160.1	ATDFC,DFC	DHFS-FPGS homolog C
Glyma.02G191500	PF08245	PTHR11136,PTHR11136:SF7	KOG2525	6.3.2.17		GO:0009058,GO:0005524,GO:0009396,GO:0004326	AT3G10160.1	ATDFC,DFC	DHFS-FPGS homolog C
Glyma.02G191500	PF08245	PTHR11136,PTHR11136:SF7		6.3.2.17		GO:0009058,GO:0005524,GO:0009396,GO:0004326	AT3G10160.1	ATDFC,DFC	DHFS-FPGS homolog C
Glyma.02G191500	PF08245	PTHR11136,PTHR11136:SF7	KOG2525	6.3.2.17		GO:0009058,GO:0005524,GO:0009396,GO:0004326	AT3G10160.1	ATDFC,DFC	DHFS-FPGS homolog C
Glyma.02G191500	PF00472,PF03462	PTHR11075,PTHR11075:SF52				GO:0006415,GO:0003747,GO:0016149,GO:0005737	AT3G57190.1		peptide chain release factor, putative
Glyma.02G191600	PF00076	PTHR23147,PTHR23147:SF4				GO:0003676
Glyma.02G191700	PF14223
Glyma.02G191800		PTHR12874,PTHR12874:SF11					AT5G04010.1		F-box family protein
Glyma.02G191900	PF01535,PF13041	PTHR24015,PTHR24015:SF785					AT5G13770.1		Pentatricopeptide repeat (PPR-like) superfamily protein
Glyma.02G192000	PF14223
Glyma.02G192100	PF00149	PTHR32440,PTHR32440:SF11	KOG1432			GO:0016787	AT3G10150.1	ATPAP16,PAP16	purple acid phosphatase 16
Glyma.02G192200		PTHR32440,PTHR32440:SF11	KOG1432				AT3G10150.1	ATPAP16,PAP16	purple acid phosphatase 16
Glyma.02G192200	PF00149	PTHR32440,PTHR32440:SF11	KOG1432			GO:0016787	AT3G10150.1	ATPAP16,PAP16	purple acid phosphatase 16
Glyma.02G192200	PF00149	PTHR32440,PTHR32440:SF11	KOG1432			GO:0016787	AT3G10150.1	ATPAP16,PAP16	purple acid phosphatase 16
Glyma.02G192200	PF13639	PTHR22763,PTHR22763:SF45	KOG1493		K19043	GO:0008270,GO:0005515	AT5G22000.2	RHF2A	RING-H2 group F2A
Glyma.02G192300	PF13639	PTHR22763,PTHR22763:SF45	KOG1493		K19043	GO:0008270,GO:0005515	AT5G22000.2	RHF2A	RING-H2 group F2A
Glyma.02G192300		PTHR22763,PTHR22763:SF19					AT5G22000.3	RHF2A	RING-H2 group F2A
Glyma.02G192300	PF00407	PTHR31338,PTHR31338:SF16				GO:0009607,GO:0006952	AT1G70890.1	MLP43	MLP-like protein 43
Glyma.02G192400	PF04181	PTHR14732,PTHR14732:SF0	KOG4780	3.1.3.16			AT5G26760.2
Glyma.02G192500	PF06886	PTHR31358,PTHR31358:SF10					AT2G35880.1		TPX2 (targeting protein for Xklp2) protein family
Glyma.02G192600	PF06886	PTHR31358,PTHR31358:SF10					AT2G35880.1		TPX2 (targeting protein for Xklp2) protein family
Glyma.02G192600	PF06886	PTHR31358,PTHR31358:SF10					AT2G35880.1		TPX2 (targeting protein for Xklp2) protein family
Glyma.02G192600	PF06886	PTHR31358,PTHR31358:SF10					AT2G35880.1		TPX2 (targeting protein for Xklp2) protein family
Glyma.02G192600	PF06886	PTHR31358,PTHR31358:SF10					AT2G35880.1		TPX2 (targeting protein for Xklp2) protein family
Glyma.02G192600	PF07714,PF13499	PTHR24349,PTHR24349:SF161	KOG0032	2.7.11.1	K13412	GO:0006468,GO:0004672	AT5G04870.1	ATCPK1,CPK1	calcium dependent protein kinase 1
Glyma.02G192700	PF13812,PF12854,PF01535,PF13041	PTHR24015,PTHR24015:SF752					AT5G06400.1		Pentatricopeptide repeat (PPR) superfamily protein
Glyma.02G192800
Glyma.02G192900	PF00226,PF07743	PTHR14021,PTHR14021:SF15	KOG3192		K04082	GO:0051259,GO:0051087,GO:0006457	AT5G06410.1		DNAJ heat shock N-terminal domain-containing protein
Glyma.02G193000	PF00226,PF07743	PTHR14021,PTHR14021:SF15	KOG3192		K04082	GO:0051259,GO:0051087,GO:0006457	AT5G06410.1		DNAJ heat shock N-terminal domain-containing protein
Glyma.02G193000	PF02892,PF04937	PTHR32166,PTHR32166:SF22				GO:0003677	AT3G22220.1		hAT transposon superfamily
Glyma.02G193100		PTHR34560,PTHR34560:SF1					AT5G06440.3
Glyma.02G193200	PF12776	PTHR31704,PTHR31704:SF10					AT2G24960.2
Glyma.02G193300	PF12776	PTHR31704,PTHR31704:SF10					AT2G24960.2
Glyma.02G193300	PF12776	PTHR31704,PTHR31704:SF10					AT2G24960.2
Glyma.02G193300	PF12776	PTHR31704,PTHR31704:SF10					AT2G24960.2
Glyma.02G193300	PF13676	PTHR11017,PTHR11017:SF171				GO:0007165,GO:0005515	AT5G36930.2		Disease resistance protein (TIR-NBS-LRR class) family
Glyma.02G193400		PTHR24320,PTHR24320:SF81		1.1.1.300			AT4G24050.1		NAD(P)-binding Rossmann-fold superfamily protein
Glyma.02G193500	PF00076	PTHR24012,PTHR24012:SF425				GO:0003676	AT5G55670.1		RNA-binding (RRM/RBD/RNP motifs) family protein
Glyma.02G193600	PF10358	PTHR31182,PTHR31182:SF2					AT3G11760.1
Glyma.02G193700	PF00462	PTHR10168,PTHR10168:SF74			K17479	GO:0045454,GO:0015035,GO:0009055	AT5G06470.1		Glutaredoxin family protein
Glyma.02G193800	PF02221	PTHR11306,PTHR11306:SF12	KOG4680				AT3G11780.1		MD-2-related lipid recognition domain-containing protein / ML domain-containing protein
Glyma.02G193900	PF02221	PTHR11306,PTHR11306:SF12					AT3G11780.1		MD-2-related lipid recognition domain-containing protein / ML domain-containing protein
Glyma.02G193900	PF00319	PTHR11945,PTHR11945:SF185				GO:0046983,GO:0003677	AT5G60440.1	AGL62	AGAMOUS-like 62
Glyma.02G194000	PF00538	PTHR11467,PTHR11467:SF33				GO:0006334,GO:0005634,GO:0003677,GO:0000786	AT1G48620.1	HON5	high mobility group A5
Glyma.02G194100
Glyma.02G194200	PF00319	PTHR11945,PTHR11945:SF185	KOG0014			GO:0046983,GO:0003677	AT5G60440.1	AGL62	AGAMOUS-like 62
Glyma.02G194300	PF13639	PTHR14155,PTHR14155:SF90	KOG1493			GO:0008270,GO:0005515	AT2G35910.1		RING/U-box superfamily protein
Glyma.02G194400		PTHR33833,PTHR33833:SF1					AT5G60030.1
Glyma.02G194500	PF00201	PTHR11926,PTHR11926:SF280	KOG1192	2.4.1.324		GO:0016758,GO:0008152	AT1G22400.1	ATUGT85A1,UGT85A1	UDP-Glycosyltransferase superfamily protein
Glyma.02G194600		PTHR21528,PTHR21528:SF0		2.5.1.87			AT1G11755.1	LEW1	Undecaprenyl pyrophosphate synthetase family protein
Glyma.02G194700	PF01474	PTHR21337,PTHR21337:SF7		2.5.1.54	K01626	GO:0009073,GO:0003849	AT1G22410.1		Class-II DAHP synthetase family protein
Glyma.02G208400	PF01474	PTHR21337,PTHR21337:SF7		2.5.1.54		GO:0009073,GO:0003849	AT1G22410.1		Class-II DAHP synthetase family protein
Glyma.02G208400	PF00069	PTHR24343,PTHR24343:SF207	KOG0583	2.7.11.1	K14498	GO:0006468,GO:0005524,GO:0004672	AT1G78290.2	SNRK2-8,SNRK2.8,SRK2C	Protein kinase superfamily protein
Glyma.02G208500	PF07847	PTHR22966,PTHR22966:SF2	KOG4281	1.13.11.19	K10712	GO:0055114,GO:0016702	AT1G18490.1		Protein of unknown function (DUF1637)
Glyma.02G208600	PF07847	PTHR22966,PTHR22966:SF2	KOG4281	1.13.11.19	K10712	GO:0055114,GO:0016702	AT1G18490.1		Protein of unknown function (DUF1637)
Glyma.02G208600	PF00244	PTHR18860,PTHR18860:SF26	KOG0841		K06630	GO:0019904	AT1G78300.1	14-3-3OMEGA,GF14 OMEGA,GRF2	general regulatory factor 2
Glyma.02G208700	PF00244	PTHR18860,PTHR18860:SF26	KOG0841			GO:0019904	AT4G09000.2	GF14 CHI,GRF1	general regulatory factor 1
Glyma.02G208700	PF05678	PTHR33783,PTHR33783:SF1					AT1G78310.1		VQ motif-containing protein
Glyma.02G208800	PF02297	PTHR11387,PTHR11387:SF15	KOG3057	1.9.3.1	K02267	GO:0005739,GO:0004129	AT1G22450.1	ATCOX6B2,COX6B	cytochrome C oxidase 6B
Glyma.02G208900	PF00141	PTHR31356,PTHR31356:SF6		1.11.1.11	K00434	GO:0055114,GO:0020037,GO:0006979,GO:0004601	AT4G09010.1	APX4,TL29	ascorbate peroxidase 4
Glyma.02G209000	PF00141	PTHR31356,PTHR31356:SF6		1.11.1.11		GO:0055114,GO:0020037,GO:0006979,GO:0004601	AT4G09010.1	APX4,TL29	ascorbate peroxidase 4
Glyma.02G209000	PF10250	PTHR31741,PTHR31741:SF1					AT1G22460.1		O-fucosyltransferase family protein
Glyma.02G209100	PF10250	PTHR31741,PTHR31741:SF1					AT1G22460.1		O-fucosyltransferase family protein
Glyma.02G209100		PTHR34046,PTHR34046:SF3					AT1G35210.1
Glyma.02G209200	PF05699,PF14291	PTHR11697,PTHR11697:SF136				GO:0046983	AT1G19260.1		TTF-type zinc finger protein with HAT dimerisation domain
Glyma.02G209300	PF00324	PTHR11785,PTHR11785:SF378	KOG1287			GO:0055085,GO:0016020,GO:0006810,GO:0015171,GO:0003333	AT3G13620.1		Amino acid permease family protein
Glyma.02G209400	PF02298	PTHR33021,PTHR33021:SF64				GO:0009055	AT1G72230.1		Cupredoxin superfamily protein
Glyma.02G209500		PTHR35689,PTHR35689:SF1					AT4G09060.1
Glyma.02G209600		PTHR35689,PTHR35689:SF1					AT4G09060.1
Glyma.02G209600		PTHR35689,PTHR35689:SF1					AT4G09060.1
Glyma.02G209600		PTHR35689,PTHR35689:SF1					AT4G09060.1
Glyma.02G209600		PTHR11601,PTHR11601:SF47					AT3G62130.1		Pyridoxal phosphate (PLP)-dependent transferases superfamily protein
Glyma.02G209700		PTHR24067,PTHR24067:SF118					AT1G23260.1	MMZ1,UEV1A	MMS ZWEI homologue 1
Glyma.02G209800	PF00719	PTHR10286,PTHR10286:SF10		3.6.1.1	K01507	GO:0006796,GO:0005737,GO:0004427,GO:0000287	AT2G46860.1	AtPPa3,PPa3	pyrophosphorylase 3
Glyma.02G209900		PTHR33735,PTHR33735:SF1					AT2G14095.1
Glyma.02G210000		PTHR33735,PTHR33735:SF1					AT2G14095.1
Glyma.02G210000		PTHR33735,PTHR33735:SF1					AT2G14095.1
Glyma.02G210000		PTHR33735,PTHR33735:SF1
Glyma.02G210100	PF14244	PTHR37610,PTHR37610:SF1					AT1G21280.1
Glyma.02G210200		PTHR33735,PTHR33735:SF1					AT2G14095.1
Glyma.02G210300	PF13639	PTHR14155,PTHR14155:SF174				GO:0008270,GO:0005515	AT1G72220.1		RING/U-box superfamily protein
Glyma.02G210400	PF00010	PTHR11969,PTHR11969:SF19				GO:0046983	AT1G72210.1		basic helix-loop-helix (bHLH) DNA-binding superfamily protein
Glyma.02G210500	PF13639	PTHR14155	KOG1493		K10664	GO:0008270,GO:0005515	AT1G72200.1		RING/U-box superfamily protein
Glyma.02G210600	PF13639	PTHR14155			K10664	GO:0008270,GO:0005515	AT1G72200.1		RING/U-box superfamily protein
Glyma.02G210700	PF14226,PF03171	PTHR10209,PTHR10209:SF167	KOG0143	1.14.11.9		GO:0055114,GO:0016491	AT4G10500.1		2-oxoglutarate (2OG) and Fe(II)-dependent oxygenase superfamily protein
Glyma.02G210800	PF03171	PTHR10209,PTHR10209:SF167		1.14.11.31		GO:0055114,GO:0016491	AT2G36690.1		2-oxoglutarate (2OG) and Fe(II)-dependent oxygenase superfamily protein
Glyma.02G210900	PF16913	PTHR31376,PTHR31376:SF1				GO:0016021,GO:0005215	AT1G28220.1	ATPUP3,PUP3	purine permease 3
Glyma.02G211000
Glyma.02G211100	PF00684,PF00226,PF01556	PTHR24078,PTHR24078:SF247	KOG0715		K03686	GO:0051082,GO:0031072	AT1G28210.2	ATJ1	DNAJ heat shock family protein
Glyma.02G211200	PF01259	PTHR11609,PTHR11609:SF9	KOG2835	6.3.2.6	K01923		AT3G21110.2	ATPURC,PUR7,PURC	purin 7
Glyma.02G211300	PF14531	PTHR24349,PTHR24349:SF102	KOG0032	2.7.11.1			AT1G12680.1	PEPKR2	phosphoenolpyruvate carboxylase-related kinase 2
Glyma.02G211400		PTHR12791,PTHR12791:SF32	KOG3385		K08505		AT4G14600.1		Target SNARE coiled-coil domain protein
Glyma.02G211500	PF03959	PTHR22778,PTHR22778:SF19	KOG2551	1.5.1.3			AT4G24380.1
Glyma.02G211600	PF00153	PTHR24089,PTHR24089:SF396	KOG0756		K15100		AT5G01340.1		Mitochondrial substrate carrier family protein
Glyma.02G211700	PF00153	PTHR24089,PTHR24089:SF396	KOG0756				AT5G01340.1		Mitochondrial substrate carrier family protein
Glyma.02G211700	PF00153	PTHR24089,PTHR24089:SF396	KOG0756				AT5G01340.1		Mitochondrial substrate carrier family protein
Glyma.02G211700	PF00153	PTHR24089,PTHR24089:SF396	KOG0756		K15100		AT5G01340.1		Mitochondrial substrate carrier family protein
Glyma.02G211700		PTHR24006,PTHR24006:SF430	KOG1947				AT5G49980.1	AFB5	auxin F-box protein 5
Glyma.02G211800	PF04770	PTHR31948,PTHR31948:SF20					AT4G24660.1	ATHB22,HB22,MEE68	homeobox protein 22
Glyma.02G211900	PF04770	PTHR31948,PTHR31948:SF20					AT4G24660.1	ATHB22,HB22,MEE68	homeobox protein 22
Glyma.02G211900	PF04770	PTHR31948,PTHR31948:SF20					AT4G24660.1	ATHB22,HB22,MEE68	homeobox protein 22
Glyma.02G211900	PF00069	PTHR27001,PTHR27001:SF240	KOG1187	2.7.11.1	K04730	GO:0006468,GO:0005524,GO:0004672	AT1G28390.1		Protein kinase superfamily protein
Glyma.02G212000		PTHR33779,PTHR33779:SF1					AT1G02070.1
Glyma.02G212100		PTHR36066,PTHR36066:SF1					AT5G09460.1		sequence-specific DNA binding transcription factors;transcription regulators
Glyma.02G212200		PTHR35281,PTHR35281:SF1					AT5G50011.1	CPuORF37	conserved peptide upstream open reading frame 37
Glyma.02G212300	PF02984,PF00134	PTHR10177,PTHR10177:SF213	KOG0656		K18810	GO:0005634	AT2G22490.2	ATCYCD2;1,CYCD2;1	Cyclin D2;1
Glyma.02G212400	PF00226	PTHR24078					AT2G33735.1		Chaperone DnaJ-domain superfamily protein
Glyma.02G212500	PF00226	PTHR24078					AT2G33735.1		Chaperone DnaJ-domain superfamily protein
Glyma.02G212500	PF00342	PTHR11469,PTHR11469:SF9		5.3.1.9	K01810	GO:0006096,GO:0006094,GO:0004347	AT4G24620.1	PGI,PGI1	phosphoglucose isomerase 1
Glyma.02G212600		PTHR31110,PTHR31110:SF2					AT4G24610.1
Glyma.02G212700		PTHR31110,PTHR31110:SF2					AT4G24610.1
Glyma.02G212700		PTHR31110,PTHR31110:SF2					AT4G24610.1
Glyma.02G212700		PTHR31110,PTHR31110:SF2					AT4G24610.1
Glyma.02G212700		PTHR31110,PTHR31110:SF2					AT4G24610.1
Glyma.02G212700
Glyma.02G212800
Glyma.02G212900	PF14543	PTHR13683,PTHR13683:SF259	KOG1339	3.4.23.12		GO:0006508,GO:0004190	AT1G09750.1		Eukaryotic aspartyl protease family protein
Glyma.02G213000	PF00582	PTHR31964,PTHR31964:SF2				GO:0006950	AT1G09740.1		Adenine nucleotide alpha hydrolases-like superfamily protein
Glyma.02G213100	PF00582	PTHR31964,PTHR31964:SF2				GO:0006950	AT1G09740.1		Adenine nucleotide alpha hydrolases-like superfamily protein
Glyma.02G213100	PF00582	PTHR31964,PTHR31964:SF2				GO:0006950	AT1G09740.1		Adenine nucleotide alpha hydrolases-like superfamily protein
Glyma.02G213100		PTHR33597,PTHR33597:SF2					AT1G58120.1
Glyma.02G213200		PTHR33597,PTHR33597:SF1					AT1G58122.1	CPuORF45	conserved peptide upstream open reading frame 45
Glyma.02G213300	PF01753,PF13423	PTHR24006,PTHR24006:SF503	KOG1865	3.4.19.12	K11855		AT5G65450.1	UBP17	ubiquitin-specific protease 17
Glyma.02G213400	PF03479	PTHR31100,PTHR31100:SF1					AT5G49700.1		Predicted AT-hook DNA-binding family protein
Glyma.02G213500	PF00928	PTHR10529,PTHR10529:SF242	KOG0937				AT4G24550.2		Clathrin adaptor complexes medium subunit family protein
Glyma.02G213600	PF00484	PTHR11002,PTHR11002:SF19	KOG1578	4.2.1.1	K01673	GO:0008270,GO:0004089	AT4G33580.1	ATBCA5,BCA5	beta carbonic anhydrase 5
Glyma.02G213700	PF00484	PTHR11002,PTHR11002:SF19		4.2.1.1		GO:0008270,GO:0004089	AT4G33580.1	ATBCA5,BCA5	beta carbonic anhydrase 5
Glyma.02G213700	PF00010	PTHR12565,PTHR12565:SF120				GO:0046983	AT3G25710.1	ATAIG1,BHLH32,TMO5	basic helix-loop-helix 32
Glyma.02G213800	PF00226	PTHR24078,PTHR24078:SF259					AT1G62970.1		Chaperone DnaJ-domain superfamily protein
Glyma.02G213900							AT4G33620.1		Cysteine proteinases superfamily protein
Glyma.02G214000	PF02902	PTHR24365	KOG3246	3.4.22.68		GO:0008234,GO:0006508	AT1G09730.1		Cysteine proteinases superfamily protein
Glyma.02G214100				3.6.4.5			AT2G47500.1		P-loop nucleoside triphosphate hydrolases superfamily protein with CH (Calponin Homology) domain
Glyma.02G214200	PF00225	PTHR24115,PTHR24115:SF463		3.6.4.4	K10395	GO:0008017,GO:0007018,GO:0005524,GO:0003777,GO:0005871	AT5G60930.1		P-loop containing nucleoside triphosphate hydrolases superfamily protein
Glyma.02G214300		PTHR34464					AT4G38060.2
Glyma.02G214400	PF07765	PTHR31631,PTHR31631:SF3					AT1G58210.1	EMB1674	kinase interacting family protein
Glyma.02G214500	PF00249	PTHR21717,PTHR21717:SF20					AT1G09710.2		Homeodomain-like superfamily protein
Glyma.02G214600	PF00175,PF00258,PF00667	PTHR19384,PTHR19384:SF85		1.6.2.4		GO:0055114,GO:0016491,GO:0010181	AT4G24520.1	AR1,ATR1	P450 reductase 1
Glyma.02G214700
Glyma.02G214800	PF02458	PTHR31642,PTHR31642:SF12				GO:0016747	AT4G24510.1	CER2,VC-2,VC2	HXXXD-type acyl-transferase family protein
Glyma.02G214900	PF07227	PTHR21736,PTHR21736:SF24					AT4G30200.3	VEL1	vernalization5/VIN3-like
Glyma.02G215000	PF15502	PTHR36054,PTHR36054:SF1					AT4G24500.1		hydroxyproline-rich glycoprotein family protein
Glyma.02G215100	PF09588						AT1G13810.1		Restriction endonuclease, type II-like superfamily protein
Glyma.02G215200	PF07714,PF14381	PTHR23257,PTHR23257:SF349		2.7.11.1		GO:0006468,GO:0004672	AT4G24480.1		Protein kinase superfamily protein
Glyma.02G215300	PF04782	PTHR21450,PTHR21450:SF21					AT2G34670.2		Protein of unknown function (DUF630 and DUF632)
Glyma.02G215400
Glyma.02G215500	PF06200,PF00320,PF06203	PTHR10071,PTHR10071:SF192				GO:0043565,GO:0008270,GO:0006355,GO:0003700,GO:0005515	AT4G24470.2	GATA25,TIFY1,ZIM	GATA-type zinc finger protein with TIFY domain
Glyma.02G215600	PF01471,PF00413	PTHR10201,PTHR10201:SF140		3.4.24.17		GO:0031012,GO:0008270,GO:0006508,GO:0004222	AT1G70170.1	MMP	matrix metalloproteinase
Glyma.02G215700	PF10347,PF10351	PTHR15678,PTHR15678:SF8					AT1G58250.1	SAB	Golgi-body localisation protein domain ;RNA pol II promoter Fmp27 protein domain
Glyma.02G215800	PF12874,PF03134,PF13456	PTHR12300,PTHR12300:SF57					AT1G74520.1	ATHVA22A,HVA22A	HVA22 homologue A
Glyma.02G215900	PF00627,PF14377,PF06012,PF06025,PF00632	PTHR11254,PTHR11254:SF334		6.3.2.19	K10592	GO:0004842	AT1G55860.2	UPL1	ubiquitin-protein ligase 1
Glyma.02G216000	PF00627,PF14377,PF06012,PF06025,PF00632	PTHR11254,PTHR11254:SF334		6.3.2.19	K10592	GO:0004842	AT1G55860.2	UPL1	ubiquitin-protein ligase 1
Glyma.02G216000	PF02268,PF02751	PTHR10966	KOG3463		K03123	GO:0006367,GO:0005672	AT4G24440.2		transcription initiation factor IIA gamma chain / TFIIA-gamma (TFIIA-S)
Glyma.02G216100							AT2G38465.1
Glyma.02G216200	PF14686,PF14683,PF06045	PTHR32018		4.2.2.23	K18195		AT4G24430.1		Rhamnogalacturonate lyase family protein
Glyma.02G216300	PF14686,PF14683,PF06045	PTHR32018		4.2.2.23	K18195		AT4G24430.1		Rhamnogalacturonate lyase family protein
Glyma.02G216300		PTHR12832,PTHR12832:SF11					AT1G22930.1		T-complex protein 11
Glyma.02G216400		PTHR16295					AT1G09920.1		TRAF-type zinc finger-related
Glyma.02G216500		PTHR16295					AT1G09920.1		TRAF-type zinc finger-related
Glyma.02G216500		PTHR16295					AT1G09920.1		TRAF-type zinc finger-related
Glyma.02G216500	PF00319,PF01486	PTHR11945,PTHR11945:SF147	KOG0014			GO:0046983,GO:0003677,GO:0006355,GO:0005634,GO:0003700,GO:2000029,GO:0048481,GO:0048316	AT3G57230.1	AGL16	AGAMOUS-like 16
Glyma.02G216600	PF00319,PF01486	PTHR11945,PTHR11945:SF147	KOG0014			GO:0046983,GO:0003677,GO:0006355,GO:0005634,GO:0003700,GO:2000029,GO:0048481,GO:0048316	AT3G57230.1	AGL16	AGAMOUS-like 16
Glyma.02G216600	PF00319,PF01486	PTHR11945,PTHR11945:SF147	KOG0014			GO:0046983,GO:0003677,GO:0006355,GO:0005634,GO:0003700,GO:2000029,GO:0048481,GO:0048316	AT3G57230.1	AGL16	AGAMOUS-like 16
Glyma.02G216600	PF00319,PF01486	PTHR11945,PTHR11945:SF147	KOG0014			GO:0046983,GO:0003677,GO:0006355,GO:0005634,GO:0003700,GO:2000029,GO:0048481,GO:0048316	AT3G57230.1	AGL16	AGAMOUS-like 16
Glyma.02G216600	PF00319,PF01486	PTHR11945,PTHR11945:SF147	KOG0014			GO:0046983,GO:0003677,GO:0006355,GO:0005634,GO:0003700,GO:2000029,GO:0048481,GO:0048316	AT3G57230.1	AGL16	AGAMOUS-like 16
Glyma.02G216600	PF00319,PF01486	PTHR11945,PTHR11945:SF147	KOG0014			GO:0046983,GO:0003677,GO:0006355,GO:0005634,GO:0003700,GO:2000029,GO:0048481,GO:0048316	AT3G57230.1	AGL16	AGAMOUS-like 16
Glyma.02G216600
Glyma.02G216700
Glyma.02G216800	PF13041	PTHR24015,PTHR24015:SF358					AT1G09900.1		Pentatricopeptide repeat (PPR-like) superfamily protein
Glyma.02G216900	PF13041	PTHR24015,PTHR24015:SF358					AT1G09900.1		Pentatricopeptide repeat (PPR-like) superfamily protein
Glyma.02G216900	PF13041	PTHR24015,PTHR24015:SF358					AT1G09900.1		Pentatricopeptide repeat (PPR-like) superfamily protein
Glyma.02G216900		PTHR33168,PTHR33168:SF3
Glyma.02G217000	PF00464	PTHR11680,PTHR11680:SF12		2.1.2.1	K00600	GO:0016740	AT5G26780.1	SHM2	serine hydroxymethyltransferase 2
Glyma.02G217100	PF00464	PTHR11680,PTHR11680:SF12		2.1.2.1	K00600	GO:0016740	AT5G26780.1	SHM2	serine hydroxymethyltransferase 2
Glyma.02G217100	PF00464	PTHR11680,PTHR11680:SF12		2.1.2.1		GO:0016740	AT5G26780.1	SHM2	serine hydroxymethyltransferase 2
Glyma.02G217100	PF14432,PF01535,PF13041	PTHR24015,PTHR24015:SF779					AT2G27610.1		Tetratricopeptide repeat (TPR)-like superfamily protein
Glyma.02G217200	PF14531,PF03822	PTHR24343,PTHR24343:SF157	KOG0583	2.7.11.1		GO:0007165	AT4G24400.1	ATCIPK8,CIPK8,PKS11,SnRK3.13	CBL-interacting protein kinase 8
Glyma.02G217300	PF07173	PTHR34365,PTHR34365:SF2					AT4G37900.1		Protein of unknown function (duplicated DUF1399)
Glyma.02G217400	PF00564	PTHR31066,PTHR31066:SF2				GO:0005515	AT5G09620.1		Octicosapeptide/Phox/Bem1p family protein
Glyma.02G217500	PF00300	PTHR23029,PTHR23029:SF40	KOG4754				AT5G64460.2		Phosphoglycerate mutase family protein
Glyma.02G217600	PF00300	PTHR23029,PTHR23029:SF40	KOG4754				AT5G64460.6		Phosphoglycerate mutase family protein
Glyma.02G217600	PF00300	PTHR23029,PTHR23029:SF40	KOG4754				AT5G64460.3		Phosphoglycerate mutase family protein
Glyma.02G217600	PF00300	PTHR23029,PTHR23029:SF40	KOG4754				AT5G64460.1		Phosphoglycerate mutase family protein
Glyma.02G217600	PF00300	PTHR23029,PTHR23029:SF40	KOG4754				AT5G64460.8		Phosphoglycerate mutase family protein
Glyma.02G217600	PF00300	PTHR23029,PTHR23029:SF40	KOG4754				AT5G64460.2		Phosphoglycerate mutase family protein
Glyma.02G217600	PF00300	PTHR23029,PTHR23029:SF40	KOG4754				AT5G64460.1		Phosphoglycerate mutase family protein
Glyma.02G217600	PF00300	PTHR23029,PTHR23029:SF40	KOG4754				AT5G64460.3		Phosphoglycerate mutase family protein
Glyma.02G217600	PF00300	PTHR23029,PTHR23029:SF40	KOG4754				AT5G64460.4		Phosphoglycerate mutase family protein
Glyma.02G217600	PF00300	PTHR23029,PTHR23029:SF40	KOG4754				AT5G64460.4		Phosphoglycerate mutase family protein
Glyma.02G217600
Glyma.02G217700	PF00010	PTHR31945,PTHR31945:SF6				GO:0046983	AT5G65640.1	bHLH093	beta HLH protein 93
Glyma.02G217800		PTHR34291,PTHR34291:SF1					AT5G65660.1		hydroxyproline-rich glycoprotein family protein
Glyma.02G217900		PTHR34291,PTHR34291:SF1					AT5G65660.1		hydroxyproline-rich glycoprotein family protein
Glyma.02G217900
Glyma.02G218000	PF02309	PTHR31734,PTHR31734:SF18			K14484	GO:0006355,GO:0005634	AT5G65670.2	IAA9	indole-3-acetic acid inducible 9
Glyma.02G218100	PF02309	PTHR31734,PTHR31734:SF18				GO:0006355,GO:0005634	AT5G65670.1	IAA9	indole-3-acetic acid inducible 9
Glyma.02G218100	PF02309	PTHR31734,PTHR31734:SF18			K14484	GO:0006355,GO:0005634	AT5G65670.2	IAA9	indole-3-acetic acid inducible 9
Glyma.02G218100	PF02309	PTHR31734,PTHR31734:SF18			K14484	GO:0006355,GO:0005634	AT5G65670.2	IAA9	indole-3-acetic acid inducible 9
Glyma.02G218100	PF17123,PF00092	PTHR10579,PTHR10579:SF55					AT5G49665.1		Zinc finger (C3HC4-type RING finger) family protein
Glyma.02G218200	PF03807,PF00745,PF05201	PTHR13812,PTHR13812:SF20		1.2.1.70	K02492	GO:0055114,GO:0050661,GO:0033014,GO:0008883	AT1G58290.1	HEMA1	Glutamyl-tRNA reductase family protein
Glyma.02G218300	PF01554	PTHR11206,PTHR11206:SF92	KOG1347		K03327	GO:0055085,GO:0016020,GO:0015297,GO:0015238,GO:0006855	AT1G58340.1	ZF14	MATE efflux family protein
Glyma.02G218400	PF13966
Glyma.02G218500	PF13347	PTHR19432,PTHR19432:SF38	KOG0637		K15378		AT1G09960.1	ATSUC4,ATSUT4,SUC4,SUT4	sucrose transporter 4
Glyma.02G218600	PF13347	PTHR19432,PTHR19432:SF38	KOG0637		K15378		AT1G09960.1	ATSUC4,ATSUT4,SUC4,SUT4	sucrose transporter 4
Glyma.02G218600	PF13347	PTHR19432,PTHR19432:SF38	KOG0637		K15378		AT1G09960.1	ATSUC4,ATSUT4,SUC4,SUT4	sucrose transporter 4
Glyma.02G218600	PF02558,PF07479	PTHR11728,PTHR11728:SF13	KOG2711	1.1.1.8	K00006	GO:0055114,GO:0008677,GO:0005975,GO:0004367,GO:0009331,GO:0006072	AT2G40690.1	GLY1,SFD1	NAD-dependent glycerol-3-phosphate dehydrogenase family protein
Glyma.02G218700	PF00999	PTHR32468,PTHR32468:SF17	KOG1650			GO:0055085,GO:0016021,GO:0015299,GO:0006812	AT5G22900.1	ATCHX3,CHX3	cation/H+ exchanger 3
Glyma.02G218800	PF00581	PTHR22778,PTHR22778:SF12	KOG1530				AT2G40760.1		Rhodanese/Cell cycle control phosphatase superfamily protein
Glyma.02G218900	PF01535,PF13041	PTHR24015,PTHR24015:SF323					AT5G37570.1		Pentatricopeptide repeat (PPR-like) superfamily protein
Glyma.02G219000		PTHR37758					AT5G05220.1
Glyma.02G219100	PF00097,PF00271,PF00176	PTHR10799,PTHR10799:SF695		3.6.4.12	K15710	GO:0046872,GO:0005524	AT2G40770.1		zinc ion binding;DNA binding;helicases;ATP binding;nucleic acid binding
Glyma.02G219200	PF00097,PF00271,PF00176	PTHR10799,PTHR10799:SF695		3.6.4.12		GO:0046872,GO:0005524	AT2G40770.1		zinc ion binding;DNA binding;helicases;ATP binding;nucleic acid binding
Glyma.02G219200	PF00097,PF00271,PF00176	PTHR10799,PTHR10799:SF695		3.6.4.12	K15710	GO:0046872,GO:0005524	AT2G40770.1		zinc ion binding;DNA binding;helicases;ATP binding;nucleic acid binding
Glyma.02G219200	PF00097,PF00176	PTHR10799,PTHR10799:SF695		3.6.4.12		GO:0046872,GO:0005524	AT2G40770.1		zinc ion binding;DNA binding;helicases;ATP binding;nucleic acid binding
Glyma.02G219200	PF00097,PF00176	PTHR10799,PTHR10799:SF695		3.6.4.12		GO:0046872,GO:0005524	AT2G40770.1		zinc ion binding;DNA binding;helicases;ATP binding;nucleic acid binding
Glyma.02G219200	PF03109	PTHR10566,PTHR10566:SF41		3.6.3.46			AT5G05200.1		Protein kinase superfamily protein
Glyma.02G219300	PF03109	PTHR10566,PTHR10566:SF41		3.6.3.46			AT5G05200.1		Protein kinase superfamily protein
Glyma.02G219300	PF11331	PTHR31105,PTHR31105:SF2					AT5G05190.1		Protein of unknown function (DUF3133)
Glyma.02G219400	PF11331	PTHR31105,PTHR31105:SF2					AT5G05190.1		Protein of unknown function (DUF3133)
Glyma.02G219400	PF11331	PTHR31105,PTHR31105:SF2					AT5G05190.1		Protein of unknown function (DUF3133)
Glyma.02G219400	PF11331	PTHR31105,PTHR31105:SF2					AT5G05190.1		Protein of unknown function (DUF3133)
Glyma.02G219400	PF11331	PTHR31105,PTHR31105:SF2					AT5G05190.1		Protein of unknown function (DUF3133)
Glyma.02G219400	PF11331	PTHR31105,PTHR31105:SF2					AT5G05190.1		Protein of unknown function (DUF3133)
Glyma.02G219400
Glyma.02G219500
Glyma.02G219600	PF12695	PTHR10992,PTHR10992:SF840		3.1.1.1			AT3G10870.1	ATMES17,MES17	methyl esterase 17
Glyma.02G219700	PF00560,PF08263,PF13855,PF00069	PTHR27008,PTHR27008:SF22	KOG1187	2.7.11.1		GO:0005515,GO:0006468,GO:0005524,GO:0004672	AT5G58300.2		Leucine-rich repeat protein kinase family protein
Glyma.02G219800
Glyma.02G219900	PF00252	PTHR11726,PTHR11726:SF15	KOG0857		K02866	GO:0006412,GO:0005840,GO:0003735	AT1G26910.1	RPL10B	Ribosomal protein L16p/L10e family protein
Glyma.02G220000	PF16123	PTHR11935,PTHR11935:SF94		3.1.2.6			AT3G10850.1	GLX2-2,GLY2	Metallo-hydrolase/oxidoreductase superfamily protein
Glyma.02G220100
Glyma.02G220200	PF00168	PTHR32246,PTHR32246:SF15				GO:0005515	AT2G40815.1		Calcium-dependent lipid-binding (CaLB domain) family protein
Glyma.02G220300		PTHR31789,PTHR31789:SF5					AT3G54190.1		Transducin/WD40 repeat-like superfamily protein
Glyma.02G220400		PTHR31789,PTHR31789:SF5					AT3G54190.1		Transducin/WD40 repeat-like superfamily protein
Glyma.02G220400		PTHR31851,PTHR31851:SF16					AT4G27870.1		Vacuolar iron transporter (VIT) family protein
Glyma.02G220500		PTHR31851,PTHR31851:SF16					AT4G27870.1		Vacuolar iron transporter (VIT) family protein
Glyma.02G220500		PTHR31851,PTHR31851:SF16					AT4G27870.1		Vacuolar iron transporter (VIT) family protein
Glyma.02G220500		PTHR31851,PTHR31851:SF16					AT4G27870.1		Vacuolar iron transporter (VIT) family protein
Glyma.02G220500	PF07910	PTHR24375	KOG4696				AT5G24680.1		Peptidase C78, ubiquitin fold modifier-specific peptidase 1/ 2
Glyma.02G220600	PF07910	PTHR24375	KOG4696				AT5G24680.1		Peptidase C78, ubiquitin fold modifier-specific peptidase 1/ 2
Glyma.02G220600	PF07910	PTHR24375	KOG4696				AT5G24680.1		Peptidase C78, ubiquitin fold modifier-specific peptidase 1/ 2
Glyma.02G220600	PF07910	PTHR24375	KOG4696				AT5G24680.1		Peptidase C78, ubiquitin fold modifier-specific peptidase 1/ 2
Glyma.02G220600	PF10033	PTHR13430,PTHR13430:SF3	KOG4573		K08331		AT3G49590.1		Autophagy-related protein 13
Glyma.02G220700	PF00076	PTHR23147,PTHR23147:SF6	KOG4207		K12900	GO:0003676	AT3G13570.1	SCL30A	SC35-like splicing factor 30A
Glyma.02G220800	PF00076	PTHR23147,PTHR23147:SF6	KOG0107			GO:0003676	AT3G13570.1	SCL30A	SC35-like splicing factor 30A
Glyma.02G220800	PF00314	PTHR31048,PTHR31048:SF16					AT5G24620.1		Pathogenesis-related thaumatin superfamily protein
Glyma.02G220900	PF00314	PTHR31048,PTHR31048:SF16					AT5G24620.1		Pathogenesis-related thaumatin superfamily protein
Glyma.02G220900		PTHR36372,PTHR36372:SF1					AT5G24610.1
Glyma.02G221000	PF01900	PTHR10993	KOG4639	3.1.26.5	K03537	GO:0008033,GO:0004540	AT1G04635.1	EMB1687	ribonuclease P family protein / Rpp14 family protein
Glyma.02G221100	PF01900	PTHR10993				GO:0008033,GO:0004540	AT1G04635.1	EMB1687	ribonuclease P family protein / Rpp14 family protein
Glyma.02G221100	PF04654	PTHR31168,PTHR31168:SF3					AT5G24600.1		Protein of unknown function, DUF599
Glyma.02G221200	PF00488	PTHR11361,PTHR11361:SF81				GO:0030983,GO:0006298,GO:0005524	AT5G54090.1		DNA mismatch repair protein MutS, type 2
Glyma.02G221300		PTHR19376,PTHR19376:SF38		2.7.7.6			ATCG00170.1		DNA-directed RNA polymerase family protein
Glyma.02G221400	PF00318	PTHR12534				GO:0006412,GO:0005840,GO:0005622,GO:0003735,GO:0015935	ATCG00160.1		ribosomal protein S2
Glyma.02G221500	PF05978	PTHR23294,PTHR23294:SF25	KOG3098				AT1G18010.1		Major facilitator superfamily protein
Glyma.02G221600	PF05978	PTHR23294,PTHR23294:SF25	KOG3098				AT1G18000.1		Major facilitator superfamily protein
Glyma.02G221600	PF05978	PTHR23294,PTHR23294:SF25	KOG3098				AT1G18000.1		Major facilitator superfamily protein
Glyma.02G221600		PTHR34376,PTHR34376:SF2					AT4G01575.1		serine protease inhibitor, Kazal-type family protein
Glyma.02G221700
Glyma.02G221800	PF07714,PF00139	PTHR27007,PTHR27007:SF39	KOG1187	2.7.11.1		GO:0006468,GO:0004672,GO:0030246	AT5G55830.1		Concanavalin A-like lectin protein kinase family protein
Glyma.02G221900	PF00892	PTHR31218,PTHR31218:SF16				GO:0016021,GO:0016020,GO:0022857	AT1G09380.1		nodulin MtN21 /EamA-like transporter family protein
Glyma.02G222000	PF00892	PTHR31218,PTHR31218:SF16				GO:0016021,GO:0016020,GO:0022857	AT2G37460.1		nodulin MtN21 /EamA-like transporter family protein
Glyma.02G222000	PF00892	PTHR31218,PTHR31218:SF16				GO:0016021,GO:0016020,GO:0022857	AT2G37460.1		nodulin MtN21 /EamA-like transporter family protein
Glyma.02G222000	PF00892	PTHR31218,PTHR31218:SF16				GO:0016021,GO:0016020,GO:0022857	AT1G09380.1		nodulin MtN21 /EamA-like transporter family protein
Glyma.02G222000	PF00892	PTHR31218,PTHR31218:SF16				GO:0016021,GO:0016020,GO:0022857	AT2G37460.1		nodulin MtN21 /EamA-like transporter family protein
Glyma.02G222000	PF00892	PTHR31218,PTHR31218:SF16				GO:0016021,GO:0016020,GO:0022857	AT1G09380.1		nodulin MtN21 /EamA-like transporter family protein
Glyma.02G222000	PF00892	PTHR31218,PTHR31218:SF16				GO:0016021,GO:0016020,GO:0022857	AT5G07050.1		nodulin MtN21 /EamA-like transporter family protein
Glyma.02G222100	PF03372	PTHR12121,PTHR12121:SF44	KOG2338				AT5G54130.2		Calcium-binding endonuclease/exonuclease/phosphatase family
Glyma.02G222200	PF03372	PTHR12121,PTHR12121:SF44	KOG2338				AT5G54130.2		Calcium-binding endonuclease/exonuclease/phosphatase family
Glyma.02G222200	PF02365	PTHR31989,PTHR31989:SF5				GO:0006355,GO:0003677	AT4G35580.2	NTL9	NAC transcription factor-like 9
Glyma.02G222300	PF00274	PTHR11627		4.1.2.13	K01623	GO:0006096,GO:0004332	AT2G36460.1		Aldolase superfamily protein
Glyma.02G222400	PF01582,PF00931	PTHR11017,PTHR11017:SF171				GO:0007165,GO:0005515,GO:0043531	AT1G63860.1		Disease resistance protein (TIR-NBS-LRR class) family
Glyma.02G222500	PF00403	PTHR22814,PTHR22814:SF51	KOG1603			GO:0046872,GO:0030001	AT5G24580.1		Heavy metal transport/detoxification superfamily protein
Glyma.02G222600	PF00403	PTHR22814,PTHR22814:SF51	KOG1603			GO:0046872,GO:0030001	AT5G24580.1		Heavy metal transport/detoxification superfamily protein
Glyma.02G222600	PF00403	PTHR22814,PTHR22814:SF49	KOG1603			GO:0046872,GO:0030001	AT4G27590.1		Heavy metal transport/detoxification superfamily protein
Glyma.02G222700
Glyma.02G222800	PF06972	PTHR12758,PTHR12758:SF13					AT3G13222.1	GIP1	GBF-interacting protein 1
Glyma.02G222900	PF02536	PTHR13068,PTHR13068:SF24	KOG1267		K15032	GO:0006355,GO:0005739,GO:0003690	AT4G02990.1		Mitochondrial transcription termination factor family protein
Glyma.02G223000	PF02536	PTHR13068,PTHR13068:SF24	KOG1267		K15032	GO:0006355,GO:0005739,GO:0003690	AT4G02990.1		Mitochondrial transcription termination factor family protein
Glyma.02G223000	PF02536	PTHR13068,PTHR13068:SF24	KOG1267		K15032	GO:0006355,GO:0005739,GO:0003690	AT4G02990.1		Mitochondrial transcription termination factor family protein
Glyma.02G223000	PF00514	PTHR23315,PTHR23315:SF88		6.3.2.19	K08332	GO:0005515	AT4G12710.1		ARM repeat superfamily protein
Glyma.02G223100
Glyma.02G223200		PTHR31469,PTHR31469:SF2					AT4G12700.1
Glyma.02G223300		PTHR31469,PTHR31469:SF2					AT4G12700.1
Glyma.02G223300	PF00686,PF10150	PTHR30001,PTHR30001:SF1		3.1.26.12		GO:2001070,GO:0003723	AT2G04270.1	RNEE/G	RNAse E/G-like
Glyma.02G223400	PF10150	PTHR30001,PTHR30001:SF1		3.1.26.12		GO:0003723	AT2G04270.2	RNEE/G	RNAse E/G-like
Glyma.02G223400	PF10150	PTHR30001,PTHR30001:SF1		3.1.26.12		GO:0003723	AT2G04270.1	RNEE/G	RNAse E/G-like
Glyma.02G223400	PF10150	PTHR30001,PTHR30001:SF1		3.1.26.12		GO:0003723	AT2G04270.1	RNEE/G	RNAse E/G-like
Glyma.02G223400	PF10150	PTHR30001,PTHR30001:SF1		3.1.26.12		GO:0003723	AT2G04270.1	RNEE/G	RNAse E/G-like
Glyma.02G223400	PF00686,PF10150	PTHR30001,PTHR30001:SF1		3.1.26.12		GO:2001070,GO:0003723	AT2G04270.1	RNEE/G	RNAse E/G-like
Glyma.02G223400	PF10150	PTHR30001,PTHR30001:SF1		3.1.26.12		GO:0003723	AT2G04270.2	RNEE/G	RNAse E/G-like
Glyma.02G223400	PF10150	PTHR30001,PTHR30001:SF1		3.1.26.12		GO:0003723	AT2G04270.1	RNEE/G	RNAse E/G-like
Glyma.02G223400
Glyma.02G223500	PF13639	PTHR14155,PTHR14155:SF184			K16285	GO:0008270,GO:0005515	AT2G04240.1	XERICO	RING/U-box superfamily protein
Glyma.02G223600	PF06203	PTHR31717,PTHR31717:SF8				GO:0005515	AT5G48250.1		B-box type zinc finger protein with CCT domain
Glyma.02G223700	PF06203	PTHR31717,PTHR31717:SF8				GO:0005515	AT5G48250.1		B-box type zinc finger protein with CCT domain
Glyma.02G223700	PF06203	PTHR31717,PTHR31717:SF8				GO:0005515	AT5G48250.1		B-box type zinc finger protein with CCT domain
Glyma.02G223700	PF13812,PF01535,PF13041	PTHR24015,PTHR24015:SF911					AT1G14470.1		Pentatricopeptide repeat (PPR) superfamily protein
Glyma.02G223800	PF05910	PTHR31972,PTHR31972:SF2					AT2G04220.1		Plant protein of unknown function (DUF868)
Glyma.02G223900	PF07714	PTHR27003,PTHR27003:SF63	KOG1187	2.7.11.1		GO:0006468,GO:0004672	AT5G58940.1	CRCK1	calmodulin-binding receptor-like cytoplasmic kinase 1
Glyma.02G224000	PF15511	PTHR10484	KOG3467		K11254		AT1G07820.1		Histone superfamily protein
Glyma.02G224100	PF07690	PTHR11662,PTHR11662:SF226	KOG2532			GO:0055085,GO:0016021	AT3G46980.3	PHT4;3	phosphate transporter 4;3
Glyma.02G224200	PF03061	PTHR21660,PTHR21660:SF8	KOG3328	3.1.2.20	K17362		AT2G29590.1		Thioesterase superfamily protein
Glyma.02G224300	PF03061	PTHR21660,PTHR21660:SF8		3.1.2.20			AT2G29590.1		Thioesterase superfamily protein
Glyma.02G224300	PF05340	PTHR31659,PTHR31659:SF0					AT5G58930.1		Protein of unknown function (DUF740)
Glyma.02G224400
Glyma.02G224500	PF00854	PTHR11654,PTHR11654:SF166		3.6.3.43	K14638	GO:0016020,GO:0006810,GO:0005215	AT3G54140.1	ATPTR1,PTR1	peptide transporter 1
Glyma.02G224600	PF00295	PTHR31375,PTHR31375:SF37		3.2.1.15		GO:0005975,GO:0004650	AT5G48140.1		Pectin lyase-like superfamily protein
Glyma.02G224700	PF07732,PF07731,PF00394	PTHR11709,PTHR11709:SF103		1.10.3.2	K05909	GO:0005507,GO:0055114,GO:0016491	AT2G38080.1	ATLMCO4,IRX12,LAC4,LMCO4	Laccase/Diphenol oxidase family protein
Glyma.02G224800	PF07731,PF07732,PF00394	PTHR11709,PTHR11709:SF103		1.10.3.2		GO:0055114,GO:0016491,GO:0005507	AT2G38080.1	ATLMCO4,IRX12,LAC4,LMCO4	Laccase/Diphenol oxidase family protein
Glyma.02G224800	PF00249	PTHR24078,PTHR24078:SF279					AT5G58900.1		Homeodomain-like transcriptional regulator
Glyma.02G224900	PF01915,PF00933	PTHR30620,PTHR30620:SF33		3.2.1.58	K05349	GO:0005975,GO:0004553	AT3G47000.1		Glycosyl hydrolase family protein
Glyma.02G225000	PF01915,PF00933	PTHR30620,PTHR30620:SF33		3.2.1.58		GO:0005975,GO:0004553	AT3G47000.1		Glycosyl hydrolase family protein
Glyma.02G225000	PF01915,PF00933	PTHR30620,PTHR30620:SF33		3.2.1.58		GO:0005975,GO:0004553	AT3G47000.1		Glycosyl hydrolase family protein
Glyma.02G225000	PF01915,PF00933	PTHR30620,PTHR30620:SF33		3.2.1.58		GO:0005975,GO:0004553	AT3G47000.1		Glycosyl hydrolase family protein
Glyma.02G225000	PF01915,PF00933	PTHR30620,PTHR30620:SF33		3.2.1.58		GO:0005975,GO:0004553	AT3G47000.1		Glycosyl hydrolase family protein
Glyma.02G225000		PTHR22951,PTHR22951:SF18					AT4G40080.1		ENTH/ANTH/VHS superfamily protein
Glyma.02G225100		PTHR33870,PTHR33870:SF4					AT5G17910.2
Glyma.02G225200		PTHR33870,PTHR33870:SF4					AT5G17910.1
Glyma.02G225200	PF07724,PF06480,PF01434	PTHR23076,PTHR23076:SF70			K03798	GO:0005524,GO:0016021,GO:0008270,GO:0004222,GO:0006508	AT5G58870.1	ftsh9	FTSH protease 9
Glyma.02G225300	PF07724,PF06480,PF01434	PTHR23076,PTHR23076:SF70			K03798	GO:0005524,GO:0016021,GO:0008270,GO:0004222,GO:0006508	AT5G58870.1	ftsh9	FTSH protease 9
Glyma.02G225300	PF00400	PTHR22844,PTHR22844:SF206	KOG0645,KOG0279			GO:0005515	AT4G25440.1	ZFWD1	zinc finger WD40 repeat protein 1
Glyma.02G225400	PF00400	PTHR22844,PTHR22844:SF206	KOG1332			GO:0005515	AT4G25440.1	ZFWD1	zinc finger WD40 repeat protein 1
Glyma.02G225400	PF00400	PTHR22844,PTHR22844:SF206	KOG0645,KOG0279			GO:0005515	AT4G25440.1	ZFWD1	zinc finger WD40 repeat protein 1
Glyma.02G225400	PF00400	PTHR22844,PTHR22844:SF206	KOG0645,KOG0279			GO:0005515	AT4G25440.1	ZFWD1	zinc finger WD40 repeat protein 1
Glyma.02G225400	PF02099	PTHR13291	KOG2934	3.4.19.12	K15235	GO:0008242	AT2G29640.1	JOSL	JOSEPHIN-like protein
Glyma.02G225500		PTHR34355,PTHR34355:SF1		3.4.19.12			AT1G07300.1		josephin protein-related
Glyma.02G225600	PF13921	PTHR10641,PTHR10641:SF612	KOG0048		K09422		AT5G58850.1	ATMYB119,MYB119	myb domain protein 119
Glyma.02G225700	PF00201	PTHR11926,PTHR11926:SF374				GO:0016758,GO:0008152	AT1G07260.1	UGT71C3	UDP-glucosyl transferase 71C3
Glyma.02G225800		PTHR11926,PTHR11926:SF374				GO:0016758,GO:0008152	AT2G29730.1	UGT71D1	UDP-glucosyl transferase 71D1
Glyma.02G225900	PF00201	PTHR11926,PTHR11926:SF374				GO:0016758,GO:0008152	AT2G29730.1	UGT71D1	UDP-glucosyl transferase 71D1
Glyma.02G226000	PF00201	PTHR11926,PTHR11926:SF374				GO:0016758,GO:0008152	AT2G29730.1	UGT71D1	UDP-glucosyl transferase 71D1
Glyma.02G226000	PF00642,PF00076	PTHR23139	KOG0126		K13107	GO:0046872,GO:0003676	AT3G47120.1		RNA recognition motif (RRM)-containing protein
Glyma.02G226100	PF01255	PTHR10291,PTHR10291:SF6	KOG1602		K11778	GO:0016765	AT5G58770.1		Undecaprenyl pyrophosphate synthetase family protein
Glyma.02G226200		PTHR15169,PTHR15169:SF0	KOG4328		K10140		AT5G58760.1	DDB2	damaged DNA binding 2
Glyma.02G226300		PTHR15169,PTHR15169:SF0	KOG4328				AT5G58760.1	DDB2	damaged DNA binding 2
Glyma.02G226300	PF01061	PTHR19241,PTHR19241:SF169				GO:0016020	AT2G29940.1	ATPDR3,PDR3	pleiotropic drug resistance 3
Glyma.02G226400	PF01699	PTHR31503,PTHR31503:SF9	KOG1397		K07300	GO:0055085,GO:0016021	AT2G38170.3	ATCAX1,CAX1,RCI4	cation exchanger 1
Glyma.02G226500	PF00294	PTHR10584,PTHR10584:SF130	KOG2855			GO:0019140,GO:0010264,GO:0005524	AT5G58730.1		pfkB-like carbohydrate kinase family protein
Glyma.02G226600	PF10483	PTHR15641,PTHR15641:SF1				GO:0033588	AT2G18410.1
Glyma.02G226700	PF00168,PF09279,PF00387	PTHR10336,PTHR10336:SF105	KOG0169	3.1.4.11		GO:0005515,GO:0035556,GO:0007165,GO:0006629,GO:0004435	AT3G08510.1	ATPLC2,PLC2	phospholipase C 2
Glyma.02G226800	PF07724	PTHR11638,PTHR11638:SF68	KOG1051			GO:0005524	AT1G07200.2		Double Clp-N motif-containing P-loop nucleoside triphosphate hydrolases superfamily protein
Glyma.02G226900	PF07724	PTHR11638,PTHR11638:SF68	KOG1051			GO:0005524	AT1G07200.2		Double Clp-N motif-containing P-loop nucleoside triphosphate hydrolases superfamily protein
Glyma.02G226900	PF00642,PF13637	PTHR14493,PTHR14493:SF54	KOG1595			GO:0046872	AT5G58620.1		zinc finger (CCCH-type) family protein
Glyma.02G227000	PF00642,PF13637	PTHR14493,PTHR14493:SF54	KOG1595			GO:0046872	AT5G58620.1		zinc finger (CCCH-type) family protein
Glyma.02G227000		PTHR35499,PTHR35499:SF1					AT5G58630.1
Glyma.02G227100	PF11960,PF00487	PTHR32100,PTHR32100:SF20			K10257	GO:0055114,GO:0016717,GO:0006629	AT5G05580.1	FAD8	fatty acid desaturase 8
Glyma.02G227200	PF14432,PF01535,PF13041	PTHR24015,PTHR24015:SF339					AT1G19720.1		Pentatricopeptide repeat (PPR-like) superfamily protein
Glyma.02G227300
Glyma.02G227400	PF01419	PTHR23244,PTHR23244:SF249				GO:0080028,GO:0019762	AT1G19715.3		Mannose-binding lectin superfamily protein
Glyma.02G227500	PF10262	PTHR13544,PTHR13544:SF0	KOG3286				AT5G58640.1		Selenoprotein, Rdx type
Glyma.02G227600	PF00070	PTHR22912		1.6.5.9	K17871	GO:0055114,GO:0016491	AT1G07180.1	ATNDI1,NDA1	alternative NAD(P)H dehydrogenase 1
Glyma.02G227700	PF00070	PTHR22912		1.6.5.9	K17871	GO:0055114,GO:0016491	AT1G07180.1	ATNDI1,NDA1	alternative NAD(P)H dehydrogenase 1
Glyma.02G227700	PF00070	PTHR22912		1.6.5.9	K17871	GO:0055114,GO:0016491	AT1G07180.1	ATNDI1,NDA1	alternative NAD(P)H dehydrogenase 1
Glyma.02G227700	PF00070	PTHR22912		1.6.5.9	K17871	GO:0055114,GO:0016491	AT1G07180.1	ATNDI1,NDA1	alternative NAD(P)H dehydrogenase 1
Glyma.02G227700	PF00070	PTHR22912	KOG2495	1.6.5.9		GO:0055114,GO:0016491	AT2G29990.1	NDA2	alternative NAD(P)H dehydrogenase 2
Glyma.02G227700	PF00070	PTHR22912	KOG2495	1.6.5.9		GO:0055114,GO:0016491	AT2G29990.1	NDA2	alternative NAD(P)H dehydrogenase 2
Glyma.02G227700	PF00070	PTHR22912	KOG2495	1.6.5.9		GO:0055114,GO:0016491	AT2G29990.1	NDA2	alternative NAD(P)H dehydrogenase 2
Glyma.02G227700	PF00070	PTHR22912		1.6.5.9	K17871	GO:0055114,GO:0016491	AT1G07180.1	ATNDI1,NDA1	alternative NAD(P)H dehydrogenase 1
Glyma.02G227700	PF00070	PTHR22912	KOG2495	1.6.5.9		GO:0055114,GO:0016491	AT2G29990.1	NDA2	alternative NAD(P)H dehydrogenase 2
Glyma.02G227700	PF00070	PTHR22912		1.6.5.9	K17871	GO:0055114,GO:0016491	AT1G07180.1	ATNDI1,NDA1	alternative NAD(P)H dehydrogenase 1
Glyma.02G227700	PF00070	PTHR22912	KOG2495	1.6.5.9		GO:0055114,GO:0016491	AT2G29990.1	NDA2	alternative NAD(P)H dehydrogenase 2
Glyma.02G227700	PF00070	PTHR22912	KOG2495	1.6.5.9		GO:0055114,GO:0016491	AT2G29990.1	NDA2	alternative NAD(P)H dehydrogenase 2
Glyma.02G227700
Glyma.02G227800	PF00628,PF16135,PF05641	PTHR24098,PTHR24098:SF4		2.3.1.48		GO:0005515	AT5G58610.1		PHD finger transcription factor, putative
Glyma.02G227900	PF14416,PF13839	PTHR32285,PTHR32285:SF14					AT5G58600.1	PMR5,TBL44	Plant protein of unknown function (DUF828)
Glyma.02G228000	PF12481,PF00733	PTHR11772,PTHR11772:SF13		6.3.5.4	K01953	GO:0006529,GO:0004066	AT3G47340.1	ASN1,AT-ASN1,DIN6	glutamine-dependent asparagine synthase 1
Glyma.02G228100	PF12481,PF00733	PTHR11772,PTHR11772:SF13		6.3.5.4		GO:0006529,GO:0004066	AT3G47340.1	ASN1,AT-ASN1,DIN6	glutamine-dependent asparagine synthase 1
Glyma.02G228100	PF13537,PF00733	PTHR11772,PTHR11772:SF13		6.3.5.4		GO:0006529,GO:0004066	AT3G47340.1	ASN1,AT-ASN1,DIN6	glutamine-dependent asparagine synthase 1
Glyma.02G228100	PF00481	PTHR13832,PTHR13832:SF117	KOG0698	3.1.3.16	K17506	GO:0003824,GO:0006470,GO:0004722	AT2G30020.1		Protein phosphatase 2C family protein
Glyma.02G228200	PF00481	PTHR13832,PTHR13832:SF117		3.1.3.16		GO:0003824,GO:0006470,GO:0004722	AT2G30020.1		Protein phosphatase 2C family protein
Glyma.02G228200	PF00069	PTHR24361,PTHR24361:SF390	KOG0198	2.7.11.25		GO:0006468,GO:0005524,GO:0004672	AT2G30040.1	MAPKKK14	mitogen-activated protein kinase kinase kinase 14
Glyma.02G228300	PF09268,PF13838,PF01394,PF00637	PTHR10292,PTHR10292:SF10			K04646	GO:0030132,GO:0030130,GO:0016192,GO:0006886,GO:0005198	AT3G11130.1		Clathrin, heavy chain
Glyma.02G228400	PF09268,PF13838,PF01394,PF00637	PTHR10292,PTHR10292:SF10			K04646	GO:0030132,GO:0030130,GO:0016192,GO:0006886,GO:0005198	AT3G11130.1		Clathrin, heavy chain
Glyma.02G228400	PF02705	PTHR30540,PTHR30540:SF12			K03549	GO:0071805,GO:0016020,GO:0015079	AT2G30070.1	ATKT1,ATKT1P,ATKUP1,KT1,KUP1	potassium transporter 1
Glyma.02G228500	PF02705	PTHR30540,PTHR30540:SF12				GO:0071805,GO:0016020,GO:0015079	AT2G30070.1	ATKT1,ATKT1P,ATKUP1,KT1,KUP1	potassium transporter 1
Glyma.02G228500		PTHR31342,PTHR31342:SF9					AT1G07120.1
Glyma.02G228600		PTHR31342,PTHR31342:SF9					AT1G07120.1
Glyma.02G228600	PF00300,PF01591	PTHR10606,PTHR10606:SF44	KOG0234	2.7.1.105,3.1.3.46		GO:0006000,GO:0005524,GO:0003873,GO:0006003,GO:0003824	AT1G07110.1	ATF2KP,F2KP,FKFBP	fructose-2,6-bisphosphatase
Glyma.02G228700	PF13639	PTHR14155,PTHR14155:SF135	KOG4172			GO:0008270,GO:0005515	AT3G16720.1	ATL2,TL2	TOXICOS EN LEVADURA 2
Glyma.02G228800	PF04535	PTHR11615,PTHR11615:SF159					AT1G03700.1		Uncharacterised protein family (UPF0497)
Glyma.02G228900		PTHR33078					ATCG01280.1		Chloroplast Ycf2;ATPase, AAA type, core
Glyma.02G229000	PF05970	PTHR10492		3.6.4.12		GO:0006281,GO:0003678,GO:0000723	AT5G28780.1		PIF1 helicase
Glyma.02G229100	PF00583	PTHR23091,PTHR23091:SF221		2.3.1.88		GO:0008080	AT2G30090.1		Acyl-CoA N-acyltransferases (NAT) superfamily protein
Glyma.02G229200	PF00583	PTHR23091,PTHR23091:SF221		2.3.1.88		GO:0008080	AT2G30090.1		Acyl-CoA N-acyltransferases (NAT) superfamily protein
Glyma.02G229200	PF00240,PF02179	PTHR12329,PTHR12329:SF15	KOG4361			GO:0005515,GO:0051087	AT3G51780.1	ATBAG4,BAG4	BCL-2-associated athanogene 4
Glyma.02G229300	PF07719,PF13414	PTHR23083,PTHR23083:SF408					AT3G51770.1	ATEOL1,ETO1	tetratricopeptide repeat (TPR)-containing protein
Glyma.02G229400	PF13855,PF08263,PF00069	PTHR27001,PTHR27001:SF83	KOG1187	2.7.11.1		GO:0005515,GO:0006468,GO:0005524,GO:0004672	AT5G45840.2		Leucine-rich repeat protein kinase family protein
Glyma.02G229500	PF00462	PTHR10168,PTHR10168:SF68			K17479	GO:0045454,GO:0015035,GO:0009055	AT5G58530.1		Glutaredoxin family protein
Glyma.02G229600		PTHR37723,PTHR37723:SF1					AT2G37678.1	FHY1,FRY1,PAT3	far-red elongated hypocotyl 1
Glyma.07G134000	PF07731,PF07732,PF00394	PTHR11709,PTHR11709:SF62		1.10.3.2	K05909	GO:0055114,GO:0016491,GO:0005507	AT5G60020.1	ATLAC17,LAC17	laccase 17
Glyma.07G134100	PF07731,PF07732,PF00394	PTHR11709,PTHR11709:SF62		1.10.3.2		GO:0055114,GO:0016491,GO:0005507	AT5G60020.1	ATLAC17,LAC17	laccase 17
Glyma.07G134100							AT1G56233.1		Protein of unknown function (PD694200)
Glyma.07G134200	PF00026	PTHR13683,PTHR13683:SF347	KOG1339	3.4.23.12		GO:0006508,GO:0004190	AT5G02190.1	ATASP38,EMB24,PCS1	Eukaryotic aspartyl protease family protein
Glyma.07G134300	PF11708	PTHR12942,PTHR12942:SF2			K12819		AT1G65660.1	SMP1	Pre-mRNA splicing Prp18-interacting factor
Glyma.07G134400		PTHR36389,PTHR36389:SF1					AT5G02160.1
Glyma.07G134500	PF13639,PF14369,PF06547	PTHR22763,PTHR22763:SF26	KOG0320	6.3.2.19		GO:0008270,GO:0005515	AT2G39720.1	RHC2A	RING-H2 finger C2A
Glyma.07G134600	PF05970	PTHR10492		3.6.4.12		GO:0006281,GO:0003678,GO:0000723	AT3G51700.1		PIF1 helicase
Glyma.07G134700	PF02309,PF02362,PF06507	PTHR31384,PTHR31384:SF1			K14486	GO:0006355,GO:0005634,GO:0003677,GO:0009725	AT4G23980.1	ARF9	auxin response factor 9
Glyma.07G134800	PF02309	PTHR31384,PTHR31384:SF1				GO:0006355,GO:0005634	AT1G34410.1	ARF21	auxin response factor 21
Glyma.07G134900	PF03171,PF14226	PTHR10209,PTHR10209:SF184	KOG0143	1.14.11.31		GO:0055114,GO:0016491	AT3G21420.1		2-oxoglutarate (2OG) and Fe(II)-dependent oxygenase superfamily protein
Glyma.07G135000	PF00314	PTHR31048,PTHR31048:SF21					AT5G02140.1		Pathogenesis-related thaumatin superfamily protein
Glyma.07G135100
Glyma.07G135200
Glyma.07G135200
Glyma.07G135200
Glyma.07G135200		PTHR14154,PTHR14154:SF11					AT5G02120.1	OHP	one helix protein
Glyma.07G135300		PTHR14154,PTHR14154:SF11					AT5G02120.1	OHP	one helix protein
Glyma.07G135300	PF00069,PF00139	PTHR27007,PTHR27007:SF13	KOG1187	2.7.11.1		GO:0006468,GO:0005524,GO:0004672,GO:0030246	AT2G37710.1	RLK	receptor lectin kinase
Glyma.07G135400
Glyma.07G135500	PF00069,PF00139	PTHR27007,PTHR27007:SF27	KOG1187	2.7.11.1		GO:0006468,GO:0005524,GO:0004672,GO:0030246	AT3G55550.1		Concanavalin A-like lectin protein kinase family protein
Glyma.07G135600	PF11961,PF05003	PTHR31371,PTHR31371:SF3					AT3G23160.1		Protein of unknown function (DUF668)
Glyma.07G135700		PTHR26374					AT3G53820.1		C2H2 and C2HC zinc fingers superfamily protein
Glyma.07G135800		PTHR26374,PTHR26374:SF167					AT2G37740.1	ATZFP10,ZFP10	zinc-finger protein 10
Glyma.07G135900	PF08659	PTHR24322,PTHR24322:SF593	KOG0725	1.1.1.206	K08081		AT5G06060.1		NAD(P)-binding Rossmann-fold superfamily protein
Glyma.07G136000	PF13561	PTHR24322,PTHR24322:SF593	KOG0725	1.1.1.206	K08081		AT5G06060.1		NAD(P)-binding Rossmann-fold superfamily protein
Glyma.07G136100	PF08659	PTHR24322,PTHR24322:SF593	KOG0725	1.1.1.206	K08081		AT5G06060.1		NAD(P)-binding Rossmann-fold superfamily protein
Glyma.07G136200
Glyma.07G136300
Glyma.07G136300	PF13561	PTHR24322,PTHR24322:SF593		1.1.1.206	K08081		AT5G06060.1		NAD(P)-binding Rossmann-fold superfamily protein
Glyma.07G136400	PF00415	PTHR22870,PTHR22870:SF202	KOG1427				AT3G53830.1		Regulator of chromosome condensation (RCC1) family protein
Glyma.07G136500	PF00415	PTHR22870,PTHR22870:SF202	KOG1427				AT3G53830.1		Regulator of chromosome condensation (RCC1) family protein
Glyma.07G136500	PF14215	PTHR13902,PTHR13902:SF5					AT2G31280.1	CPUORF7	conserved peptide upstream open reading frame 7
Glyma.07G136600	PF14215	PTHR13902,PTHR13902:SF5					AT2G31280.1	CPUORF7	conserved peptide upstream open reading frame 7
Glyma.07G136600	PF14215	PTHR13902,PTHR13902:SF5					AT2G31280.1	CPUORF7	conserved peptide upstream open reading frame 7
Glyma.07G136600	PF14215	PTHR13902,PTHR13902:SF5					AT2G31280.3	CPUORF7	conserved peptide upstream open reading frame 7
Glyma.07G136600	PF14215	PTHR13902,PTHR13902:SF5					AT2G31280.1	CPUORF7	conserved peptide upstream open reading frame 7
Glyma.07G136600
Glyma.07G136700		PTHR34670,PTHR34670:SF3					AT2G37750.1
Glyma.07G136800	PF13947,PF00069	PTHR27005,PTHR27005:SF11	KOG1187	2.7.11.1		GO:0030247,GO:0006468,GO:0005524,GO:0004672	AT3G53840.1		Protein kinase superfamily protein
Glyma.07G136900	PF13947,PF00069	PTHR27005,PTHR27005:SF11	KOG1187	2.7.11.1		GO:0030247,GO:0006468,GO:0005524,GO:0004672	AT3G53840.1		Protein kinase superfamily protein
Glyma.07G136900	PF13947,PF00069	PTHR27005,PTHR27005:SF11	KOG1187	2.7.11.1		GO:0030247,GO:0006468,GO:0005524,GO:0004672	AT5G02070.1		Protein kinase family protein
Glyma.07G137000	PF02330	PTHR10826,PTHR10826:SF12	KOG2536		K15414	GO:0005759	AT5G02050.1		Mitochondrial glycoprotein family protein
Glyma.07G137100	PF00248	PTHR11732,PTHR11732:SF279	KOG1577				AT2G37770.2		NAD(P)-linked oxidoreductase superfamily protein
Glyma.07G137200	PF00696	PTHR11063,PTHR11063:SF13		1.2.1.41,2.7.2.11	K12657		AT3G55610.1	P5CS2	delta 1-pyrroline-5-carboxylate synthase 2
Glyma.07G137300	PF00696	PTHR11063,PTHR11063:SF13		1.2.1.41,2.7.2.11	K12657		AT3G55610.1	P5CS2	delta 1-pyrroline-5-carboxylate synthase 2
Glyma.07G137300	PF00696	PTHR11063,PTHR11063:SF13		1.2.1.41,2.7.2.11			AT3G55610.1	P5CS2	delta 1-pyrroline-5-carboxylate synthase 2
Glyma.07G137300	PF00696	PTHR11063,PTHR11063:SF13		1.2.1.41,2.7.2.11			AT3G55610.1	P5CS2	delta 1-pyrroline-5-carboxylate synthase 2
Glyma.07G137300	PF00696	PTHR11063,PTHR11063:SF13		1.2.1.41,2.7.2.11			AT3G55610.1	P5CS2	delta 1-pyrroline-5-carboxylate synthase 2
Glyma.07G137300	PF00696	PTHR11063,PTHR11063:SF13		1.2.1.41,2.7.2.11			AT3G55610.1	P5CS2	delta 1-pyrroline-5-carboxylate synthase 2
Glyma.07G137300	PF08326	PTHR18866,PTHR18866:SF106		6.4.1.2,6.3.4.14		GO:0006633,GO:0005524,GO:0003989	AT1G36180.1	ACC2	acetyl-CoA carboxylase 2
Glyma.07G137400	PF05056	PTHR33103,PTHR33103:SF4					AT5G01120.1		Protein of unknown function (DUF674)
Glyma.07G137500
Glyma.07G137600
Glyma.07G137600
Glyma.07G137700	PF05056	PTHR33103,PTHR33103:SF4					AT3G09110.1		Protein of unknown function (DUF674)
Glyma.07G137800
Glyma.07G137900
Glyma.07G137900
Glyma.07G138000
Glyma.07G138100
Glyma.07G138200	PF03208	PTHR12859	KOG4050				AT5G02040.1	PRA1.A1	prenylated RAB acceptor 1.A1
Glyma.07G138300	PF03208	PTHR12859					AT5G02040.1	PRA1.A1	prenylated RAB acceptor 1.A1
Glyma.07G138300	PF11891	PTHR31038,PTHR31038:SF1					AT2G37860.3	LCD1	Protein of unknown function (DUF3411)
Glyma.07G138400	PF14291	PTHR11697					AT1G19260.1		TTF-type zinc finger protein with HAT dimerisation domain
Glyma.07G138500	PF07859	PTHR23024,PTHR23024:SF193	KOG1515	4.2.1.105,3.1.1.1		GO:0016787,GO:0008152	AT1G19190.1		alpha/beta-Hydrolases superfamily protein
Glyma.07G138600	PF02892,PF05699,PF14372	PTHR23272,PTHR23272:SF52	KOG1121			GO:0003677,GO:0046983	AT3G42170.1		BED zinc finger ;hAT family dimerisation domain
Glyma.07G138700	PF04759	PTHR31696,PTHR31696:SF23					AT2G37880.1		Protein of unknown function, DUF617
Glyma.07G138800	PF01221	PTHR11886,PTHR11886:SF46	KOG3430	3.6.4.2	K10418	GO:0007017,GO:0005875	AT1G52240.2	ATROPGEF11,PIRF1,ROPGEF11	RHO guanyl-nucleotide exchange factor 11
Glyma.07G138900	PF00153	PTHR24089,PTHR24089:SF307	KOG0752				AT3G53940.1		Mitochondrial substrate carrier family protein
Glyma.07G139000	PF00153	PTHR24089,PTHR24089:SF307					AT3G53940.1		Mitochondrial substrate carrier family protein
Glyma.07G139000	PF00153	PTHR24089,PTHR24089:SF307					AT3G53940.1		Mitochondrial substrate carrier family protein
Glyma.07G139000	PF00153	PTHR24089,PTHR24089:SF307					AT3G55640.1		Mitochondrial substrate carrier family protein
Glyma.07G139000	PF00153	PTHR24089,PTHR24089:SF307					AT3G55640.1		Mitochondrial substrate carrier family protein
Glyma.07G139000	PF00153	PTHR24089,PTHR24089:SF307					AT3G53940.1		Mitochondrial substrate carrier family protein
Glyma.07G139000	PF00153	PTHR24089,PTHR24089:SF307					AT3G53940.1		Mitochondrial substrate carrier family protein
Glyma.07G139000	PF00153	PTHR24089,PTHR24089:SF307					AT3G53940.1		Mitochondrial substrate carrier family protein
Glyma.07G139000	PF00153	PTHR24089,PTHR24089:SF307					AT3G55640.1		Mitochondrial substrate carrier family protein
Glyma.07G139000	PF07690	PTHR11654,PTHR11654:SF79			K14638	GO:0055085,GO:0016021,GO:0016020,GO:0006810,GO:0005215	AT2G37900.1		Major facilitator superfamily protein
Glyma.07G139100	PF07690	PTHR11654,PTHR11654:SF79				GO:0055085,GO:0016021,GO:0016020,GO:0006810,GO:0005215	AT2G37900.1		Major facilitator superfamily protein
Glyma.07G139100		PTHR37078,PTHR37078:SF1
Glyma.07G139200		PTHR33738,PTHR33738:SF3					AT5G02020.1
Glyma.07G139300	PF14368	PTHR33122,PTHR33122:SF6					AT3G53980.1		Bifunctional inhibitor/lipid-transfer protein/seed storage 2S albumin superfamily protein
Glyma.07G139400	PF03759	PTHR33101,PTHR33101:SF1				GO:0005089	AT5G02010.1	ATROPGEF7,ROPGEF7	RHO guanyl-nucleotide exchange factor 7
Glyma.07G139500	PF03759	PTHR33101,PTHR33101:SF1				GO:0005089	AT5G02010.1	ATROPGEF7,ROPGEF7	RHO guanyl-nucleotide exchange factor 7
Glyma.07G139500	PF00043,PF02798	PTHR11260,PTHR11260:SF314	KOG0406	2.5.1.18	K00799	GO:0005515	AT2G29420.1	ATGSTU7,GST25,GSTU7	glutathione S-transferase tau 7
Glyma.07G139600	PF00043,PF02798	PTHR11260,PTHR11260:SF314	KOG0406	2.5.1.18	K00799	GO:0005515	AT3G09270.1	ATGSTU8,GSTU8	glutathione S-transferase TAU 8
Glyma.07G139700	PF00043,PF02798	PTHR11260,PTHR11260:SF314	KOG0406	2.5.1.18	K00799	GO:0005515	AT3G09270.1	ATGSTU8,GSTU8	glutathione S-transferase TAU 8
Glyma.07G139800	PF00043,PF02798	PTHR11260,PTHR11260:SF314	KOG0406	2.5.1.18	K00799	GO:0005515	AT3G09270.1	ATGSTU8,GSTU8	glutathione S-transferase TAU 8
Glyma.07G139900	PF02798,PF00043	PTHR11260,PTHR11260:SF314	KOG0406	2.5.1.18	K00799	GO:0005515	AT2G29420.1	ATGSTU7,GST25,GSTU7	glutathione S-transferase tau 7
Glyma.07G140000	PF00043,PF02798	PTHR11260,PTHR11260:SF314	KOG0406	2.5.1.18	K00799	GO:0005515	AT3G09270.1	ATGSTU8,GSTU8	glutathione S-transferase TAU 8
Glyma.07G140100	PF00043,PF13417	PTHR11260,PTHR11260:SF314	KOG0406	2.5.1.18	K00799	GO:0005515	AT2G29420.1	ATGSTU7,GST25,GSTU7	glutathione S-transferase tau 7
Glyma.07G140200	PF02798	PTHR11260,PTHR11260:SF303		2.5.1.18		GO:0005515	AT2G29420.1	ATGSTU7,GST25,GSTU7	glutathione S-transferase tau 7
Glyma.07G140300	PF00043,PF02798	PTHR11260,PTHR11260:SF314	KOG0406	2.5.1.18	K00799	GO:0005515	AT3G09270.1	ATGSTU8,GSTU8	glutathione S-transferase TAU 8
Glyma.07G140400	PF00043,PF02798	PTHR11260,PTHR11260:SF314	KOG0406	2.5.1.18	K00799	GO:0005515	AT3G09270.1	ATGSTU8,GSTU8	glutathione S-transferase TAU 8
Glyma.07G140400	PF00043,PF02798	PTHR11260,PTHR11260:SF314	KOG0406	2.5.1.18		GO:0005515	AT3G09270.1	ATGSTU8,GSTU8	glutathione S-transferase TAU 8
Glyma.07G140500		PTHR33054,PTHR33054:SF7
Glyma.07G140600	PF00043,PF02798	PTHR11260,PTHR11260:SF314	KOG0406	2.5.1.18	K00799	GO:0005515	AT3G09270.1	ATGSTU8,GSTU8	glutathione S-transferase TAU 8
Glyma.07G140700	PF00582	PTHR31964,PTHR31964:SF23				GO:0006950	AT3G53990.1		Adenine nucleotide alpha hydrolases-like superfamily protein
Glyma.07G140800	PF00582	PTHR31964,PTHR31964:SF23				GO:0006950	AT3G53990.1		Adenine nucleotide alpha hydrolases-like superfamily protein
Glyma.07G140800	PF14303	PTHR11260,PTHR11260:SF321		2.5.1.18			AT5G41240.1	ATGSTT2,GST10B,GSTT2	glutathione S-transferase THETA 2
Glyma.07G140900		PTHR33356,PTHR33356:SF5					AT3G54000.1
Glyma.07G141000	PF00249	PTHR10641,PTHR10641:SF526	KOG0048		K09422		AT1G66370.1	AtMYB113,MYB113	myb domain protein 113
Glyma.07G141100	PF04145	PTHR12483,PTHR12483:SF41	KOG3386			GO:0035434,GO:0016021,GO:0005375	AT5G59030.1	COPT1	copper transporter 1
Glyma.07G141200	PF14368	PTHR33122,PTHR33122:SF4					AT5G55410.2		Bifunctional inhibitor/lipid-transfer protein/seed storage 2S albumin superfamily protein
Glyma.07G141300	PF13855	PTHR27004,PTHR27004:SF21	KOG4308,KOG0472	2.7.11.1		GO:0005515	AT2G34930.1		disease resistance family protein / LRR family protein
Glyma.07G141400	PF14368	PTHR33122,PTHR33122:SF4					AT5G55410.2		Bifunctional inhibitor/lipid-transfer protein/seed storage 2S albumin superfamily protein
Glyma.07G141500	PF04145	PTHR12483,PTHR12483:SF24	KOG3386			GO:0035434,GO:0016021,GO:0005375	AT2G26975.1		Ctr copper transporter family
Glyma.07G141600	PF00011	PTHR11527,PTHR11527:SF158	KOG0710		K13993		AT1G07400.1		HSP20-like chaperones superfamily protein
Glyma.07G141700
Glyma.07G141800	PF12043	PTHR31390,PTHR31390:SF0					AT5G01030.2		Protein of unknown function (DUF3527)
Glyma.07G141900	PF12043	PTHR31390,PTHR31390:SF0					AT5G01030.1		Protein of unknown function (DUF3527)
Glyma.07G141900	PF12043	PTHR31390,PTHR31390:SF0					AT5G01030.1		Protein of unknown function (DUF3527)
Glyma.07G141900	PF12043	PTHR31390,PTHR31390:SF0					AT5G01030.1		Protein of unknown function (DUF3527)
Glyma.07G141900	PF14360	PTHR21290,PTHR21290:SF29	KOG3058				AT3G54020.1	AtIPCS1	Arabidopsis Inositol phosphorylceramide synthase 1
Glyma.07G142000				3.4.19.12			AT3G54130.1		Josephin family protein
Glyma.07G142100
Glyma.07G142200	PF12906	PTHR23012,PTHR23012:SF87				GO:0008270	AT5G05830.1		RING/FYVE/PHD zinc finger superfamily protein
Glyma.07G142300	PF12906	PTHR23012,PTHR23012:SF87				GO:0008270	AT5G05830.1		RING/FYVE/PHD zinc finger superfamily protein
Glyma.07G142300	PF12906	PTHR23012,PTHR23012:SF87				GO:0008270	AT5G05830.1		RING/FYVE/PHD zinc finger superfamily protein
Glyma.07G142300	PF00394,PF07731,PF07732	PTHR11709,PTHR11709:SF9		1.10.3.2	K05909	GO:0055114,GO:0016491,GO:0005507	AT3G09220.1	LAC7	laccase 7
Glyma.07G142400	PF00394,PF07732,PF07731	PTHR11709,PTHR11709:SF9		1.10.3.2	K05909	GO:0055114,GO:0016491,GO:0005507	AT5G01050.1		Laccase/Diphenol oxidase family protein
Glyma.07G142500	PF00394,PF07732,PF07731	PTHR11709,PTHR11709:SF9		1.10.3.2	K05909	GO:0055114,GO:0016491,GO:0005507	AT5G01050.1		Laccase/Diphenol oxidase family protein
Glyma.07G142600	PF00316	PTHR11556,PTHR11556:SF16		3.1.3.11	K03841	GO:0042578,GO:0042132,GO:0005975	AT3G54050.1	HCEF1	high cyclic electron flow 1
Glyma.07G142700		PTHR35117					AT2G37960.2
Glyma.07G142800	PF00560	PTHR27004,PTHR27004:SF11				GO:0005515	AT2G25470.1	AtRLP21,RLP21	receptor like protein 21
Glyma.07G142900	PF00139	PTHR32401,PTHR32401:SF7		2.7.11.1		GO:0030246	AT5G01090.1		Concanavalin A-like lectin family protein
Glyma.07G143000		PTHR15852,PTHR15852:SF20	KOG2813				AT2G38000.1		chaperone protein dnaJ-related
Glyma.07G143100	PF01612	PTHR13620		3.6.4.12		GO:0008408,GO:0006139,GO:0003676	AT4G13870.2	ATWEX,ATWRNEXO,WEX,WRNEXO	Werner syndrome-like exonuclease
Glyma.07G143200	PF05056	PTHR33103					AT5G37320.1		Protein of unknown function (DUF674)
Glyma.07G143300		PTHR10366,PTHR10366:SF471		1.1.1.170			AT2G26260.1	3BETAHSD/D2,AT3BETAHSD/D2	3beta-hydroxysteroid-dehydrogenase/decarboxylase isoform 2
Glyma.07G143400	PF08263,PF00560,PF13855	PTHR27004,PTHR27004:SF11	KOG0472	2.7.11.1		GO:0005515	AT1G74170.1	AtRLP13,RLP13	receptor like protein 13
Glyma.07G143500	PF05056	PTHR33103,PTHR33103:SF4
Glyma.07G143600	PF01612	PTHR13620		3.6.4.12		GO:0008408,GO:0006139,GO:0003676	AT4G13870.2	ATWEX,ATWRNEXO,WEX,WRNEXO	Werner syndrome-like exonuclease
Glyma.07G143700	PF00223	PTHR30128,PTHR30128:SF8		1.97.1.12	K02689	GO:0016021,GO:0015979,GO:0009579,GO:0009522	ATCG00350.1		Photosystem I, PsaA/PsaB protein
Glyma.07G143800	PF00560,PF13855	PTHR27004,PTHR27004:SF11	KOG0472	2.7.11.1		GO:0005515	AT1G74190.1	AtRLP15,RLP15	receptor like protein 15
Glyma.07G143900	PF08263	PTHR27004,PTHR27004:SF11		3.2.1.15			AT2G25470.1	AtRLP21,RLP21	receptor like protein 21
Glyma.07G144000	PF08263,PF00560,PF13855	PTHR27004,PTHR27004:SF11	KOG0472	2.7.11.1		GO:0005515	AT1G74170.1	AtRLP13,RLP13	receptor like protein 13
Glyma.07G144100	PF08263,PF00560,PF13855	PTHR27004,PTHR27004:SF11	KOG0472	2.7.11.1		GO:0005515	AT1G74170.1	AtRLP13,RLP13	receptor like protein 13
Glyma.07G144100	PF08263,PF00560,PF13855	PTHR27004,PTHR27004:SF11	KOG0472	2.7.11.1		GO:0005515	AT1G74170.1	AtRLP13,RLP13	receptor like protein 13
Glyma.07G144100	PF00153	PTHR24089,PTHR24089:SF349	KOG0753		K15103		AT3G54110.1	ATPUMP1,ATUCP1,PUMP1,UCP,UCP1	plant uncoupling mitochondrial protein 1
Glyma.07G144200		PTHR13480	KOG2932		K15685		AT5G01160.1		RING/U-box superfamily protein
Glyma.07G144300	PF06966	PTHR10556,PTHR10556:SF37	KOG1638	1.3.1.22	K09591		AT2G38050.1	ATDET2,DET2,DWF6	3-oxo-5-alpha-steroid 4-dehydrogenase family protein
Glyma.07G144400	PF01068,PF00782,PF03919	PTHR10367,PTHR10367:SF11	KOG2386	2.1.1.56	K13917	GO:0006310,GO:0006281,GO:0005524,GO:0003910,GO:0008138,GO:0006470,GO:0004484	AT3G09100.2		mRNA capping enzyme family protein
Glyma.07G144500	PF01068,PF00782,PF03919	PTHR10367,PTHR10367:SF11	KOG2386	2.1.1.56	K13917	GO:0006310,GO:0006281,GO:0005524,GO:0003910,GO:0008138,GO:0006470,GO:0004484	AT3G09100.2		mRNA capping enzyme family protein
Glyma.07G144500	PF06127	PTHR34205,PTHR34205:SF2					AT3G09085.1		Protein of unknown function (DUF962)
Glyma.07G144600	PF06127	PTHR34205,PTHR34205:SF2					AT3G09085.1		Protein of unknown function (DUF962)
Glyma.07G144600	PF06127	PTHR34205,PTHR34205:SF2					AT3G09085.1		Protein of unknown function (DUF962)
Glyma.07G144600	PF00083	PTHR11662,PTHR11662:SF235	KOG2532	3.6.3.27		GO:0055085,GO:0022857,GO:0016021	AT2G38060.1	PHT4;2	phosphate transporter 4;2
Glyma.07G144700	PF00083	PTHR11662,PTHR11662:SF235		3.6.3.27		GO:0055085,GO:0022857,GO:0016021	AT2G38060.1	PHT4;2	phosphate transporter 4;2
Glyma.07G144700	PF00400	PTHR22847,PTHR22847:SF430				GO:0005515	AT3G09080.1		Transducin/WD40 repeat-like superfamily protein
Glyma.07G144800	PF00400	PTHR22847,PTHR22847:SF430	KOG1408			GO:0005515	AT3G09080.1		Transducin/WD40 repeat-like superfamily protein
Glyma.07G144800	PF00400	PTHR22847,PTHR22847:SF430	KOG1408			GO:0005515	AT3G09080.1		Transducin/WD40 repeat-like superfamily protein
Glyma.07G144800	PF00400	PTHR22847,PTHR22847:SF430				GO:0005515	AT3G09080.1		Transducin/WD40 repeat-like superfamily protein
Glyma.07G144800	PF05340	PTHR31659,PTHR31659:SF8					AT3G09070.1		Protein of unknown function (DUF740)
Glyma.07G144900	PF01107	PTHR33054,PTHR33054:SF7
Glyma.07G145000	PF01107	PTHR33054,PTHR33054:SF7
Glyma.07G145100		PTHR33054,PTHR33054:SF3
Glyma.07G145200	PF05340	PTHR31659,PTHR31659:SF8					AT5G01170.1		Protein of unknown function (DUF740)
Glyma.07G145300	PF14381	PTHR23257,PTHR23257:SF349		2.7.11.1			AT4G24480.1		Protein kinase superfamily protein
Glyma.07G145400
Glyma.07G145500		PTHR22970,PTHR22970:SF23					AT5G04110.1	GYRB3	DNA GYRASE B3
Glyma.07G145600	PF01535,PF13041	PTHR24015,PTHR24015:SF626					AT3G09060.1		Pentatricopeptide repeat (PPR) superfamily protein
Glyma.07G145700		PTHR35731,PTHR35731:SF1					AT3G09050.1
Glyma.07G145800	PF07690	PTHR11654,PTHR11654:SF125		3.6.3.43	K14638	GO:0055085,GO:0016021,GO:0016020,GO:0006810,GO:0005215	AT3G54140.1	ATPTR1,PTR1	peptide transporter 1
Glyma.07G145900	PF07690	PTHR11654,PTHR11654:SF125		3.6.3.43	K14638	GO:0055085,GO:0016021,GO:0016020,GO:0006810,GO:0005215	AT3G54140.1	ATPTR1,PTR1	peptide transporter 1
Glyma.07G145900	PF07690	PTHR11654,PTHR11654:SF125		3.6.3.43	K14638	GO:0055085,GO:0016021,GO:0016020,GO:0006810,GO:0005215	AT3G54140.1	ATPTR1,PTR1	peptide transporter 1
Glyma.07G145900	PF07690	PTHR11654,PTHR11654:SF125		3.6.3.43	K14638	GO:0055085,GO:0016021,GO:0016020,GO:0006810,GO:0005215	AT3G54140.1	ATPTR1,PTR1	peptide transporter 1
Glyma.07G145900	PF00394,PF07731	PTHR11709,PTHR11709:SF103		1.10.3.2		GO:0055114,GO:0016491,GO:0005507	AT5G01190.1	LAC10	laccase 10
Glyma.07G146000	PF04937	PTHR32166					AT4G15020.2		hAT transposon superfamily
Glyma.07G146100	PF14244	PTHR37610,PTHR37610:SF1					AT1G21280.1
Glyma.07G146200	PF00249	PTHR24078,PTHR24078:SF261	KOG0724				AT2G38090.1		Duplicated homeodomain-like superfamily protein
Glyma.07G146300	PF13579,PF00534	PTHR12526,PTHR12526:SF340	KOG1111		K06119		AT5G01220.1	SQD2	sulfoquinovosyldiacylglycerol 2
Glyma.07G146400	PF00534	PTHR12526,PTHR12526:SF340					AT5G01220.1	SQD2	sulfoquinovosyldiacylglycerol 2
Glyma.07G146400	PF00534	PTHR12526,PTHR12526:SF340					AT5G01220.1	SQD2	sulfoquinovosyldiacylglycerol 2
Glyma.07G146400	PF00534	PTHR12526,PTHR12526:SF340					AT5G01220.1	SQD2	sulfoquinovosyldiacylglycerol 2
Glyma.07G146400	PF00534	PTHR12526,PTHR12526:SF340					AT5G01220.1	SQD2	sulfoquinovosyldiacylglycerol 2
Glyma.07G146400		PTHR34355,PTHR34355:SF1					AT3G09032.1
Glyma.07G146500	PF00854	PTHR11654,PTHR11654:SF79			K14638	GO:0016020,GO:0006810,GO:0005215	AT2G38100.1		proton-dependent oligopeptide transport (POT) family protein
Glyma.07G146600	PF14214,PF05970	PTHR10492	KOG0987	3.6.4.12		GO:0006281,GO:0003678,GO:0000723	AT3G51690.1		PIF1 helicase
Glyma.07G146700	PF12710,PF01553	PTHR15486,PTHR15486:SF20		2.3.1.198,2.3.1.15	K13508	GO:0016746,GO:0008152	AT2G38110.1	ATGPAT6,GPAT6	glycerol-3-phosphate acyltransferase 6
Glyma.07G146800
Glyma.07G146900	PF01490	PTHR22950,PTHR22950:SF256	KOG1303		K13946		AT2G38120.1	AUX1,MAP1,PIR1,WAV5	Transmembrane amino acid transporter family protein
Glyma.07G147000	PF01490	PTHR22950,PTHR22950:SF256	KOG1303		K13946		AT2G38120.1	AUX1,MAP1,PIR1,WAV5	Transmembrane amino acid transporter family protein
Glyma.07G147000	PF01490	PTHR22950,PTHR22950:SF256	KOG1303		K13946		AT2G38120.1	AUX1,MAP1,PIR1,WAV5	Transmembrane amino acid transporter family protein
Glyma.07G147000	PF01490	PTHR22950,PTHR22950:SF256	KOG1303		K13946		AT2G38120.1	AUX1,MAP1,PIR1,WAV5	Transmembrane amino acid transporter family protein
Glyma.07G147000	PF01490	PTHR22950,PTHR22950:SF256	KOG1303		K13946		AT2G38120.1	AUX1,MAP1,PIR1,WAV5	Transmembrane amino acid transporter family protein
Glyma.07G147000	PF01490	PTHR22950,PTHR22950:SF256	KOG1303		K13946		AT2G38120.1	AUX1,MAP1,PIR1,WAV5	Transmembrane amino acid transporter family protein
Glyma.07G147000
Glyma.07G147100	PF03140	PTHR31549,PTHR31549:SF12					AT3G50170.1		Plant protein of unknown function (DUF247)
Glyma.07G147200
Glyma.07G147300	PF01535,PF12854,PF13041	PTHR24015,PTHR24015:SF32					AT4G28010.1		Tetratricopeptide repeat (TPR)-like superfamily protein
Glyma.07G147400
Glyma.07G147500	PF04488,PF04572	PTHR12042,PTHR12042:SF18	KOG1928		K01988		AT2G38150.1		alpha 1,4-glycosyltransferase family protein
Glyma.07G147600	PF00646,PF01167	PTHR16517,PTHR16517:SF31				GO:0005515	AT1G76900.2	AtTLP1,TLP1	tubby like protein 1
Glyma.07G147700	PF08263,PF13855,PF00069	PTHR27000,PTHR27000:SF114	KOG1187	2.7.11.1		GO:0005515,GO:0006468,GO:0005524,GO:0004672	AT3G47570.1		Leucine-rich repeat protein kinase family protein
Glyma.07G147800	PF08263,PF00069	PTHR27000,PTHR27000:SF114	KOG1187	2.7.11.1		GO:0006468,GO:0005524,GO:0004672	AT3G47570.1		Leucine-rich repeat protein kinase family protein
Glyma.07G147800		PTHR27000,PTHR27000:SF114		2.7.11.1			AT3G47580.1		Leucine-rich repeat protein kinase family protein
Glyma.07G147900	PF00686	PTHR10357,PTHR10357:SF149		3.2.1.3		GO:2001070,GO:0003824	AT5G01260.2		Carbohydrate-binding-like fold
Glyma.07G148000	PF03031,PF00035	PTHR23081,PTHR23081:SF1	KOG0323	3.1.3.16	K18998		AT5G01270.2	ATCPL2,CPL2	carboxyl-terminal domain (ctd) phosphatase-like 2
Glyma.07G148100	PF03031,PF00035	PTHR23081,PTHR23081:SF1	KOG0323	3.1.3.16			AT5G01270.2	ATCPL2,CPL2	carboxyl-terminal domain (ctd) phosphatase-like 2
Glyma.07G148100	PF03031,PF00035	PTHR23081,PTHR23081:SF1	KOG0323	3.1.3.16			AT5G01270.2	ATCPL2,CPL2	carboxyl-terminal domain (ctd) phosphatase-like 2
Glyma.07G148100	PF03031,PF00035	PTHR23081,PTHR23081:SF1	KOG0323	3.1.3.16	K18998		AT5G01270.2	ATCPL2,CPL2	carboxyl-terminal domain (ctd) phosphatase-like 2
Glyma.07G148100	PF03031,PF00035	PTHR23081,PTHR23081:SF1	KOG0323	3.1.3.16	K18998		AT5G01270.2	ATCPL2,CPL2	carboxyl-terminal domain (ctd) phosphatase-like 2
Glyma.07G148100	PF03031,PF00035	PTHR23081,PTHR23081:SF1	KOG0323	3.1.3.16	K18998		AT5G01270.2	ATCPL2,CPL2	carboxyl-terminal domain (ctd) phosphatase-like 2
Glyma.07G148100	PF03031,PF00035	PTHR23081,PTHR23081:SF1	KOG0323	3.1.3.16	K18998		AT5G01270.2	ATCPL2,CPL2	carboxyl-terminal domain (ctd) phosphatase-like 2
Glyma.07G148100	PF03031,PF00035	PTHR23081,PTHR23081:SF1	KOG0323	3.1.3.16	K18998		AT5G01270.2	ATCPL2,CPL2	carboxyl-terminal domain (ctd) phosphatase-like 2
Glyma.07G148100	PF03031,PF00035	PTHR23081,PTHR23081:SF1	KOG0323	3.1.3.16	K18998		AT5G01270.2	ATCPL2,CPL2	carboxyl-terminal domain (ctd) phosphatase-like 2
Glyma.07G148100	PF03031,PF00035	PTHR23081,PTHR23081:SF1	KOG0323	3.1.3.16	K18998		AT5G01270.2	ATCPL2,CPL2	carboxyl-terminal domain (ctd) phosphatase-like 2
Glyma.07G148100	PF03031,PF00035	PTHR23081,PTHR23081:SF1	KOG0323	3.1.3.16	K18998		AT5G01270.2	ATCPL2,CPL2	carboxyl-terminal domain (ctd) phosphatase-like 2
Glyma.07G148100	PF03031,PF00035	PTHR23081,PTHR23081:SF1	KOG0323	3.1.3.16			AT5G01270.2	ATCPL2,CPL2	carboxyl-terminal domain (ctd) phosphatase-like 2
Glyma.07G148100	PF03031,PF00035	PTHR23081,PTHR23081:SF1	KOG0323	3.1.3.16	K18998		AT5G01270.2	ATCPL2,CPL2	carboxyl-terminal domain (ctd) phosphatase-like 2
Glyma.07G148100	PF03031,PF00035	PTHR23081,PTHR23081:SF1	KOG0323	3.1.3.16	K18998		AT5G01270.2	ATCPL2,CPL2	carboxyl-terminal domain (ctd) phosphatase-like 2
Glyma.07G148100	PF03031,PF00035	PTHR23081,PTHR23081:SF1	KOG0323	3.1.3.16			AT5G01270.2	ATCPL2,CPL2	carboxyl-terminal domain (ctd) phosphatase-like 2
Glyma.07G148100	PF03031,PF00035	PTHR23081,PTHR23081:SF1	KOG0323	3.1.3.16			AT5G01270.2	ATCPL2,CPL2	carboxyl-terminal domain (ctd) phosphatase-like 2
Glyma.07G148100	PF03031,PF00035	PTHR23081,PTHR23081:SF1	KOG0323	3.1.3.16			AT5G01270.2	ATCPL2,CPL2	carboxyl-terminal domain (ctd) phosphatase-like 2
Glyma.07G148100	PF03031,PF00035	PTHR23081,PTHR23081:SF1	KOG0323	3.1.3.16			AT5G01270.1	ATCPL2,CPL2	carboxyl-terminal domain (ctd) phosphatase-like 2
Glyma.07G148100	PF03031,PF00035	PTHR23081,PTHR23081:SF1	KOG0323	3.1.3.16			AT5G01270.2	ATCPL2,CPL2	carboxyl-terminal domain (ctd) phosphatase-like 2
Glyma.07G148100	PF03031,PF00035	PTHR23081,PTHR23081:SF1	KOG0323	3.1.3.16			AT5G01270.2	ATCPL2,CPL2	carboxyl-terminal domain (ctd) phosphatase-like 2
Glyma.07G148100	PF03031,PF00035	PTHR23081,PTHR23081:SF1	KOG0323	3.1.3.16			AT5G01270.1	ATCPL2,CPL2	carboxyl-terminal domain (ctd) phosphatase-like 2
Glyma.07G148100	PF03031,PF00035	PTHR23081,PTHR23081:SF1	KOG0323	3.1.3.16			AT5G01270.2	ATCPL2,CPL2	carboxyl-terminal domain (ctd) phosphatase-like 2
Glyma.07G148100	PF03031,PF00035	PTHR23081,PTHR23081:SF1	KOG0323	3.1.3.16			AT5G01270.1	ATCPL2,CPL2	carboxyl-terminal domain (ctd) phosphatase-like 2
Glyma.07G148100	PF03031,PF00035	PTHR23081,PTHR23081:SF1	KOG0323	3.1.3.16	K18998		AT5G01270.2	ATCPL2,CPL2	carboxyl-terminal domain (ctd) phosphatase-like 2
Glyma.07G148100	PF03031,PF00035	PTHR23081,PTHR23081:SF1	KOG0323	3.1.3.16	K18998		AT5G01270.2	ATCPL2,CPL2	carboxyl-terminal domain (ctd) phosphatase-like 2
Glyma.07G148100	PF04937	PTHR32166,PTHR32166:SF33					AT3G17450.1		hAT dimerisation domain-containing protein
Glyma.07G148200	PF00646	PTHR32133,PTHR32133:SF89				GO:0005515	AT3G23880.1		F-box and associated interaction domains-containing protein
Glyma.07G148300	PF01789	PTHR31407,PTHR31407:SF14				GO:0019898,GO:0015979,GO:0009654,GO:0009523,GO:0005509	AT3G56650.1		Mog1/PsbP/DUF1795-like photosystem II reaction center PsbP family protein
Glyma.07G148400	PF07714	PTHR27006,PTHR27006:SF33	KOG1187	2.7.11.1		GO:0006468,GO:0004672	AT3G09010.1		Protein kinase superfamily protein
Glyma.07G148500	PF07714	PTHR27006,PTHR27006:SF33	KOG1187	2.7.11.1		GO:0006468,GO:0004672	AT3G09010.1		Protein kinase superfamily protein
Glyma.07G148500		PTHR31949,PTHR31949:SF1					AT2G40070.1
Glyma.07G148600		PTHR31949,PTHR31949:SF1					AT2G40070.1
Glyma.07G148600	PF03226	PTHR13848,PTHR13848:SF5	KOG3399				AT2G40110.1		Yippee family putative zinc-binding protein
Glyma.07G148700	PF03226	PTHR13848,PTHR13848:SF5	KOG3399				AT2G40110.1		Yippee family putative zinc-binding protein
Glyma.07G148700	PF00717	PTHR12383,PTHR12383:SF3	KOG1568	3.4.21.89	K09648	GO:0016020,GO:0008236,GO:0006508	AT3G08980.1		Peptidase S24/S26A/S26B/S26C family protein
Glyma.07G148800	PF13920	PTHR15315,PTHR15315:SF31	KOG1039				AT5G01520.1		RING/U-box superfamily protein
Glyma.07G148900	PF00181,PF04884	PTHR12770,PTHR12770:SF24				GO:0006412,GO:0005840,GO:0005622,GO:0003735	AT5G01510.1	RUS5	Protein of unknown function, DUF647
Glyma.07G149000
Glyma.07G149100	PF00118	PTHR11353		3.6.4.9	K09496	GO:0005524	AT3G18190.1		TCP-1/cpn60 chaperonin family protein
Glyma.07G149200	PF04884	PTHR12770,PTHR12770:SF24	KOG4249				AT5G01510.1	RUS5	Protein of unknown function, DUF647
Glyma.07G149300	PF00107,PF08240	PTHR11695,PTHR11695:SF395		1.1.1.1	K00001	GO:0055114,GO:0016491,GO:0008270	AT1G32780.1		GroES-like zinc-binding dehydrogenase family protein
Glyma.07G149400	PF00153	PTHR24089,PTHR24089:SF190	KOG0752		K14684		AT5G01500.1	TAAC	thylakoid ATP/ADP carrier
Glyma.07G149500	PF01699	PTHR31503,PTHR31503:SF1	KOG1397		K07300	GO:0055085,GO:0016021	AT3G51860.1	ATCAX3,ATHCX1,CAX1-LIKE,CAX3	cation exchanger 3
Glyma.07G149600	PF01699	PTHR31503,PTHR31503:SF1	KOG1397		K07300	GO:0055085,GO:0016021	AT3G51860.1	ATCAX3,ATHCX1,CAX1-LIKE,CAX3	cation exchanger 3
Glyma.07G149600	PF01699	PTHR31503,PTHR31503:SF1	KOG1397		K07300	GO:0055085,GO:0016021	AT3G51860.1	ATCAX3,ATHCX1,CAX1-LIKE,CAX3	cation exchanger 3
Glyma.07G149600	PF01699	PTHR31503,PTHR31503:SF1	KOG1397		K07300	GO:0055085,GO:0016021	AT3G51860.1	ATCAX3,ATHCX1,CAX1-LIKE,CAX3	cation exchanger 3
Glyma.07G149600	PF01699	PTHR31503,PTHR31503:SF1				GO:0055085,GO:0016021	AT3G51860.1	ATCAX3,ATHCX1,CAX1-LIKE,CAX3	cation exchanger 3
Glyma.07G149600	PF01699	PTHR31503,PTHR31503:SF1	KOG1397			GO:0055085,GO:0016021	AT3G51860.1	ATCAX3,ATHCX1,CAX1-LIKE,CAX3	cation exchanger 3
Glyma.07G149600
Glyma.07G149700
Glyma.07G149800	PF04791	PTHR31652			K14617		AT5G01460.1		LMBR1-like membrane protein
Glyma.07G149900	PF00657	PTHR14209,PTHR14209:SF10	KOG3035			GO:0016788	AT3G11210.1		SGNH hydrolase-type esterase superfamily protein
Glyma.07G150000	PF12333	PTHR16056,PTHR16056:SF2	KOG2149		K14827		AT5G06350.1		ARM repeat superfamily protein
Glyma.07G150100	PF12333	PTHR16056,PTHR16056:SF2	KOG2149		K14827		AT5G06350.1		ARM repeat superfamily protein
Glyma.07G150100	PF12333	PTHR16056,PTHR16056:SF2	KOG2149		K14827		AT5G06350.1		ARM repeat superfamily protein
Glyma.07G150100	PF00657	PTHR14209,PTHR14209:SF10	KOG3035			GO:0016788	AT3G11210.1		SGNH hydrolase-type esterase superfamily protein
Glyma.07G150200	PF00657	PTHR14209,PTHR14209:SF10	KOG3035			GO:0016788	AT3G11210.1		SGNH hydrolase-type esterase superfamily protein
Glyma.07G150300	PF00657	PTHR14209,PTHR14209:SF10	KOG3035	3.1.1.2		GO:0016788	AT3G11210.1		SGNH hydrolase-type esterase superfamily protein
Glyma.07G150300	PF00657	PTHR14209,PTHR14209:SF10	KOG3035			GO:0016788	AT3G11210.1		SGNH hydrolase-type esterase superfamily protein
Glyma.07G150400	PF13920,PF16040,PF16041	PTHR12183,PTHR12183:SF16	KOG4172	6.3.2.19			AT2G38185.1		RING/U-box superfamily protein
Glyma.07G150500	PF13920,PF16040,PF16041	PTHR12183,PTHR12183:SF16	KOG4172	6.3.2.19			AT2G38185.1		RING/U-box superfamily protein
Glyma.07G150500	PF04937	PTHR32166,PTHR32166:SF31					AT1G79740.1		hAT transposon superfamily
Glyma.07G150600	PF00226,PF01556	PTHR24078,PTHR24078:SF298	KOG0714		K09510		AT5G01390.1		DNAJ heat shock family protein
Glyma.07G150700	PF01556	PTHR24078,PTHR24078:SF298	KOG0714				AT5G01390.1		DNAJ heat shock family protein
Glyma.07G150700	PF00628,PF12165	PTHR12321,PTHR12321:SF46	KOG1632			GO:0005515,GO:0042393,GO:0006355	AT5G05610.2	AL1	alfin-like 1
Glyma.07G150800	PF03171,PF14226	PTHR10209,PTHR10209:SF134	KOG0143	1.14.11.23		GO:0055114,GO:0016491	AT5G05600.1		2-oxoglutarate (2OG) and Fe(II)-dependent oxygenase superfamily protein
Glyma.07G150900	PF07714,PF13499	PTHR24349,PTHR24349:SF145	KOG0032	2.7.11.1	K13412	GO:0006468,GO:0004672	AT3G51850.1	CPK13	calcium-dependent protein kinase 13
Glyma.07G151000	PF13837	PTHR10032,PTHR10032:SF215				GO:0006351,GO:0005634,GO:0003700	AT2G38250.1		Homeodomain-like superfamily protein
Glyma.07G151100	PF14383	PTHR35499,PTHR35499:SF2					AT5G01370.1	ACI1	ALC-interacting protein 1
Glyma.07G151200	PF00487,PF11960	PTHR32100,PTHR32100:SF17		1.14.99.33	K10257	GO:0006629,GO:0055114,GO:0016717	AT5G05580.1	FAD8	fatty acid desaturase 8
Glyma.07G151300	PF00957	PTHR10241,PTHR10241:SF25	KOG1983		K08518	GO:0016192,GO:0016021	AT5G05570.2		transducin family protein / WD-40 repeat family protein
Glyma.07G151400	PF02770,PF00441,PF02771	PTHR10909,PTHR10909:SF331		1.3.3.6	K00232	GO:0055114,GO:0003995,GO:0016627,GO:0050660,GO:0008152	AT3G51840.1	ACX4,ATG6,ATSCX	acyl-CoA oxidase 4
Glyma.07G151500	PF00441,PF02771	PTHR10909,PTHR10909:SF331	KOG0138	1.3.3.6		GO:0055114,GO:0016627,GO:0050660,GO:0008152	AT3G51840.1	ACX4,ATG6,ATSCX	acyl-CoA oxidase 4
Glyma.07G151500	PF02770,PF02771	PTHR10909,PTHR10909:SF331		1.3.3.6		GO:0055114,GO:0003995,GO:0050660,GO:0016627,GO:0008152	AT3G51840.1	ACX4,ATG6,ATSCX	acyl-CoA oxidase 4
Glyma.07G151500	PF14144	PTHR22952,PTHR22952:SF145				GO:0043565,GO:0006351	AT1G09950.1	RAS1	RESPONSE TO ABA AND SALT 1
Glyma.07G151600		PTHR34996,PTHR34996:SF3
Glyma.16G114400	PF08646	PTHR23273,PTHR23273:SF8					AT5G61000.1	ATRPA70D,RPA70D	Replication factor-A protein 1-related
Glyma.16G114500	PF14214,PF05970	PTHR10492	KOG0987	3.6.4.12		GO:0006281,GO:0003678,GO:0000723	AT5G28780.1		PIF1 helicase
Glyma.16G114600	PF00149	PTHR11668,PTHR11668:SF241	KOG0376	3.1.3.16	K04460	GO:0016787	AT5G63870.2	ATPP7,PP7	serine/threonine phosphatase 7
Glyma.16G114700	PF00149	PTHR11668,PTHR11668:SF241	KOG0372	3.1.3.16		GO:0016787	AT5G63870.2	ATPP7,PP7	serine/threonine phosphatase 7
Glyma.16G114700	PF00149	PTHR11668,PTHR11668:SF241	KOG0372	3.1.3.16		GO:0016787	AT5G63870.1	ATPP7,PP7	serine/threonine phosphatase 7
Glyma.16G114700	PF00149	PTHR11668,PTHR11668:SF241	KOG0372	3.1.3.16		GO:0016787	AT5G63870.1	ATPP7,PP7	serine/threonine phosphatase 7
Glyma.16G114700	PF00011,PF01388	PTHR15348,PTHR15348:SF0				GO:0003677	AT2G17410.1		ARID/BRIGHT DNA-binding domain-containing protein
Glyma.16G114800	PF00011,PF01388	PTHR15348,PTHR15348:SF0				GO:0003677	AT2G17410.2		ARID/BRIGHT DNA-binding domain-containing protein
Glyma.16G114800	PF00011,PF01388	PTHR15348,PTHR15348:SF0				GO:0003677	AT2G17410.2		ARID/BRIGHT DNA-binding domain-containing protein
Glyma.16G114800	PF00011,PF01388	PTHR15348,PTHR15348:SF0				GO:0003677	AT2G17410.1		ARID/BRIGHT DNA-binding domain-containing protein
Glyma.16G114800	PF00011,PF01388	PTHR15348,PTHR15348:SF0				GO:0003677	AT2G17410.1		ARID/BRIGHT DNA-binding domain-containing protein
Glyma.16G114800	PF00011,PF01388	PTHR15348,PTHR15348:SF0				GO:0003677	AT2G17410.2		ARID/BRIGHT DNA-binding domain-containing protein
Glyma.16G114800	PF00011,PF01388	PTHR15348,PTHR15348:SF0				GO:0003677	AT2G17410.1		ARID/BRIGHT DNA-binding domain-containing protein
Glyma.16G114800	PF00011,PF01388	PTHR15348,PTHR15348:SF0				GO:0003677	AT2G17410.2		ARID/BRIGHT DNA-binding domain-containing protein
Glyma.16G114800	PF03547	PTHR31651,PTHR31651:SF6	KOG2722			GO:0055085,GO:0016021	AT1G76520.1		Auxin efflux carrier family protein
Glyma.16G114900	PF03547	PTHR31651,PTHR31651:SF6				GO:0055085,GO:0016021	AT1G20925.1		Auxin efflux carrier family protein
Glyma.16G115000	PF00312	PTHR11885			K02953	GO:0006412,GO:0005840,GO:0005622,GO:0003735	AT3G60770.1		Ribosomal protein S13/S15
Glyma.16G115100	PF00430	PTHR34264				GO:0045263,GO:0015986,GO:0015078	ATCG00130.1		ATPase, F0 complex, subunit B/B\', bacterial/chloroplast
Glyma.16G115200	PF00306,PF00006	PTHR15184,PTHR15184:SF42	KOG1353	3.6.3.14		GO:0033178,GO:0016820,GO:0015991,GO:0005524	ATCG00120.1		ATP synthase subunit alpha
Glyma.16G115300
Glyma.16G115400	PF03547	PTHR31651,PTHR31651:SF5	KOG2722			GO:0055085,GO:0016021	AT1G76520.1		Auxin efflux carrier family protein
Glyma.16G115500	PF03547	PTHR31651,PTHR31651:SF5	KOG2722			GO:0055085,GO:0016021	AT1G76520.2		Auxin efflux carrier family protein
Glyma.16G115500	PF03547	PTHR31651,PTHR31651:SF5	KOG2722			GO:0055085,GO:0016021	AT1G76520.2		Auxin efflux carrier family protein
Glyma.16G115500	PF03547	PTHR31651,PTHR31651:SF5	KOG2722			GO:0055085,GO:0016021	AT1G76520.2		Auxin efflux carrier family protein
Glyma.16G115500	PF13041,PF01535	PTHR24015,PTHR24015:SF469					AT1G13410.1		Tetratricopeptide repeat (TPR)-like superfamily protein
Glyma.16G115600	PF03982	PTHR12317,PTHR12317:SF32	KOG0831	2.3.1.20	K14457	GO:0016747	AT3G51520.1		diacylglycerol acyltransferase family
Glyma.16G115700	PF03982	PTHR12317,PTHR12317:SF32	KOG0831	2.3.1.20	K14457	GO:0016747	AT3G51520.1		diacylglycerol acyltransferase family
Glyma.16G115700	PF03982	PTHR12317,PTHR12317:SF32		2.3.1.20		GO:0016747	AT3G51520.1		diacylglycerol acyltransferase family
Glyma.16G115700	PF03982	PTHR12317,PTHR12317:SF32		2.3.1.20		GO:0016747	AT3G51520.1		diacylglycerol acyltransferase family
Glyma.16G115700	PF03982	PTHR12317,PTHR12317:SF32		2.3.1.20		GO:0016747	AT3G51520.1		diacylglycerol acyltransferase family
Glyma.16G115700	PF03982	PTHR12317,PTHR12317:SF32		2.3.1.20		GO:0016747	AT3G51520.1		diacylglycerol acyltransferase family
Glyma.16G115700	PF03982	PTHR12317,PTHR12317:SF32	KOG0831	2.3.1.20	K14457	GO:0016747	AT3G51520.1		diacylglycerol acyltransferase family
Glyma.16G115800	PF03982	PTHR12317,PTHR12317:SF32	KOG0831	2.3.1.20	K14457	GO:0016747	AT3G51520.1		diacylglycerol acyltransferase family
Glyma.16G115800	PF03982	PTHR12317,PTHR12317:SF32	KOG0831	2.3.1.20		GO:0016747	AT3G51520.1		diacylglycerol acyltransferase family
Glyma.16G115800	PF03982	PTHR12317,PTHR12317:SF32	KOG0831	2.3.1.20		GO:0016747	AT3G51520.1		diacylglycerol acyltransferase family
Glyma.16G115800
Glyma.16G115900	PF02225,PF05922,PF00082	PTHR10795,PTHR10795:SF382		3.4.14.10		GO:0006508,GO:0004252	AT1G32940.1	ATSBT3.5,SBT3.5	Subtilase family protein
Glyma.16G116000	PF02225,PF00082	PTHR10795,PTHR10795:SF382		3.4.14.10		GO:0006508,GO:0004252	AT3G14240.1		Subtilase family protein
Glyma.16G116000	PF14309	PTHR40836,PTHR40836:SF1					AT2G17550.1
Glyma.16G116100	PF14309	PTHR40836,PTHR40836:SF1					AT2G17550.1
Glyma.16G116100		PTHR10241,PTHR10241:SF27	KOG1983				AT4G35560.1		Transducin/WD40 repeat-like superfamily protein
Glyma.16G116200		PTHR10241,PTHR10241:SF27	KOG1983				AT4G35560.1		Transducin/WD40 repeat-like superfamily protein
Glyma.16G116200		PTHR10241,PTHR10241:SF27	KOG1983				AT4G35560.1		Transducin/WD40 repeat-like superfamily protein
Glyma.16G116200	PF00505	PTHR13711,PTHR13711:SF218	KOG0381				AT1G20693.2	HMG BETA 1,HMGB2,NFD02,NFD2	high mobility group B2
Glyma.16G116300	PF00505	PTHR13711,PTHR13711:SF218	KOG0381				AT1G20693.2	HMG BETA 1,HMGB2,NFD02,NFD2	high mobility group B2
Glyma.16G116300	PF00505	PTHR13711,PTHR13711:SF218	KOG0381				AT1G20693.2	HMG BETA 1,HMGB2,NFD02,NFD2	high mobility group B2
Glyma.16G116300	PF00505	PTHR13711,PTHR13711:SF223					AT1G20693.1	HMG BETA 1,HMGB2,NFD02,NFD2	high mobility group B2
Glyma.16G116300	PF08147			3.6.4.13		GO:0016818,GO:0005634,GO:0005524,GO:0003723	AT1G77030.1		hydrolases, acting on acid anhydrides, in phosphorus-containing anhydrides;ATP-dependent helicases;nucleic acid binding;ATP binding;RNA binding;helicases
Glyma.16G116400							AT4G16444.1
Glyma.16G116500	PF14259	PTHR13976	KOG0114		K12898		AT5G66010.1		RNA-binding (RRM/RBD/RNP motifs) family protein
Glyma.16G116600	PF03124	PTHR10783,PTHR10783:SF53				GO:0016021	AT3G23430.1	ATPHO1,PHO1	phosphate 1
Glyma.16G116700		PTHR23132,PTHR23132:SF0				GO:0008716,GO:0005737	AT3G08840.1		D-alanine--D-alanine ligase family
Glyma.16G116800	PF02721,PF08646	PTHR23273,PTHR23273:SF8					AT1G52950.1		Nucleic acid-binding, OB-fold-like protein
Glyma.16G116900	PF05970	PTHR10492				GO:0006281,GO:0003678,GO:0000723	AT5G28780.1		PIF1 helicase
Glyma.16G117000		PTHR27001,PTHR27001:SF2		2.7.11.1,2.7.10.2			AT1G07570.2	APK1,APK1A	Protein kinase superfamily protein
Glyma.16G117100	PF00069	PTHR27001,PTHR27001:SF32	KOG0659,KOG0594,KOG0580	2.7.11.1,2.7.10.2		GO:0006468,GO:0005524,GO:0004672	AT2G17220.1		Protein kinase superfamily protein
Glyma.16G117200	PF05970	PTHR10492				GO:0006281,GO:0003678,GO:0000723	AT3G51690.1		PIF1 helicase
Glyma.16G117300	PF00069	PTHR27001,PTHR27001:SF32	KOG1187	2.7.11.1,2.7.10.2		GO:0006468,GO:0005524,GO:0004672	AT4G35600.2	CONNEXIN 32	Protein kinase superfamily protein
Glyma.16G117400	PF00069,PF07714	PTHR27001,PTHR27001:SF32		2.7.11.1,2.7.10.2		GO:0006468,GO:0005524,GO:0004672	AT1G11300.1		protein serine/threonine kinases;protein kinases;ATP binding;sugar binding;kinases;carbohydrate binding
Glyma.16G117400	PF00069,PF07714	PTHR27001,PTHR27001:SF32		2.7.11.1,2.7.10.2		GO:0006468,GO:0005524,GO:0004672	AT1G11300.1		protein serine/threonine kinases;protein kinases;ATP binding;sugar binding;kinases;carbohydrate binding
Glyma.16G117400	PF07714	PTHR27001	KOG1187	2.7.11.1,2.7.10.2		GO:0006468,GO:0004672	AT1G11300.1		protein serine/threonine kinases;protein kinases;ATP binding;sugar binding;kinases;carbohydrate binding
Glyma.16G117400	PF00069,PF07714	PTHR27001,PTHR27001:SF32	KOG1187	2.7.11.1,2.7.10.2		GO:0006468,GO:0005524,GO:0004672	AT1G11300.1		protein serine/threonine kinases;protein kinases;ATP binding;sugar binding;kinases;carbohydrate binding
Glyma.16G117400	PF00069	PTHR27001,PTHR27001:SF32	KOG1187	2.7.11.1,2.7.10.2		GO:0006468,GO:0005524,GO:0004672	AT4G35600.2	CONNEXIN 32	Protein kinase superfamily protein
Glyma.16G117400	PF00069	PTHR27001,PTHR27001:SF32	KOG1187	2.7.11.1,2.7.10.2		GO:0006468,GO:0005524,GO:0004672	AT4G35600.2	CONNEXIN 32	Protein kinase superfamily protein
Glyma.16G117400	PF07714	PTHR27001,PTHR27001:SF32	KOG1187	2.7.11.1,2.7.10.2		GO:0006468,GO:0004672	AT2G17220.1		Protein kinase superfamily protein
Glyma.16G117500	PF07714	PTHR27001,PTHR27001:SF32		2.7.11.1,2.7.10.2		GO:0006468,GO:0004672	AT4G35600.1	CONNEXIN 32	Protein kinase superfamily protein
Glyma.16G117500	PF07714	PTHR27001,PTHR27001:SF32		2.7.11.1,2.7.10.2		GO:0006468,GO:0004672	AT4G35600.1	CONNEXIN 32	Protein kinase superfamily protein
Glyma.16G117500	PF07714	PTHR27001,PTHR27001:SF32		2.7.11.1,2.7.10.2		GO:0006468,GO:0004672	AT4G35600.1	CONNEXIN 32	Protein kinase superfamily protein
Glyma.16G117500	PF14413,PF04446	PTHR12729,PTHR12729:SF6	KOG2721	2.7.7.79		GO:0008193,GO:0006400,GO:0000287	AT2G32320.1		tRNAHis guanylyltransferase
Glyma.16G117600	PF07714	PTHR27001,PTHR27001:SF32	KOG1187	2.7.11.1,2.7.10.2		GO:0006468,GO:0004672	AT2G17220.1		Protein kinase superfamily protein
Glyma.16G117700	PF01255	PTHR10291		2.5.1.20		GO:0016765	AT2G17570.1		Undecaprenyl pyrophosphate synthetase family protein
Glyma.16G117800
Glyma.16G117900	PF00295	PTHR31375,PTHR31375:SF34		3.2.1.15		GO:0005975,GO:0004650	AT5G14650.1		Pectin lyase-like superfamily protein
Glyma.16G118000	PF01255	PTHR10291	KOG1602	2.5.1.20	K11778	GO:0016765	AT2G17570.1		Undecaprenyl pyrophosphate synthetase family protein
Glyma.16G118100	PF01255	PTHR10291	KOG1602	2.5.1.20	K11778	GO:0016765	AT2G17570.1		Undecaprenyl pyrophosphate synthetase family protein
Glyma.16G118100	PF01255	PTHR10291	KOG1602	2.5.1.20	K11778	GO:0016765	AT2G17570.1		Undecaprenyl pyrophosphate synthetase family protein
Glyma.16G118100	PF01255	PTHR10291	KOG1602	2.5.1.20	K11778	GO:0016765	AT2G17570.1		Undecaprenyl pyrophosphate synthetase family protein
Glyma.16G118100	PF01255	PTHR10291	KOG1602	2.5.1.20	K11778	GO:0016765	AT2G17570.1		Undecaprenyl pyrophosphate synthetase family protein
Glyma.16G118100	PF01255	PTHR10291	KOG1602	2.5.1.20	K11778	GO:0016765	AT2G17570.1		Undecaprenyl pyrophosphate synthetase family protein
Glyma.16G118100	PF01255	PTHR10291	KOG1602	2.5.1.20	K11778	GO:0016765	AT2G17570.1		Undecaprenyl pyrophosphate synthetase family protein
Glyma.16G118100	PF03101
Glyma.16G118200
Glyma.16G118300	PF00627,PF00240	PTHR10677,PTHR10677:SF22	KOG0010		K04523	GO:0005515	AT2G17200.1	DSK2	ubiquitin family protein
Glyma.16G118400	PF00627,PF00240	PTHR10677,PTHR10677:SF22	KOG0010		K04523	GO:0005515	AT2G17200.1	DSK2	ubiquitin family protein
Glyma.16G118400	PF00627,PF00240	PTHR10677,PTHR10677:SF22	KOG0010		K04523	GO:0005515	AT2G17200.1	DSK2	ubiquitin family protein
Glyma.16G118400	PF00627,PF00240	PTHR10677,PTHR10677:SF22	KOG0010		K04523	GO:0005515	AT2G17200.1	DSK2	ubiquitin family protein
Glyma.16G118400	PF00627	PTHR10677,PTHR10677:SF22					AT2G17200.1	DSK2	ubiquitin family protein
Glyma.16G118400	PF00627	PTHR10677,PTHR10677:SF22					AT2G17200.1	DSK2	ubiquitin family protein
Glyma.16G118400	PF00240	PTHR10677,PTHR10677:SF3	KOG0010			GO:0005515	AT2G17200.1	DSK2	ubiquitin family protein
Glyma.16G118400	PF00627,PF00240	PTHR10677,PTHR10677:SF3	KOG0010			GO:0005515	AT2G17200.1	DSK2	ubiquitin family protein
Glyma.16G118400
Glyma.16G118500	PF13676,PF00931	PTHR11017,PTHR11017:SF163				GO:0007165,GO:0005515,GO:0043531	AT5G17680.1		disease resistance protein (TIR-NBS-LRR class), putative
Glyma.16G118600	PF00931	PTHR11017,PTHR11017:SF163				GO:0043531	AT5G17680.1		disease resistance protein (TIR-NBS-LRR class), putative
Glyma.16G118600	PF14223
Glyma.16G118700	PF00132,PF06426	PTHR23416,PTHR23416:SF63	KOG4750	2.3.1.30	K00640	GO:0009001,GO:0006535,GO:0005737	AT4G35640.1	ATSERAT3;2,SERAT3;2	serine acetyltransferase 3;2
Glyma.16G118800	PF00132,PF06426	PTHR23416,PTHR23416:SF63	KOG4750	2.3.1.30		GO:0009001,GO:0006535,GO:0005737	AT4G35640.1	ATSERAT3;2,SERAT3;2	serine acetyltransferase 3;2
Glyma.16G118800	PF00132,PF06426	PTHR23416,PTHR23416:SF63	KOG4750	2.3.1.30		GO:0009001,GO:0006535,GO:0005737	AT4G35640.1	ATSERAT3;2,SERAT3;2	serine acetyltransferase 3;2
Glyma.16G118800	PF00180	PTHR11835,PTHR11835:SF51		1.1.1.41	K00030	GO:0055114,GO:0016616,GO:0051287,GO:0000287	AT4G35260.1	IDH-I,IDH1	isocitrate dehydrogenase 1
Glyma.16G118900	PF03088	PTHR10426,PTHR10426:SF4	KOG1520	4.3.3.2		GO:0016844,GO:0009058	AT3G51430.1	SSL5,YLS2	Calcium-dependent phosphotriesterase superfamily protein
Glyma.16G119000		PTHR10044,PTHR10044:SF103
Glyma.16G119100	PF00187,PF00182	PTHR22595,PTHR22595:SF34	KOG4742	3.2.1.14	K01183	GO:0008061,GO:0016998,GO:0006032,GO:0004568	AT3G12500.1	ATHCHIB,B-CHI,CHI-B,HCHIB,PR-3,PR3	basic chitinase
Glyma.16G119200		PTHR11732,PTHR11732:SF253		1.1.1.317			AT1G60730.2		NAD(P)-linked oxidoreductase superfamily protein
Glyma.16G119300	PF13041	PTHR24015,PTHR24015:SF884					AT1G12700.1		ATP binding;nucleic acid binding;helicases
Glyma.16G119400	PF03087	PTHR33070,PTHR33070:SF18					AT4G35690.1		Arabidopsis protein of unknown function (DUF241)
Glyma.16G119500	PF05699,PF14372	PTHR23272,PTHR23272:SF52	KOG1121			GO:0046983,GO:0003677	AT3G42170.1		BED zinc finger ;hAT family dimerisation domain
Glyma.16G119600	PF00139	PTHR27007,PTHR27007:SF24		2.7.11.1		GO:0030246	AT5G10530.1		Concanavalin A-like lectin protein kinase family protein
Glyma.16G119700	PF00069,PF00139	PTHR27007,PTHR27007:SF24	KOG1187	2.7.11.1		GO:0006468,GO:0005524,GO:0004672,GO:0030246	AT5G10530.1		Concanavalin A-like lectin protein kinase family protein
Glyma.16G119800	PF00383	PTHR11079,PTHR11079:SF90				GO:0008270	AT5G28050.2		Cytidine/deoxycytidylate deaminase family protein
Glyma.16G119900	PF00383	PTHR11079,PTHR11079:SF90				GO:0008270	AT5G28050.2		Cytidine/deoxycytidylate deaminase family protein
Glyma.16G119900	PF03087	PTHR33070,PTHR33070:SF3					AT4G35660.1		Arabidopsis protein of unknown function (DUF241)
Glyma.16G120000
Glyma.16G120100	PF03398	PTHR12161,PTHR12161:SF19					AT4G35730.1		Regulator of Vps4 activity in the MVB pathway protein
Glyma.16G120200	PF00657	PTHR22835,PTHR22835:SF268		3.1.1.3		GO:0016788	AT5G37690.1		SGNH hydrolase-type esterase superfamily protein
Glyma.16G120300
Glyma.16G120400		PTHR22835,PTHR22835:SF163		3.1.1.3			AT1G71691.2		GDSL-like Lipase/Acylhydrolase superfamily protein
Glyma.16G120500		PTHR22835,PTHR22835:SF163		3.1.1.3			AT1G71691.2		GDSL-like Lipase/Acylhydrolase superfamily protein
Glyma.16G120500	PF04124	PTHR21311,PTHR21311:SF0				GO:0017119	AT5G11980.1		conserved oligomeric Golgi complex component-related / COG complex component-related
Glyma.16G120600	PF04124	PTHR21311,PTHR21311:SF0				GO:0017119	AT5G11980.1		conserved oligomeric Golgi complex component-related / COG complex component-related
Glyma.16G120600							AT2G17030.1		F-box family protein with a domain of unknown function (DUF295)
Glyma.16G120700	PF03478	PTHR13710,PTHR13710:SF86					AT1G65740.1		Protein of unknown function (DUF295)
Glyma.16G120800	PF09348	PTHR34202,PTHR34202:SF1					AT2G17695.1
Glyma.16G120900	PF00612	PTHR32295,PTHR32295:SF39				GO:0005515	AT3G51380.1	IQD20	IQ-domain 20
Glyma.16G121000		PTHR36374,PTHR36374:SF1
Glyma.16G121100	PF04484	PTHR31807,PTHR31807:SF8					AT1G49890.1		Family of unknown function (DUF566)
Glyma.16G121200	PF00076	PTHR15241	KOG0114,KOG0107		K12897	GO:0003676	AT4G35785.2		RNA-binding (RRM/RBD/RNP motifs) family protein
Glyma.16G121300	PF00076	PTHR15241			K12897	GO:0003676	AT4G35785.3		RNA-binding (RRM/RBD/RNP motifs) family protein
Glyma.16G121300	PF00076	PTHR15241	KOG0114,KOG0107			GO:0003676	AT4G35785.2		RNA-binding (RRM/RBD/RNP motifs) family protein
Glyma.16G121300	PF00076	PTHR15241				GO:0003676	AT4G35785.3		RNA-binding (RRM/RBD/RNP motifs) family protein
Glyma.16G121300	PF00076	PTHR15241			K12897	GO:0003676	AT4G35785.3		RNA-binding (RRM/RBD/RNP motifs) family protein
Glyma.16G121300	PF00076	PTHR15241	KOG0114,KOG0107		K12897	GO:0003676	AT4G35785.2		RNA-binding (RRM/RBD/RNP motifs) family protein
Glyma.16G121300
Glyma.16G121400
Glyma.16G121400
Glyma.16G121400
Glyma.16G121400
Glyma.16G121400
Glyma.16G121400		PTHR10492
Glyma.16G121500		PTHR10492
Glyma.16G121600	PF03171	PTHR10869,PTHR10869:SF78		1.14.11.2	K00472	GO:0055114,GO:0016491	AT1G20270.1		2-oxoglutarate (2OG) and Fe(II)-dependent oxygenase superfamily protein
Glyma.16G121700	PF03171	PTHR10869,PTHR10869:SF78		1.14.11.2	K00472	GO:0055114,GO:0016491	AT1G20270.1		2-oxoglutarate (2OG) and Fe(II)-dependent oxygenase superfamily protein
Glyma.16G121700
Glyma.16G121800	PF13441						AT2G17730.2	NIP2	NEP-interacting protein 2
Glyma.16G121900	PF13441						AT2G17730.2	NIP2	NEP-interacting protein 2
Glyma.16G121900	PF13441						AT2G17730.2	NIP2	NEP-interacting protein 2
Glyma.16G121900	PF13441						AT2G17730.2	NIP2	NEP-interacting protein 2
Glyma.16G121900	PF14291	PTHR11697,PTHR11697:SF137					AT1G19260.1		TTF-type zinc finger protein with HAT dimerisation domain
Glyma.16G122000	PF07714	PTHR27003,PTHR27003:SF83	KOG1187	2.7.11.1		GO:0006468,GO:0004672	AT5G54380.1	THE1	protein kinase family protein
Glyma.16G122100	PF13672	PTHR13832,PTHR13832:SF237	KOG0700	3.1.3.16		GO:0006470,GO:0004722	AT3G51370.1		Protein phosphatase 2C family protein
Glyma.16G122200	PF02714	PTHR13018,PTHR13018:SF52				GO:0016020	AT4G35870.1		early-responsive to dehydration stress protein (ERD4)
Glyma.16G122300		PTHR33384,PTHR33384:SF5
Glyma.16G122400	PF00026	PTHR13683,PTHR13683:SF232	KOG1339	3.4.23.12		GO:0006508,GO:0004190	AT4G35880.1		Eukaryotic aspartyl protease family protein
Glyma.16G122500	PF00026	PTHR13683,PTHR13683:SF232	KOG1339	3.4.23.12		GO:0006508,GO:0004190	AT4G35880.1		Eukaryotic aspartyl protease family protein
Glyma.16G122500	PF00026	PTHR13683,PTHR13683:SF232	KOG1339	3.4.23.12		GO:0006508,GO:0004190	AT4G35880.1		Eukaryotic aspartyl protease family protein
Glyma.16G122500	PF05970	PTHR10492				GO:0006281,GO:0003678,GO:0000723	AT5G28780.1		PIF1 helicase
Glyma.16G122600	PF00026	PTHR13683,PTHR13683:SF232	KOG1339	3.4.23.12		GO:0006508,GO:0004190	AT2G17760.1		Eukaryotic aspartyl protease family protein
Glyma.16G122700	PF08159	PTHR12202,PTHR12202:SF0	KOG2318			GO:0005634	AT3G01160.1
Glyma.16G122800	PF08159	PTHR12202,PTHR12202:SF0	KOG2318			GO:0005634	AT3G01160.1
Glyma.16G122800	PF08159	PTHR12202,PTHR12202:SF0	KOG2318			GO:0005634	AT3G01160.1
Glyma.16G122800	PF08159	PTHR12202,PTHR12202:SF0	KOG2318			GO:0005634	AT3G01160.1
Glyma.16G122800
Glyma.16G122900		PTHR36081,PTHR36081:SF1					AT5G66090.1
Glyma.16G123000		PTHR36081,PTHR36081:SF1					AT5G66090.1
Glyma.16G123000		PTHR36081,PTHR36081:SF1					AT5G66090.1
Glyma.16G123000	PF05383	PTHR22792,PTHR22792:SF59	KOG2590		K18757		AT4G35890.1		winged-helix DNA-binding transcription factor family protein
Glyma.16G123100
Glyma.16G123200
Glyma.16G123300
Glyma.16G123400	PF10440	PTHR34271				GO:0018024
Glyma.16G123400
Glyma.16G123400	PF10440	PTHR34271				GO:0018024
Glyma.16G123400		PTHR23505,PTHR23505:SF17					AT2G22730.1		Major facilitator superfamily protein
Glyma.16G123500	PF03980	PTHR15459					AT4G19350.1	EMB3006	embryo defective 3006
Glyma.16G123600	PF03980	PTHR15459					AT4G19350.1	EMB3006	embryo defective 3006
Glyma.16G123600	PF03931,PF01466	PTHR11165	KOG1724		K03094	GO:0006511	AT1G75950.1	ASK1,ATSKP1,SKP1,SKP1A,UIP1	S phase kinase-associated protein 1
Glyma.16G123700	PF04749	PTHR31704,PTHR31704:SF3					AT4G35920.3	MCA1	PLAC8 family protein
Glyma.16G123800	PF04749	PTHR31704,PTHR31704:SF3					AT4G35920.2	MCA1	PLAC8 family protein
Glyma.16G123800		PTHR31704,PTHR31704:SF3					AT4G35920.1	MCA1	PLAC8 family protein
Glyma.16G123800	PF04749	PTHR31704,PTHR31704:SF3					AT4G35920.1	MCA1	PLAC8 family protein
Glyma.16G123800	PF04749	PTHR31704,PTHR31704:SF3					AT4G35920.2	MCA1	PLAC8 family protein
Glyma.16G123800	PF04749	PTHR31704,PTHR31704:SF3					AT4G35920.2	MCA1	PLAC8 family protein
Glyma.16G123800	PF04749	PTHR31704,PTHR31704:SF3					AT4G35920.3	MCA1	PLAC8 family protein
Glyma.16G123800	PF04749	PTHR31704,PTHR31704:SF3					AT4G35920.1	MCA1	PLAC8 family protein
Glyma.16G123800	PF04749	PTHR31704,PTHR31704:SF3					AT4G35920.3	MCA1	PLAC8 family protein
Glyma.16G123800		PTHR31704,PTHR31704:SF3					AT4G35920.2	MCA1	PLAC8 family protein
Glyma.16G123800		PTHR31704,PTHR31704:SF3					AT4G35920.1	MCA1	PLAC8 family protein
Glyma.16G123800		PTHR34049,PTHR34049:SF2					AT4G35930.1		F-box family protein
Glyma.16G123900	PF00657	PTHR22835,PTHR22835:SF184		3.1.1.3		GO:0016788	AT1G75900.1		GDSL-like Lipase/Acylhydrolase superfamily protein
Glyma.16G124000	PF02301	PTHR11842,PTHR11842:SF11				GO:0007094	AT3G25980.1	MAD2	DNA-binding HORMA family protein
Glyma.16G124100	PF00657	PTHR22835,PTHR22835:SF184		3.1.1.3		GO:0016788	AT1G75900.1		GDSL-like Lipase/Acylhydrolase superfamily protein
Glyma.16G124200	PF01740	PTHR11814,PTHR11814:SF55				GO:0055085,GO:0016020,GO:0008272,GO:0008271	AT5G13550.1	SULTR4;1	sulfate transporter 4.1
Glyma.16G124300	PF08477	PTHR24072,PTHR24072:SF179	KOG0393		K04392	GO:0007264,GO:0005525	AT4G35950.1	ARAC6,ATRAC6,ATROP5,RAC2,RAC6,ROP5	RAC-like 6
Glyma.16G124400	PF08477	PTHR24072,PTHR24072:SF179	KOG0393		K04392	GO:0007264,GO:0005525	AT4G35950.1	ARAC6,ATRAC6,ATROP5,RAC2,RAC6,ROP5	RAC-like 6
Glyma.16G124400	PF08477	PTHR24072,PTHR24072:SF179	KOG0393		K04392	GO:0007264,GO:0005525	AT4G35950.1	ARAC6,ATRAC6,ATROP5,RAC2,RAC6,ROP5	RAC-like 6
Glyma.16G124400	PF03215	PTHR12172,PTHR12172:SF0	KOG1970		K06662	GO:0007049,GO:0006281,GO:0005634	AT5G66130.1	ATRAD17,RAD17	RADIATION SENSITIVE 17
Glyma.16G124500	PF04783,PF04782	PTHR21450,PTHR21450:SF23					AT3G51290.1		Protein of unknown function (DUF630) ;Protein of unknown function (DUF632)
Glyma.16G124600	PF13414	PTHR36326,PTHR36326:SF1					AT3G51280.1		Tetratricopeptide repeat (TPR)-like superfamily protein
Glyma.16G124700		PTHR21068,PTHR21068:SF3					AT4G35980.1
Glyma.16G124800
Glyma.16G124900	PF06911	PTHR21068,PTHR21068:SF22					AT2G17840.1	ERD7	Senescence/dehydration-associated protein-related
Glyma.16G125000	PF00512,PF02518,PF00072	PTHR24423,PTHR24423:SF436	KOG0519	2.7.13.3		GO:0007165,GO:0000155,GO:0000160	AT2G17820.1	AHK1,ATHK1,HK1	histidine kinase 1
Glyma.16G125100	PF00665,PF08263,PF00560,PF13855	PTHR27004,PTHR27004:SF27	KOG0472	2.7.11.1		GO:0015074,GO:0005515	AT2G34930.1		disease resistance family protein / LRR family protein
Glyma.16G125200	PF08263,PF00560,PF13855	PTHR27004,PTHR27004:SF27	KOG0472	2.7.11.1		GO:0005515	AT2G34930.1		disease resistance family protein / LRR family protein
Glyma.16G125300							AT1G15780.1
Glyma.16G125400		PTHR33137					AT1G15780.1
Glyma.16G125500	PF08263,PF13855	PTHR27004,PTHR27004:SF27	KOG0472	2.7.11.1		GO:0005515	AT2G34930.1		disease resistance family protein / LRR family protein
Glyma.16G125600	PF08370	PTHR19241,PTHR19241:SF273					AT1G15520.1	ABCG40,ATABCG40,ATPDR12,PDR12	pleiotropic drug resistance 12
Glyma.16G125700	PF08263,PF00560,PF13855	PTHR27004,PTHR27004:SF27	KOG0472	2.7.11.1		GO:0005515	AT2G34930.1		disease resistance family protein / LRR family protein
Glyma.16G125800	PF00560	PTHR27004,PTHR27004:SF27		2.7.11.1		GO:0005515	AT2G24130.1		Leucine-rich receptor-like protein kinase family protein
Glyma.16G125900	PF08263,PF00560,PF13855	PTHR27004,PTHR27004:SF27	KOG0472	2.7.11.1		GO:0005515	AT2G34930.1		disease resistance family protein / LRR family protein
Glyma.16G126000	PF08263,PF00560,PF13855	PTHR27004,PTHR27004:SF27	KOG0472	2.7.11.1		GO:0005515	AT2G34930.1		disease resistance family protein / LRR family protein
Glyma.16G126100	PF10584,PF00227	PTHR11599,PTHR11599:SF15	KOG0183	3.4.25.1	K02731	GO:0019773,GO:0006511,GO:0004175,GO:0051603,GO:0005839,GO:0004298	AT5G66140.1	PAD2	proteasome alpha subunit D2
Glyma.16G126200	PF10584,PF00227	PTHR11599,PTHR11599:SF15	KOG0183	3.4.25.1		GO:0019773,GO:0006511,GO:0004175,GO:0051603,GO:0005839,GO:0004298	AT5G66140.1	PAD2	proteasome alpha subunit D2
Glyma.16G126200	PF02809,PF13519	PTHR10223	KOG2884		K03029	GO:0008540,GO:0006511	AT4G38630.1	ATMCB1,MBP1,MCB1,RPN10	regulatory particle non-ATPase 10
Glyma.16G126300	PF02809	PTHR10223	KOG2884		K03029	GO:0008540,GO:0006511	AT4G38630.1	ATMCB1,MBP1,MCB1,RPN10	regulatory particle non-ATPase 10
Glyma.16G126300	PF09261,PF01074,PF07748	PTHR11607,PTHR11607:SF18		3.2.1.24	K01191	GO:0008270,GO:0004553,GO:0005975,GO:0004559,GO:0015923,GO:0006013	AT5G66150.1		Glycosyl hydrolase family 38 protein
Glyma.16G126400	PF00581	PTHR12231,PTHR12231:SF112	KOG1530	2.8.1.1			AT5G66170.3	STR18	sulfurtransferase 18
Glyma.16G126500	PF00581	PTHR12231,PTHR12231:SF112		2.8.1.1			AT5G66170.2	STR18	sulfurtransferase 18
Glyma.16G126500	PF10294	PTHR13539	KOG3201	2.1.1.60			AT4G35987.1		S-adenosyl-L-methionine-dependent methyltransferases superfamily protein
Glyma.16G126600	PF03226	PTHR13848,PTHR13848:SF9					AT4G27745.1		Yippee family putative zinc-binding protein
Glyma.16G126700	PF14111	PTHR31286,PTHR31286:SF1
Glyma.16G126800	PF00314	PTHR31048,PTHR31048:SF11					AT4G38660.1		Pathogenesis-related thaumatin superfamily protein
Glyma.16G126900	PF12776	PTHR31704,PTHR31704:SF9					AT5G05800.2
Glyma.16G127000	PF00314	PTHR31048,PTHR31048:SF3					AT4G36010.1		Pathogenesis-related thaumatin superfamily protein
Glyma.16G127100	PF00313,PF00098	PTHR11544,PTHR11544:SF50			K09250	GO:0006355,GO:0003677,GO:0008270,GO:0003676	AT4G36020.1	CSDP1	cold shock domain protein 1
Glyma.16G127200	PF00175	PTHR19384,PTHR19384:SF82		1.18.1.2,1.6.99.1	K02641	GO:0055114,GO:0016491	AT5G66190.1	ATLFNR1,FNR1	ferredoxin-NADP(+)-oxidoreductase 1
Glyma.16G127300	PF00175	PTHR19384,PTHR19384:SF82		1.18.1.2,1.6.99.1		GO:0055114,GO:0016491	AT5G66190.1	ATLFNR1,FNR1	ferredoxin-NADP(+)-oxidoreductase 1
Glyma.16G127300	PF00514	PTHR23315,PTHR23315:SF123				GO:0005515	AT5G66200.1	ARO2	armadillo repeat only 2
Glyma.16G127400	PF00467,PF01479,PF08071,PF16121,PF00900	PTHR11581	KOG0378		K02987	GO:0003723,GO:0006412,GO:0005840,GO:0005622,GO:0003735	AT5G07090.1		Ribosomal protein S4 (RPS4A) family protein
Glyma.16G127500	PF00226	PTHR24078,PTHR24078:SF190					AT4G36040.1		Chaperone DnaJ-domain superfamily protein
Glyma.16G127600	PF00226	PTHR24078,PTHR24078:SF222					AT4G36040.1		Chaperone DnaJ-domain superfamily protein
Glyma.16G127700		PTHR15749		3.1.4.1			AT1G48360.2		zinc ion binding;nucleic acid binding;hydrolases, acting on acid anhydrides, in phosphorus-containing anhydrides
Glyma.16G127800	PF13676,PF00931	PTHR11017,PTHR11017:SF171	KOG4658			GO:0007165,GO:0005515,GO:0043531	AT5G36930.2		Disease resistance protein (TIR-NBS-LRR class) family
Glyma.16G127900	PF13676,PF00931	PTHR11017,PTHR11017:SF171	KOG4658			GO:0007165,GO:0005515,GO:0043531	AT5G36930.2		Disease resistance protein (TIR-NBS-LRR class) family
Glyma.16G127900	PF13676,PF00931	PTHR11017,PTHR11017:SF171	KOG4658			GO:0007165,GO:0005515,GO:0043531	AT5G36930.2		Disease resistance protein (TIR-NBS-LRR class) family
Glyma.16G127900	PF01582,PF00931	PTHR11017,PTHR11017:SF171				GO:0007165,GO:0005515,GO:0043531	AT5G17680.1		disease resistance protein (TIR-NBS-LRR class), putative
Glyma.16G128000	PF08240	PTHR11695,PTHR11695:SF449	KOG0022	1.1.1.1		GO:0055114,GO:0016491,GO:0008270	AT5G24760.1		GroES-like zinc-binding dehydrogenase family protein
Glyma.16G128100	PF10294	PTHR14614,PTHR14614:SF33	KOG2793				AT1G73320.1		S-adenosyl-L-methionine-dependent methyltransferases superfamily protein
Glyma.16G128200	PF00249	PTHR21677,PTHR21677:SF3	KOG4468				AT2G36960.2	TKI1	TSL-kinase interacting protein 1
Glyma.16G128300	PF00249	PTHR21677,PTHR21677:SF3	KOG4468				AT2G36960.2	TKI1	TSL-kinase interacting protein 1
Glyma.16G128300		PTHR21677,PTHR21677:SF3	KOG4468				AT2G36960.2	TKI1	TSL-kinase interacting protein 1
Glyma.16G128300	PF06839	PTHR22748,PTHR22748:SF4	KOG1294	4.2.99.18		GO:0008270,GO:0006281,GO:0004518	AT4G36050.1		endonuclease/exonuclease/phosphatase family protein
Glyma.16G128400	PF03372	PTHR22748,PTHR22748:SF4		4.2.99.18		GO:0006281,GO:0004518	AT4G36050.2		endonuclease/exonuclease/phosphatase family protein
Glyma.16G128500	PF14531,PF13499	PTHR24349,PTHR24349:SF87	KOG0032	2.7.11.1	K13412		AT5G66210.1	CPK28	calcium-dependent protein kinase 28
Glyma.16G128600	PF14226,PF03171	PTHR10209,PTHR10209:SF137	KOG0143	1.14.11.9	K00475	GO:0055114,GO:0016491	AT3G51240.1	F3\'H,F3H,TT6	flavanone 3-hydroxylase
Glyma.16G128700		PTHR28039,PTHR28039:SF2					AT5G66230.1		Chalcone-flavanone isomerase family protein
Glyma.16G128800		PTHR36347,PTHR36347:SF1					AT2G17972.1
Glyma.16G128900	PF00641	PTHR23111,PTHR23111:SF37	KOG4198			GO:0008270	AT2G17975.1		zinc finger (Ran-binding) family protein
Glyma.16G129000	PF00641	PTHR23111,PTHR23111:SF37				GO:0008270	AT2G17975.1		zinc finger (Ran-binding) family protein
Glyma.16G129000	PF00759	PTHR22298,PTHR22298:SF57		3.2.1.4		GO:0005975,GO:0004553	AT1G19940.1	AtGH9B5,GH9B5	glycosyl hydrolase 9B5
Glyma.16G129100		PTHR31161,PTHR31161:SF6					AT2G17990.1
Glyma.16G129200		PTHR31161,PTHR31161:SF6					AT2G17990.1
Glyma.16G129200		PTHR31161,PTHR31161:SF6					AT2G17990.1
Glyma.16G129200		PTHR31161,PTHR31161:SF6					AT2G17990.1
Glyma.16G129200	PF08263,PF00560,PF13855	PTHR27004,PTHR27004:SF27	KOG0472	2.7.11.1		GO:0005515	AT2G34930.1		disease resistance family protein / LRR family protein
Glyma.16G129300		PTHR12280,PTHR12280:SF31					AT2G17340.1		Uncharacterised conserved protein (UCP030210)
Glyma.16G129400	PF14413,PF04446	PTHR12729,PTHR12729:SF6	KOG2721	2.7.7.79		GO:0008193,GO:0006400,GO:0000287	AT2G32320.1		tRNAHis guanylyltransferase
Glyma.16G129500	PF02519	PTHR31374,PTHR31374:SF35			K14488	GO:0009733	AT4G34760.1		SAUR-like auxin-responsive protein family
Glyma.16G129600	PF00181,PF03947	PTHR13691,PTHR13691:SF16	KOG2309		K02938	GO:0006412,GO:0005840,GO:0005622,GO:0003735	AT4G36130.1		Ribosomal protein L2 family
Glyma.16G129700	PF01625	PTHR10173,PTHR10173:SF28	KOG1635	1.8.4.11	K07304	GO:0055114,GO:0008113,GO:0030091,GO:0016671,GO:0006979	AT2G18030.1		Peptide methionine sulfoxide reductase family protein
Glyma.16G129800	PF00639	PTHR10657,PTHR10657:SF4		5.2.1.8	K09578	GO:0016853	AT2G18040.1	PIN1AT	peptidylprolyl cis/trans isomerase, NIMA-interacting 1
Glyma.16G129900	PF00076	PTHR24012,PTHR24012:SF362	KOG0117			GO:0003676	AT2G44710.1		RNA-binding (RRM/RBD/RNP motifs) family protein
Glyma.16G130000	PF00076	PTHR24012,PTHR24012:SF362	KOG0117			GO:0003676	AT2G44710.1		RNA-binding (RRM/RBD/RNP motifs) family protein
Glyma.16G130000		PTHR21229,PTHR21229:SF15				GO:0016021	AT1G72480.1		Lung seven transmembrane receptor family protein
Glyma.16G130100	PF02365	PTHR31989,PTHR31989:SF23				GO:0006355,GO:0003677	AT2G18060.1	ANAC037,VND1	vascular related NAC-domain protein 1
Glyma.16G130200	PF00137	PTHR10263,PTHR10263:SF13	KOG0232		K02155	GO:0033177,GO:0015991,GO:0015078	AT4G34720.1	ATVHA-C1,AVA-P1,VHA-C1	ATPase, F0/V0 complex, subunit C protein
Glyma.16G130300	PF08263,PF00069,PF13855	PTHR27000,PTHR27000:SF26	KOG1187	2.7.11.1		GO:0006468,GO:0005524,GO:0004672,GO:0005515	AT4G36180.1		Leucine-rich receptor-like protein kinase family protein
Glyma.16G130400	PF11995,PF00225	PTHR24115,PTHR24115:SF450	KOG0242	3.6.4.4	K11498	GO:0008017,GO:0007018,GO:0005524,GO:0003777,GO:0005871	AT3G51150.2		ATP binding microtubule motor family protein
Glyma.16G130500	PF00225,PF11995	PTHR24115,PTHR24115:SF450	KOG0242	3.6.4.4		GO:0008017,GO:0007018,GO:0005524,GO:0003777,GO:0005871	AT3G51150.2		ATP binding microtubule motor family protein
Glyma.16G130500	PF11995,PF00225	PTHR24115,PTHR24115:SF450	KOG0242	3.6.4.4		GO:0008017,GO:0007018,GO:0005524,GO:0003777,GO:0005871	AT3G51150.2		ATP binding microtubule motor family protein
Glyma.16G130500	PF11995,PF00225	PTHR24115,PTHR24115:SF450	KOG0242	3.6.4.4	K11498	GO:0008017,GO:0007018,GO:0005524,GO:0003777,GO:0005871	AT3G51150.2		ATP binding microtubule motor family protein
Glyma.16G130500	PF11995,PF00225	PTHR24115,PTHR24115:SF450	KOG0242	3.6.4.4	K11498	GO:0008017,GO:0007018,GO:0005524,GO:0003777,GO:0005871	AT3G51150.2		ATP binding microtubule motor family protein
Glyma.16G130500	PF11995,PF00225	PTHR24115,PTHR24115:SF450	KOG0242	3.6.4.4	K11498	GO:0008017,GO:0007018,GO:0005524,GO:0003777,GO:0005871	AT3G51150.2		ATP binding microtubule motor family protein
Glyma.16G130500	PF11995,PF00225	PTHR24115,PTHR24115:SF450	KOG0242	3.6.4.4	K11498	GO:0008017,GO:0007018,GO:0005524,GO:0003777,GO:0005871	AT3G51150.2		ATP binding microtubule motor family protein
Glyma.16G130500	PF11995,PF00225	PTHR24115,PTHR24115:SF450	KOG0242	3.6.4.4	K11498	GO:0008017,GO:0007018,GO:0005524,GO:0003777,GO:0005871	AT3G51150.2		ATP binding microtubule motor family protein
Glyma.16G130500	PF11995,PF00225	PTHR24115,PTHR24115:SF450	KOG0242	3.6.4.4	K11498	GO:0008017,GO:0007018,GO:0005524,GO:0003777,GO:0005871	AT3G51150.2		ATP binding microtubule motor family protein
Glyma.16G130500	PF11995,PF00225	PTHR24115,PTHR24115:SF450	KOG0242	3.6.4.4		GO:0008017,GO:0007018,GO:0005524,GO:0003777,GO:0005871	AT3G51150.2		ATP binding microtubule motor family protein
Glyma.16G130500	PF11995,PF00225	PTHR24115,PTHR24115:SF450	KOG0242	3.6.4.4		GO:0008017,GO:0007018,GO:0005524,GO:0003777,GO:0005871	AT3G51150.2		ATP binding microtubule motor family protein
Glyma.16G130500
Glyma.16G130600	PF05577	PTHR11010,PTHR11010:SF42	KOG2182	3.4.21.26		GO:0008236,GO:0006508	AT4G36195.1		Serine carboxypeptidase S28 family protein
Glyma.16G130700	PF05577	PTHR11010,PTHR11010:SF42	KOG2182	3.4.21.26		GO:0008236,GO:0006508	AT4G36195.1		Serine carboxypeptidase S28 family protein
Glyma.16G130700	PF05577	PTHR11010,PTHR11010:SF42	KOG2182	3.4.21.26		GO:0008236,GO:0006508	AT4G36195.3		Serine carboxypeptidase S28 family protein
Glyma.16G130700
Glyma.16G130800	PF05577	PTHR11010,PTHR11010:SF42	KOG2182	3.4.14.2		GO:0008236,GO:0006508	AT4G36195.1		Serine carboxypeptidase S28 family protein
Glyma.16G130900	PF05577	PTHR11010,PTHR11010:SF42	KOG2182	3.4.14.2		GO:0008236,GO:0006508	AT4G36195.1		Serine carboxypeptidase S28 family protein
Glyma.16G130900	PF05277	PTHR17920,PTHR17920:SF7					AT4G36210.3		Protein of unknown function (DUF726)
Glyma.16G131000	PF05277	PTHR17920,PTHR17920:SF7	KOG2385				AT4G36210.1		Protein of unknown function (DUF726)
Glyma.16G131000	PF07798	PTHR14360,PTHR14360:SF1	KOG3156				AT2G16460.1		Protein of unknown function (DUF1640)
Glyma.16G131100	PF07798	PTHR14360,PTHR14360:SF1	KOG3156				AT2G16460.1		Protein of unknown function (DUF1640)
Glyma.16G131100	PF00067	PTHR24298,PTHR24298:SF73	KOG0156		K09755	GO:0055114,GO:0020037,GO:0016705,GO:0005506	AT4G36220.1	CYP84A1,FAH1	ferulic acid 5-hydroxylase 1
Glyma.16G131200
Glyma.16G131300							AT4G32140.1		EamA-like transporter family
Glyma.16G131400	PF08263,PF13855	PTHR27000,PTHR27000:SF159	KOG0472	2.7.11.1		GO:0005515	AT4G08850.1		Leucine-rich repeat receptor-like protein kinase family protein
Glyma.16G131500	PF00498,PF13325	PTHR13233,PTHR13233:SF2	KOG2293		K11674	GO:0005515	AT3G54350.1	emb1967	Forkhead-associated (FHA) domain-containing protein
Glyma.16G131600	PF00171	PTHR11699,PTHR11699:SF117		1.2.1.3	K00128	GO:0055114,GO:0016491,GO:0008152	AT4G36250.1	ALDH3F1	aldehyde dehydrogenase 3F1
Glyma.16G131700	PF02140,PF01301	PTHR23421,PTHR23421:SF79		3.2.1.23		GO:0030246,GO:0005975,GO:0004553	AT4G36360.1	BGAL3	beta-galactosidase 3
Glyma.16G131800	PF13589	PTHR23336,PTHR23336:SF18	KOG1845				AT4G36290.1	CRT1	compromised recognition of TCV 1
Glyma.16G131900	PF10248	PTHR13105,PTHR13105:SF7					AT4G22740.2		glycine-rich protein
Glyma.16G132000	PF05142	PTHR31604,PTHR31604:SF3					AT1G19790.2	SRS7	SHI-related sequence 7
Glyma.16G132100	PF05142	PTHR31604,PTHR31604:SF3					AT1G19790.1	SRS7	SHI-related sequence 7
Glyma.16G132100	PF05142	PTHR31604,PTHR31604:SF3					AT1G19790.1	SRS7	SHI-related sequence 7
Glyma.16G132100	PF05142	PTHR31604,PTHR31604:SF3					AT1G19790.2	SRS7	SHI-related sequence 7
Glyma.16G132100
Glyma.16G132200		PTHR33054
Glyma.16G132300	PF08569	PTHR10182					AT5G18940.1		Mo25 family protein
Glyma.16G132400	PF00561	PTHR10992,PTHR10992:SF804	KOG4178	3.3.2.10			AT3G51000.1		alpha/beta-Hydrolases superfamily protein
Glyma.16G132500	PF00561	PTHR10992,PTHR10992:SF804	KOG4178	3.3.2.10			AT3G51000.1		alpha/beta-Hydrolases superfamily protein
Glyma.16G132500	PF00153	PTHR24089,PTHR24089:SF62	KOG0764		K15115		AT5G66380.1	ATFOLT1,FOLT1	folate transporter 1
Glyma.16G132600	PF00153	PTHR24089,PTHR24089:SF62	KOG0764				AT5G66380.1	ATFOLT1,FOLT1	folate transporter 1
Glyma.16G132600	PF00153	PTHR24089,PTHR24089:SF62	KOG0764				AT5G66380.1	ATFOLT1,FOLT1	folate transporter 1
Glyma.16G132600	PF00153	PTHR24089,PTHR24089:SF62	KOG0764				AT5G66380.1	ATFOLT1,FOLT1	folate transporter 1
Glyma.16G132600	PF00153	PTHR24089,PTHR24089:SF62	KOG0764				AT5G66380.1	ATFOLT1,FOLT1	folate transporter 1
Glyma.16G132600	PF00153	PTHR24089,PTHR24089:SF62	KOG0764				AT5G66380.1	ATFOLT1,FOLT1	folate transporter 1
Glyma.16G132600	PF00153	PTHR24089,PTHR24089:SF62	KOG0764				AT5G66380.1	ATFOLT1,FOLT1	folate transporter 1
Glyma.16G132600	PF00153	PTHR24089,PTHR24089:SF62					AT5G66380.1	ATFOLT1,FOLT1	folate transporter 1
Glyma.16G132600	PF00153	PTHR24089,PTHR24089:SF62					AT5G66380.1	ATFOLT1,FOLT1	folate transporter 1
Glyma.16G132600	PF00153	PTHR24089,PTHR24089:SF62	KOG0756,KOG0758				AT5G66380.1	ATFOLT1,FOLT1	folate transporter 1
Glyma.16G132600	PF00153	PTHR24089,PTHR24089:SF62	KOG0758				AT5G66380.1	ATFOLT1,FOLT1	folate transporter 1
Glyma.16G132600	PF00153	PTHR24089,PTHR24089:SF62	KOG0764		K15115		AT5G66380.1	ATFOLT1,FOLT1	folate transporter 1
Glyma.16G132600	PF00153	PTHR24089,PTHR24089:SF62	KOG0764		K15115		AT5G66380.1	ATFOLT1,FOLT1	folate transporter 1
Glyma.16G132600	PF00153	PTHR24089,PTHR24089:SF62	KOG0756,KOG0758				AT5G66380.1	ATFOLT1,FOLT1	folate transporter 1
Glyma.16G132600	PF00153	PTHR24089,PTHR24089:SF62	KOG0756,KOG0758				AT5G66380.1	ATFOLT1,FOLT1	folate transporter 1
Glyma.16G132600	PF00153	PTHR24089,PTHR24089:SF62	KOG0764		K15115		AT5G66380.1	ATFOLT1,FOLT1	folate transporter 1
Glyma.16G132600	PF00153	PTHR24089,PTHR24089:SF62	KOG0764				AT5G66380.1	ATFOLT1,FOLT1	folate transporter 1
Glyma.16G132600	PF00542	PTHR24089,PTHR24089:SF272			K02935	GO:0006412,GO:0003735	AT4G36420.1		Ribosomal protein L12 family protein
Glyma.16G132700	PF16320,PF00542	PTHR24089,PTHR24089:SF321			K02935	GO:0006412,GO:0003735	AT4G36420.1		Ribosomal protein L12 family protein
Glyma.16G132700	PF00141	PTHR31388,PTHR31388:SF3		1.11.1.7	K00430	GO:0055114,GO:0020037,GO:0006979,GO:0004601	AT5G66390.1		Peroxidase superfamily protein
Glyma.16G132800	PF13456	PTHR33033,PTHR33033:SF17					AT5G42905.1		Polynucleotidyl transferase, ribonuclease H-like superfamily protein
Glyma.16G132900	PF00141	PTHR31388,PTHR31388:SF3		1.11.1.7	K00430	GO:0055114,GO:0020037,GO:0006979,GO:0004601	AT5G66390.1		Peroxidase superfamily protein
Glyma.16G133000		PTHR35752					AT4G36440.1
Glyma.16G133100		PTHR35752					AT4G36440.1
Glyma.16G133100		PTHR16223,PTHR16223:SF11					AT1G27660.1		basic helix-loop-helix (bHLH) DNA-binding superfamily protein
Glyma.16G133200	PF03765,PF00650	PTHR23324,PTHR23324:SF71	KOG1471				AT4G36490.1	ATSFH12,SFH12	SEC14-like 12
Glyma.16G133300	PF03470,PF03468,PF03469	PTHR21596,PTHR21596:SF25				GO:0031047	AT3G48670.1	IDN2,RDM12	XH/XS domain-containing protein
Glyma.16G133400	PF03470,PF03468	PTHR21596,PTHR21596:SF25				GO:0031047	AT3G48670.1	IDN2,RDM12	XH/XS domain-containing protein
Glyma.16G133400	PF00004,PF14363	PTHR23070,PTHR23070:SF35			K08900	GO:0005524	AT5G17760.1		P-loop containing nucleoside triphosphate hydrolases superfamily protein
Glyma.16G133500	PF00004,PF14363	PTHR23070,PTHR23070:SF24				GO:0005524	AT3G50930.1	BCS1	cytochrome BC1 synthesis
Glyma.16G133600		PTHR11410,PTHR11410:SF0			K02126	GO:0015986,GO:0015078	ATMG01170.1		ATPase, F0 complex, subunit A protein
Glyma.16G133700	PF00067	PTHR24286,PTHR24286:SF85	KOG0157	1.14.13.109		GO:0055114,GO:0020037,GO:0016705,GO:0005506	AT1G19630.1	CYP722A1	cytochrome P450, family 722, subfamily A, polypeptide 1
Glyma.16G133800	PF06792,PF09370	PTHR31862					AT5G66420.2
Glyma.16G133900	PF03492	PTHR31009,PTHR31009:SF6		2.1.1.274		GO:0008168	AT3G11480.1	ATBSMT1,BSMT1	S-adenosyl-L-methionine-dependent methyltransferases superfamily protein
Glyma.16G134000	PF03492	PTHR31009,PTHR31009:SF6		2.1.1.274		GO:0008168	AT5G04380.1		S-adenosyl-L-methionine-dependent methyltransferases superfamily protein
Glyma.16G134100							AT2G23460.1	ATXLG1,XLG1	extra-large G-protein 1
Glyma.16G134200		PTHR22746					AT5G28350.1		Quinoprotein amine dehydrogenase, beta chain-like; RIC1-like guanyl-nucleotide exchange factor
Glyma.16G134300	PF03492	PTHR31009,PTHR31009:SF6		2.1.1.274,2.1.1.273	K08241	GO:0008168	AT3G11480.1	ATBSMT1,BSMT1	S-adenosyl-L-methionine-dependent methyltransferases superfamily protein
Glyma.16G134400	PF03492	PTHR31009,PTHR31009:SF6		2.1.1.274	K08241	GO:0008168	AT3G11480.1	ATBSMT1,BSMT1	S-adenosyl-L-methionine-dependent methyltransferases superfamily protein
Glyma.16G134500	PF03492	PTHR31009,PTHR31009:SF6		2.1.1.274,2.1.1.273	K08241	GO:0008168	AT3G11480.1	ATBSMT1,BSMT1	S-adenosyl-L-methionine-dependent methyltransferases superfamily protein
Glyma.16G134600	PF03492	PTHR31009,PTHR31009:SF6		2.1.1.274,2.1.1.273	K08241	GO:0008168	AT4G36470.1		S-adenosyl-L-methionine-dependent methyltransferases superfamily protein
Glyma.16G134700		PTHR33640,PTHR33640:SF1					AT5G66440.1
Glyma.16G134800	PF07650,PF01926	PTHR11649,PTHR11649:SF3	KOG1423		K03595	GO:0003723,GO:0005525	AT5G66470.1		RNA binding;GTP binding
Glyma.16G134900	PF07650,PF01926	PTHR11649,PTHR11649:SF3	KOG1423		K03595	GO:0003723,GO:0005525	AT5G66470.1		RNA binding;GTP binding
Glyma.16G134900	PF01926	PTHR11649,PTHR11649:SF3	KOG1423			GO:0005525	AT5G66470.1		RNA binding;GTP binding
Glyma.16G134900		PTHR35490,PTHR35490:SF1					AT3G50910.1
Glyma.16G135000		PTHR35490,PTHR35490:SF1					AT3G50910.1
Glyma.16G135000		PTHR35490,PTHR35490:SF1					AT3G50910.1
Glyma.16G135000		PTHR35490,PTHR35490:SF1					AT3G50910.1
Glyma.16G135000		PTHR35490,PTHR35490:SF1					AT3G50910.1
Glyma.16G135000		PTHR35490,PTHR35490:SF1					AT3G50910.1
Glyma.16G135000		PTHR35291					AT2G18210.1
Glyma.16G135100	PF13676,PF00931	PTHR11017,PTHR11017:SF171				GO:0007165,GO:0005515,GO:0043531	AT5G17680.1		disease resistance protein (TIR-NBS-LRR class), putative
Glyma.16G135200	PF14227	PTHR11439,PTHR11439:SF175					AT5G48050.1
Glyma.16G135300		PTHR35291					AT3G50900.1
Glyma.16G135400	PF13676,PF00931	PTHR11017,PTHR11017:SF171				GO:0007165,GO:0005515,GO:0043531	AT5G17680.1		disease resistance protein (TIR-NBS-LRR class), putative
Glyma.16G135500	PF13676,PF00931	PTHR11017,PTHR11017:SF171				GO:0007165,GO:0005515,GO:0043531	AT5G36930.1		Disease resistance protein (TIR-NBS-LRR class) family
Glyma.16G135500		PTHR35291					AT2G18210.1
Glyma.16G135600
Glyma.16G135700		PTHR23359,PTHR23359:SF94		2.7.4.3		GO:0019205,GO:0006139,GO:0005524	AT2G37250.1	ADK,ATPADK1	adenosine kinase
Glyma.16G135800	PF00931,PF01582	PTHR11017,PTHR11017:SF171				GO:0043531,GO:0007165,GO:0005515	AT5G17680.1		disease resistance protein (TIR-NBS-LRR class), putative
Glyma.16G135900	PF13676,PF00931	PTHR11017,PTHR11017:SF171	KOG1947			GO:0007165,GO:0005515,GO:0043531	AT5G17680.1		disease resistance protein (TIR-NBS-LRR class), putative
Glyma.16G136000							AT1G43722.1
Glyma.16G136100	PF13676,PF00931	PTHR11017,PTHR11017:SF171				GO:0007165,GO:0005515,GO:0043531	AT5G17680.1		disease resistance protein (TIR-NBS-LRR class), putative
Glyma.16G136200		PTHR35291					AT4G36500.1
Glyma.16G136300	PF04547	PTHR12308					AT1G73020.1
Glyma.16G136400	PF04547	PTHR12308					AT1G73020.2
Glyma.16G136400	PF04547	PTHR12308					AT1G73020.2
Glyma.16G136400	PF04547	PTHR12308					AT1G73020.1
Glyma.16G136400	PF04547	PTHR12308					AT1G73020.1
Glyma.16G136400	PF04547	PTHR12308					AT1G73020.2
Glyma.16G136400	PF04547	PTHR12308					AT1G73020.2
Glyma.16G136400	PF04547	PTHR12308					AT1G73020.1
Glyma.16G136400				3.2.1.58
Glyma.16G136500	PF13676,PF00931	PTHR11017,PTHR11017:SF171	KOG4658			GO:0007165,GO:0005515,GO:0043531	AT5G17680.1		disease resistance protein (TIR-NBS-LRR class), putative
Glyma.16G136600	PF13676,PF00931	PTHR11017,PTHR11017:SF171	KOG4658			GO:0007165,GO:0005515,GO:0043531	AT5G17680.1		disease resistance protein (TIR-NBS-LRR class), putative
Glyma.16G136600	PF13676,PF00931	PTHR11017,PTHR11017:SF171	KOG4658			GO:0007165,GO:0005515,GO:0043531	AT5G17680.1		disease resistance protein (TIR-NBS-LRR class), putative
Glyma.16G136600	PF14214,PF05970	PTHR10492,PTHR10492:SF26	KOG0987	3.6.4.12		GO:0006281,GO:0003678,GO:0000723	AT3G51690.1		PIF1 helicase
Glyma.16G136700
Glyma.16G136800	PF13676,PF00931	PTHR11017,PTHR11017:SF171				GO:0007165,GO:0005515,GO:0043531	AT5G36930.1		Disease resistance protein (TIR-NBS-LRR class) family
Glyma.16G136900	PF00931	PTHR11017,PTHR11017:SF171				GO:0043531	AT1G27170.1		transmembrane receptors;ATP binding
Glyma.16G136900		PTHR11017,PTHR11017:SF171					AT5G36930.1		Disease resistance protein (TIR-NBS-LRR class) family
Glyma.16G137000
Glyma.16G137100	PF13676,PF00931	PTHR11017,PTHR11017:SF171				GO:0007165,GO:0005515,GO:0043531	AT5G17680.1		disease resistance protein (TIR-NBS-LRR class), putative
Glyma.16G137200	PF05729,PF13676	PTHR11017,PTHR11017:SF171	KOG0472			GO:0007165,GO:0005515	AT5G17680.1		disease resistance protein (TIR-NBS-LRR class), putative
Glyma.16G137300	PF05729,PF13676	PTHR11017,PTHR11017:SF171				GO:0007165,GO:0005515	AT5G17680.1		disease resistance protein (TIR-NBS-LRR class), putative
Glyma.16G137300
Glyma.16G137400		PTHR23172,PTHR23172:SF19					AT4G36520.1		Chaperone DnaJ-domain superfamily protein
Glyma.16G137500		PTHR23172,PTHR23172:SF19					AT4G36520.1		Chaperone DnaJ-domain superfamily protein
Glyma.16G137500	PF13676,PF00931	PTHR11017,PTHR11017:SF171				GO:0007165,GO:0005515,GO:0043531	AT5G17680.1		disease resistance protein (TIR-NBS-LRR class), putative
Glyma.16G137600		PTHR35291					AT2G18210.1
Glyma.16G137700		PTHR23172,PTHR23172:SF19					AT4G36520.1		Chaperone DnaJ-domain superfamily protein
Glyma.16G137800
Glyma.16G137900	PF12697	PTHR10992,PTHR10992:SF701	KOG1454				AT4G36530.2		alpha/beta-Hydrolases superfamily protein
Glyma.16G138000	PF12697	PTHR10992,PTHR10992:SF701	KOG1454				AT4G36530.2		alpha/beta-Hydrolases superfamily protein
Glyma.16G138000	PF12697	PTHR10992,PTHR10992:SF701	KOG1454				AT4G36530.2		alpha/beta-Hydrolases superfamily protein
Glyma.16G138000	PF00646,PF01167	PTHR16517,PTHR16517:SF40	KOG2502			GO:0005515	AT2G18280.2	AtTLP2,TLP2	tubby like protein 2
Glyma.16G138100	PF03256	PTHR12936	KOG3437		K03357		AT2G18290.1	APC10	anaphase promoting complex 10
Glyma.16G138200	PF03256	PTHR12936					AT2G18290.1	APC10	anaphase promoting complex 10
Glyma.16G138200	PF03256	PTHR12936	KOG3437		K03357		AT2G18290.1	APC10	anaphase promoting complex 10
Glyma.16G138200	PF03256	PTHR12936	KOG3437				AT2G18290.1	APC10	anaphase promoting complex 10
Glyma.16G138200	PF05804,PF04564	PTHR22849,PTHR22849:SF40		6.3.2.19		GO:0016567,GO:0004842	AT4G36550.1		ARM repeat superfamily protein
Glyma.16G138300	PF05804,PF04564	PTHR22849,PTHR22849:SF40		6.3.2.19		GO:0016567,GO:0004842	AT4G36550.1		ARM repeat superfamily protein
Glyma.16G138300	PF05804,PF04564	PTHR22849,PTHR22849:SF40		6.3.2.19		GO:0016567,GO:0004842	AT4G36550.1		ARM repeat superfamily protein
Glyma.16G138300	PF05804,PF04564	PTHR22849,PTHR22849:SF40		6.3.2.19		GO:0016567,GO:0004842	AT4G36550.1		ARM repeat superfamily protein
Glyma.16G138300	PF05804,PF04564	PTHR22849,PTHR22849:SF40		6.3.2.19		GO:0016567,GO:0004842	AT4G36550.1		ARM repeat superfamily protein
Glyma.16G138300	PF04564	PTHR22849,PTHR22849:SF40		6.3.2.19		GO:0016567,GO:0004842	AT4G36550.1		ARM repeat superfamily protein
Glyma.16G138300	PF04564	PTHR22849,PTHR22849:SF40		6.3.2.19		GO:0016567,GO:0004842	AT4G36550.1		ARM repeat superfamily protein
Glyma.16G138300	PF04564	PTHR22849,PTHR22849:SF40		6.3.2.19		GO:0016567,GO:0004842	AT4G36550.1		ARM repeat superfamily protein
Glyma.16G138300	PF04564	PTHR22849,PTHR22849:SF40		6.3.2.19		GO:0016567,GO:0004842	AT4G36550.1		ARM repeat superfamily protein
Glyma.16G138300	PF05804,PF04564	PTHR22849,PTHR22849:SF40		6.3.2.19		GO:0016567,GO:0004842	AT4G36550.1		ARM repeat superfamily protein
Glyma.16G138300	PF05804,PF04564	PTHR22849,PTHR22849:SF40		6.3.2.19		GO:0016567,GO:0004842	AT4G36550.1		ARM repeat superfamily protein
Glyma.16G138300	PF00249	PTHR24078,PTHR24078:SF177					AT1G75250.1	ATRL6,RL6,RSM3	RAD-like 6
Glyma.16G138400		PTHR24078,PTHR24078:SF177					AT1G19510.1	ATRL5,RL5,RSM4	RAD-like 5
Glyma.16G138500				3.1.1.3,3.1.1.13
Glyma.16G138600	PF04770	PTHR31948					AT1G75240.1	AtHB33,HB33	homeobox protein 33
Glyma.16G138700	PF04770	PTHR31948					AT1G75240.1	AtHB33,HB33	homeobox protein 33
Glyma.16G138700	PF04770	PTHR31948					AT1G75240.1	AtHB33,HB33	homeobox protein 33
Glyma.16G138700	PF07690	PTHR23500,PTHR23500:SF43	KOG0254		K08145	GO:0055085,GO:0016021	AT1G75220.1		Major facilitator superfamily protein
Glyma.16G138800	PF07690	PTHR23500,PTHR23500:SF43	KOG0254			GO:0055085,GO:0016021	AT1G75220.1		Major facilitator superfamily protein
Glyma.16G138800	PF07690	PTHR23500,PTHR23500:SF43	KOG0254			GO:0055085,GO:0016021	AT1G75220.1		Major facilitator superfamily protein
Glyma.16G138800	PF00083	PTHR23500,PTHR23500:SF43				GO:0055085,GO:0022857,GO:0016021	AT1G75220.1		Major facilitator superfamily protein
Glyma.16G138900	PF07690	PTHR23500,PTHR23500:SF43				GO:0055085,GO:0016021	AT1G75220.1		Major facilitator superfamily protein
Glyma.16G139000		PTHR10992,PTHR10992:SF838					AT2G18360.1		alpha/beta-Hydrolases superfamily protein
Glyma.16G139100	PF14291	PTHR11697					AT4G09660.1
Glyma.16G139200		PTHR23227,PTHR23227:SF41
Glyma.16G139300	PF00320	PTHR10071,PTHR10071:SF156				GO:0043565,GO:0008270,GO:0006355,GO:0003700	AT3G50870.1	GATA18,HAN,MNP	GATA type zinc finger transcription factor family protein
Glyma.16G139400	PF02545	PTHR11746,PTHR11746:SF89	KOG1509		K06287	GO:0005737	AT5G66550.1		Maf-like protein
Glyma.16G139500	PF02545	PTHR11746,PTHR11746:SF89	KOG1509			GO:0005737	AT5G66550.1		Maf-like protein
Glyma.16G139500	PF02545					GO:0005737	AT5G66550.1		Maf-like protein
Glyma.16G139500	PF02545	PTHR11746,PTHR11746:SF89	KOG1509			GO:0005737	AT5G66550.1		Maf-like protein
Glyma.16G139500	PF01593	PTHR10668,PTHR10668:SF83				GO:0055114,GO:0016491	AT5G49555.1		FAD/NAD(P)-binding oxidoreductase family protein
Glyma.16G139600	PF01217	PTHR11753,PTHR11753:SF2	KOG0936		K12399	GO:0015031,GO:0008565,GO:0030123	AT3G50860.1		Clathrin adaptor complex small chain family protein
Glyma.16G139700	PF01217	PTHR11753,PTHR11753:SF2				GO:0015031,GO:0008565,GO:0030123	AT3G50860.1		Clathrin adaptor complex small chain family protein
Glyma.16G139700	PF13041	PTHR24015,PTHR24015:SF547			K17710		AT1G12300.1		Tetratricopeptide repeat (TPR)-like superfamily protein
Glyma.16G139800	PF13041	PTHR24015,PTHR24015:SF547					AT1G12300.1		Tetratricopeptide repeat (TPR)-like superfamily protein
Glyma.16G139800	PF13041	PTHR24015,PTHR24015:SF547					AT1G12300.1		Tetratricopeptide repeat (TPR)-like superfamily protein
Glyma.16G139800	PF04863,PF04864	PTHR11751,PTHR11751:SF126		4.4.1.4		GO:0016846	AT1G34060.1		Pyridoxal phosphate (PLP)-dependent transferases superfamily protein
Glyma.16G139900	PF07714	PTHR24347,PTHR24347:SF220	KOG0580	2.7.11.1		GO:0006468,GO:0004672	AT4G18700.1	ATWL4,CIPK12,SnRK3.9,WL4	CBL-interacting protein kinase 12
Glyma.16G140000	PF01433	PTHR11533,PTHR11533:SF189		3.4.11.2		GO:0008270,GO:0008237,GO:0006508	AT4G33090.1	APM1,ATAPM1	aminopeptidase M1
Glyma.16G140100	PF00352	PTHR10126,PTHR10126:SF23	KOG3302		K03120	GO:0006352,GO:0003677	AT1G55520.1	ATTBP2,TBP2	TATA binding protein 2
Glyma.16G140200	PF00352	PTHR10126,PTHR10126:SF23	KOG3302		K03120	GO:0006352,GO:0003677	AT3G13445.2	TBP1,TFIID-1	TATA binding protein 1
Glyma.16G140200	PF00352	PTHR10126,PTHR10126:SF23	KOG3302		K03120	GO:0006352,GO:0003677	AT1G55520.1	ATTBP2,TBP2	TATA binding protein 2
Glyma.16G140200	PF00352	PTHR10126,PTHR10126:SF23	KOG3302		K03120	GO:0006352,GO:0003677	AT1G55520.2	ATTBP2,TBP2	TATA binding protein 2
Glyma.16G140200	PF00352	PTHR10126,PTHR10126:SF23				GO:0006352,GO:0003677	AT3G13445.1	TBP1,TFIID-1	TATA binding protein 1
Glyma.16G140200	PF13716,PF03765	PTHR10174,PTHR10174:SF149	KOG1470				AT4G36640.1		Sec14p-like phosphatidylinositol transfer family protein
Glyma.16G140300	PF13716,PF03765	PTHR10174,PTHR10174:SF149	KOG1470				AT4G36640.1		Sec14p-like phosphatidylinositol transfer family protein
Glyma.16G140300		PTHR24006,PTHR24006:SF149					AT3G48880.2		RNI-like superfamily protein
Glyma.16G140400		PTHR36410,PTHR36410:SF1					AT5G66780.1
Glyma.16G140500		PTHR33918,PTHR33918:SF1
Glyma.16G140600	PF07714	PTHR27001,PTHR27001:SF192	KOG1187	2.7.11.1	K04730	GO:0006468,GO:0004672	AT2G18470.1	PERK4	roline-rich extensin-like receptor kinase 4
Glyma.16G140700	PF14580	PTHR11375	KOG2739				AT3G50690.1		Leucine-rich repeat (LRR) family protein
Glyma.16G140800		PTHR31080,PTHR31080:SF23					AT3G17130.1		Plant invertase/pectin methylesterase inhibitor superfamily protein
Glyma.16G140900	PF00083	PTHR23500,PTHR23500:SF154	KOG0254			GO:0055085,GO:0022857,GO:0016021	AT2G18480.1		Major facilitator superfamily protein
Glyma.16G141000	PF12171	PTHR10593,PTHR10593:SF28					AT5G66730.1		C2H2-like zinc finger protein
Glyma.16G141100	PF12171	PTHR10593,PTHR10593:SF28					AT5G66730.1		C2H2-like zinc finger protein
Glyma.16G141100	PF07228	PTHR12320,PTHR12320:SF16	KOG1379	3.1.3.16		GO:0003824	AT4G16580.1		Protein phosphatase 2C family protein
Glyma.16G141200	PF07228	PTHR12320,PTHR12320:SF16	KOG1379	3.1.3.16		GO:0003824	AT4G16580.1		Protein phosphatase 2C family protein
Glyma.16G141200	PF07228	PTHR12320,PTHR12320:SF16	KOG1379	3.1.3.16		GO:0003824	AT4G16580.1		Protein phosphatase 2C family protein
Glyma.16G141200	PF07228	PTHR12320,PTHR12320:SF16	KOG1379	3.1.3.16		GO:0003824	AT4G16580.1		Protein phosphatase 2C family protein
Glyma.16G141200	PF07228	PTHR12320,PTHR12320:SF16	KOG1379	3.1.3.16		GO:0003824	AT4G16580.1		Protein phosphatase 2C family protein
Glyma.16G141200	PF03514	PTHR31636,PTHR31636:SF53					AT4G36710.1		GRAS family transcription factor
Glyma.16G141300
Glyma.16G141400	PF00170,PF07777	PTHR22952,PTHR22952:SF123			K09060	GO:0043565,GO:0006355,GO:0003700	AT4G36730.1	GBF1	G-box binding factor 1
Glyma.16G141500	PF00170,PF07777	PTHR22952,PTHR22952:SF123			K09060	GO:0043565,GO:0006355,GO:0003700	AT4G36730.1	GBF1	G-box binding factor 1
Glyma.16G141500	PF00170,PF07777	PTHR22952,PTHR22952:SF123			K09060	GO:0043565,GO:0006355,GO:0003700	AT4G36730.1	GBF1	G-box binding factor 1
Glyma.16G141500	PF00170,PF07777	PTHR22952,PTHR22952:SF123			K09060	GO:0043565,GO:0006355,GO:0003700	AT4G36730.1	GBF1	G-box binding factor 1
Glyma.16G141500	PF00170,PF07777	PTHR22952,PTHR22952:SF123			K09060	GO:0043565,GO:0006355,GO:0003700	AT4G36730.1	GBF1	G-box binding factor 1
Glyma.16G141500	PF00170,PF07777	PTHR22952,PTHR22952:SF123			K09060	GO:0043565,GO:0006355,GO:0003700	AT4G36730.1	GBF1	G-box binding factor 1
Glyma.16G141500	PF00170,PF07777	PTHR22952,PTHR22952:SF123			K09060	GO:0043565,GO:0006355,GO:0003700	AT4G36730.1	GBF1	G-box binding factor 1
Glyma.16G141500	PF00069	PTHR23257,PTHR23257:SF535	KOG0192	2.7.12.1		GO:0006468,GO:0005524,GO:0004672	AT5G66710.1		Protein kinase superfamily protein
Glyma.16G141600	PF00069	PTHR23257,PTHR23257:SF535	KOG0192	2.7.12.1		GO:0006468,GO:0005524,GO:0004672	AT5G66710.1		Protein kinase superfamily protein
Glyma.16G141600	PF00348	PTHR12001,PTHR12001:SF52	KOG0776	2.5.1.29	K13789	GO:0008299	AT4G36810.1	GGPS1	geranylgeranyl pyrophosphate synthase 1
Glyma.16G141700	PF05055	PTHR31113,PTHR31113:SF3					AT2G18630.1		Protein of unknown function (DUF677)
Glyma.16G141800	PF05055	PTHR31113,PTHR31113:SF3					AT2G18630.1		Protein of unknown function (DUF677)
Glyma.16G141800
Glyma.16G141900
Glyma.16G142000	PF04678	PTHR13462,PTHR13462:SF4	KOG2966				AT2G23790.1		Protein of unknown function (DUF607)
Glyma.16G142100	PF01151	PTHR11157,PTHR11157:SF11	KOG3071	2.3.1.199,6.2.1.2		GO:0016021	AT4G36830.1	HOS3-1	GNS1/SUR4 membrane protein family
Glyma.16G142200	PF04193	PTHR16201,PTHR16201:SF43	KOG2913				AT4G36850.1		PQ-loop repeat family protein / transmembrane family protein
Glyma.16G142300	PF00544	PTHR31683,PTHR31683:SF8		4.2.2.2	K01728		AT5G09280.1		Pectin lyase-like superfamily protein
Glyma.16G142400	PF13833,PF13499	PTHR10891,PTHR10891:SF568	KOG0027		K13448		AT3G50770.1	CML41	calmodulin-like 41
Glyma.16G142500	PF11698,PF03224	PTHR10698	KOG2759		K02144	GO:0016820,GO:0015991,GO:0000221,GO:0046961	AT3G42050.1		vacuolar ATP synthase subunit H family protein
Glyma.16G142600	PF00412,PF12315	PTHR24209,PTHR24209:SF13	KOG1703			GO:0008270	AT4G36860.1	DAR1	LIM domain-containing protein
Glyma.16G142700	PF00412,PF12315	PTHR24209,PTHR24209:SF13	KOG1703			GO:0008270	AT4G36860.1	DAR1	LIM domain-containing protein
Glyma.16G142700	PF05920,PF07526	PTHR11850,PTHR11850:SF103	KOG0773			GO:0006355,GO:0003677	AT4G36870.1	BLH2,SAW1	BEL1-like homeodomain 2
Glyma.16G142800	PF05920,PF07526	PTHR11850,PTHR11850:SF103	KOG0773			GO:0006355,GO:0003677	AT4G36870.1	BLH2,SAW1	BEL1-like homeodomain 2
Glyma.16G142800
Glyma.16G142900		PTHR31060,PTHR31060:SF5					AT3G50780.1
Glyma.16G143000		PTHR31060,PTHR31060:SF5					AT3G50780.1
Glyma.16G143000	PF05033,PF00856	PTHR22884,PTHR22884:SF299	KOG1082	2.1.1.43		GO:0034968,GO:0018024,GO:0008270,GO:0005634,GO:0005515	AT2G23740.2		nucleic acid binding;sequence-specific DNA binding transcription factors;zinc ion binding
Glyma.16G143100	PF05033,PF00856	PTHR22884,PTHR22884:SF299	KOG1082	2.1.1.43		GO:0034968,GO:0018024,GO:0008270,GO:0005634,GO:0005515	AT2G23740.2		nucleic acid binding;sequence-specific DNA binding transcription factors;zinc ion binding
Glyma.16G143100	PF05033,PF00856	PTHR22884,PTHR22884:SF299	KOG1082	2.1.1.43		GO:0034968,GO:0018024,GO:0008270,GO:0005634,GO:0005515	AT2G23740.2		nucleic acid binding;sequence-specific DNA binding transcription factors;zinc ion binding
Glyma.16G143100	PF05033,PF00856	PTHR22884,PTHR22884:SF299	KOG1082	2.1.1.43		GO:0034968,GO:0018024,GO:0008270,GO:0005634,GO:0005515	AT2G23740.2		nucleic acid binding;sequence-specific DNA binding transcription factors;zinc ion binding
Glyma.16G143100	PF05033,PF00856	PTHR22884,PTHR22884:SF299	KOG1082	2.1.1.43		GO:0034968,GO:0018024,GO:0008270,GO:0005634,GO:0005515	AT2G23740.2		nucleic acid binding;sequence-specific DNA binding transcription factors;zinc ion binding
Glyma.16G143100	PF05033,PF00856	PTHR22884,PTHR22884:SF299	KOG1082	2.1.1.43		GO:0034968,GO:0018024,GO:0008270,GO:0005634,GO:0005515	AT2G23740.2		nucleic acid binding;sequence-specific DNA binding transcription factors;zinc ion binding
Glyma.16G143100	PF05033,PF00856	PTHR22884,PTHR22884:SF299	KOG1082	2.1.1.43		GO:0034968,GO:0018024,GO:0008270,GO:0005634,GO:0005515	AT2G23740.2		nucleic acid binding;sequence-specific DNA binding transcription factors;zinc ion binding
Glyma.16G143100	PF14389,PF04784	PTHR23054,PTHR23054:SF18					AT5G66600.1		Protein of unknown function, DUF547
Glyma.16G143200	PF14389,PF04784	PTHR23054,PTHR23054:SF18					AT5G66600.1		Protein of unknown function, DUF547
Glyma.16G143200	PF00188	PTHR10334,PTHR10334:SF207					AT5G66590.1		CAP (Cysteine-rich secretory proteins, Antigen 5, and Pathogenesis-related 1 protein) superfamily protein
Glyma.16G143300	PF14009	PTHR33052,PTHR33052:SF17					AT2G23690.1
Glyma.16G143400	PF04535	PTHR32021,PTHR32021:SF2					AT3G50810.1		Uncharacterised protein family (UPF0497)
Glyma.16G143500	PF04535	PTHR32021,PTHR32021:SF2					AT3G50810.1		Uncharacterised protein family (UPF0497)
Glyma.16G143500	PF01716	PTHR34058,PTHR34058:SF1			K02716	GO:0042549,GO:0019898,GO:0015979,GO:0009654,GO:0009523,GO:0005509	AT3G50820.1	OEC33,PSBO-2,PSBO2	photosystem II subunit O-2
Glyma.16G143600	PF05562	PTHR33596,PTHR33596:SF1					AT3G50830.1	ATCOR413-PM2,COR413-PM2	cold-regulated 413-plasma membrane 2
Glyma.16G143700	PF03000	PTHR32370,PTHR32370:SF8					AT5G66560.1		Phototropic-responsive NPH3 family protein
Glyma.16G143800	PF03000	PTHR32370,PTHR32370:SF8					AT5G66560.1		Phototropic-responsive NPH3 family protein
Glyma.16G143800	PF03000	PTHR32370,PTHR32370:SF8					AT5G66560.1		Phototropic-responsive NPH3 family protein
Glyma.16G143800		PTHR34724,PTHR34724:SF2
Glyma.16G143900	PF00069	PTHR27005,PTHR27005:SF34	KOG1187	2.7.11.1		GO:0006468,GO:0005524,GO:0004672	AT2G23450.1		Protein kinase superfamily protein
Glyma.16G144000	PF00069	PTHR27005,PTHR27005:SF34	KOG1187	2.7.11.1		GO:0006468,GO:0005524,GO:0004672	AT2G23450.2		Protein kinase superfamily protein
Glyma.16G144000	PF00069	PTHR27005,PTHR27005:SF34	KOG1187	2.7.11.1		GO:0006468,GO:0005524,GO:0004672	AT2G23450.1		Protein kinase superfamily protein
Glyma.16G144000	PF00069	PTHR27005,PTHR27005:SF34	KOG1187	2.7.11.1		GO:0006468,GO:0005524,GO:0004672	AT2G23450.1		Protein kinase superfamily protein
Glyma.16G144000		PTHR35324
Glyma.16G144100	PF06650	PTHR16166,PTHR16166:SF98					AT3G50380.1		Protein of unknown function (DUF1162)
Glyma.16G144200		PTHR16166,PTHR16166:SF98					AT3G50380.1		Protein of unknown function (DUF1162)
Glyma.16G144200		PTHR16166,PTHR16166:SF98					AT3G50380.1		Protein of unknown function (DUF1162)
Glyma.16G144200	PF02892,PF05699,PF04937	PTHR32166,PTHR32166:SF22				GO:0003677,GO:0046983	AT5G33406.1		hAT dimerisation domain-containing protein / transposase-related
Glyma.16G144300
Glyma.16G144400
Glyma.16G144400		PTHR14237,PTHR14237:SF31		2.8.1.9			AT2G23520.1		Pyridoxal phosphate (PLP)-dependent transferases superfamily protein
Glyma.16G144500	PF00503	PTHR10218,PTHR10218:SF222	KOG0082			GO:0031683,GO:0019001,GO:0007186,GO:0004871,GO:0003924	AT2G23460.1	ATXLG1,XLG1	extra-large G-protein 1
Glyma.16G144600	PF02897,PF00326	PTHR11757,PTHR11757:SF6		3.4.21.83		GO:0070008,GO:0004252,GO:0008236,GO:0006508	AT5G66960.1		Prolyl oligopeptidase family protein
Glyma.16G144700		PTHR14237,PTHR14237:SF31		2.8.1.9			AT2G23520.1		Pyridoxal phosphate (PLP)-dependent transferases superfamily protein
Glyma.16G144800	PF00657	PTHR22835,PTHR22835:SF147		3.1.1.3		GO:0016788	AT2G23540.1		GDSL-like Lipase/Acylhydrolase superfamily protein
Glyma.16G144900	PF02701	PTHR31992,PTHR31992:SF12				GO:0006355,GO:0003677	AT3G50410.1	OBP1	OBF binding protein 1
Glyma.16G145000	PF12697	PTHR10992,PTHR10992:SF820					AT2G23620.1	ATMES1,MES1	methyl esterase 1
Glyma.16G145100	PF12697	PTHR10992,PTHR10992:SF820					AT5G10300.1	ATMES5,HNL,MES5	methyl esterase 5
Glyma.16G145200	PF12697	PTHR10992,PTHR10992:SF820	KOG1454				AT2G23620.1	ATMES1,MES1	methyl esterase 1
Glyma.16G145200	PF00450	PTHR11802,PTHR11802:SF71		3.4.16.6	K16297	GO:0006508,GO:0004185	AT3G07990.1	SCPL27	serine carboxypeptidase-like 27
Glyma.16G145300	PF00450	PTHR11802,PTHR11802:SF71		3.4.16.6		GO:0006508,GO:0004185	AT3G07990.1	SCPL27	serine carboxypeptidase-like 27
Glyma.16G145300	PF00335	PTHR32191,PTHR32191:SF1				GO:0016021	AT3G12090.1	TET6	tetraspanin6
Glyma.16G145400	PF03094	PTHR31942,PTHR31942:SF29			K08472	GO:0016021,GO:0006952	AT2G39200.1	ATMLO12,MLO12	Seven transmembrane MLO family protein
Glyma.16G145500	PF03094	PTHR31942,PTHR31942:SF29			K08472	GO:0016021,GO:0006952	AT2G39200.1	ATMLO12,MLO12	Seven transmembrane MLO family protein
Glyma.16G145600	PF03094	PTHR31942,PTHR31942:SF29				GO:0016021,GO:0006952	AT2G39200.1	ATMLO12,MLO12	Seven transmembrane MLO family protein
Glyma.16G145600	PF01694	PTHR13377,PTHR13377:SF4	KOG2890			GO:0016021,GO:0004252	AT3G07950.1		rhomboid protein-related
Glyma.16G145700	PF00504	PTHR21649,PTHR21649:SF7			K08907	GO:0016020,GO:0009765	AT3G54890.1	LHCA1	photosystem I light harvesting complex gene 1
Glyma.16G145800	PF01529	PTHR22883,PTHR22883:SF80	KOG1311	2.3.1.225	K16675	GO:0008270	AT3G26935.1		DHHC-type zinc finger family protein
Glyma.16G145900	PF01529	PTHR22883,PTHR22883:SF80	KOG1311	2.3.1.225	K16675	GO:0008270	AT3G26935.1		DHHC-type zinc finger family protein
Glyma.16G145900	PF01529	PTHR22883,PTHR22883:SF80	KOG1311	2.3.1.225	K16675	GO:0008270	AT3G26935.1		DHHC-type zinc finger family protein
Glyma.16G145900	PF01922	PTHR17453,PTHR17453:SF0	KOG3198		K03105	GO:0048500,GO:0008312,GO:0006614	AT1G48160.1		signal recognition particle 19 kDa protein, putative / SRP19, putative
Glyma.16G146000		PTHR35736,PTHR35736:SF1					AT3G26950.1
Glyma.16G146100		PTHR35736,PTHR35736:SF1					AT3G26950.1
Glyma.16G146100		PTHR35736,PTHR35736:SF1					AT3G26950.1
Glyma.16G146100		PTHR35736,PTHR35736:SF1					AT3G26950.1
Glyma.16G146100		PTHR35736,PTHR35736:SF1					AT3G26950.1
Glyma.16G146100		PTHR35736,PTHR35736:SF1					AT3G26950.1
Glyma.16G146100
Glyma.16G146200		PTHR31568					AT2G33520.1
Glyma.16G146300		PTHR24006,PTHR24006:SF456	KOG1947				AT3G26810.1	AFB2	auxin signaling F-box 2
Glyma.16G146400	PF00155	PTHR13693,PTHR13693:SF62		2.3.1.50	K00654	GO:0030170,GO:0009058	AT5G23670.1	LCB2	long chain base2
Glyma.16G146500	PF03223	PTHR10137	KOG2909		K02148	GO:0033180,GO:0015991,GO:0015078	AT1G12840.1	ATVHA-C,DET3	vacuolar ATP synthase subunit C (VATC) / V-ATPase C subunit / vacuolar proton pump C subunit (DET3)
Glyma.16G146600	PF03223	PTHR10137	KOG2909			GO:0033180,GO:0015991,GO:0015078	AT1G12840.1	ATVHA-C,DET3	vacuolar ATP synthase subunit C (VATC) / V-ATPase C subunit / vacuolar proton pump C subunit (DET3)
Glyma.16G146600	PF00153	PTHR24089,PTHR24089:SF269			K15102		AT5G14040.1	PHT3;1	phosphate transporter 3;1
Glyma.16G146700							AT1G12845.1
Glyma.16G146800	PF00300	PTHR23029,PTHR23029:SF39	KOG0234	5.4.2.11			AT3G26780.1		Phosphoglycerate mutase family protein
Glyma.16G146900	PF01582	PTHR11017,PTHR11017:SF171				GO:0007165,GO:0005515	AT5G36930.2		Disease resistance protein (TIR-NBS-LRR class) family
Glyma.16G147000
Glyma.16G147100	PF00010	PTHR31945,PTHR31945:SF13				GO:0046983	AT3G26744.2	ATICE1,ICE1,SCRM	basic helix-loop-helix (bHLH) DNA-binding superfamily protein
Glyma.16G147200	PF00696	PTHR21499,PTHR21499:SF34		2.7.2.4	K00928		AT5G13280.1	AK,AK-LYS1,AK1	aspartate kinase 1
Glyma.16G147300	PF00931,PF01582	PTHR11017,PTHR11017:SF171				GO:0043531,GO:0007165,GO:0005515	AT5G36930.2		Disease resistance protein (TIR-NBS-LRR class) family
Glyma.16G147400	PF00931,PF01582	PTHR11017,PTHR11017:SF171				GO:0043531,GO:0007165,GO:0005515	AT5G17680.1		disease resistance protein (TIR-NBS-LRR class), putative
Glyma.16G147400	PF00847	PTHR31190,PTHR31190:SF1				GO:0006355,GO:0003700	AT5G61890.1		Integrase-type DNA-binding superfamily protein
Glyma.16G147500	PF00355,PF02921	PTHR10134,PTHR10134:SF1	KOG1671	1.10.2.2	K00411	GO:0055114,GO:0051537,GO:0016491,GO:0008121,GO:0016679	AT5G13430.1		Ubiquinol-cytochrome C reductase iron-sulfur subunit
Glyma.16G147600	PF12046	PTHR35302,PTHR35302:SF1					AT3G26710.1	CCB1	cofactor assembly of complex C
Glyma.16G147700		PTHR13052,PTHR13052:SF2		3.6.4.13		GO:0031011	AT3G45830.1
Glyma.16G147800		PTHR13052,PTHR13052:SF2		3.6.4.13		GO:0031011	AT3G45830.1
Glyma.16G147800		PTHR13052,PTHR13052:SF2		3.6.4.13		GO:0031011	AT3G45830.1
Glyma.16G147800	PF12576	PTHR33645,PTHR33645:SF3					AT3G19340.1		Protein of unknown function (DUF3754)
Glyma.16G147900	PF12576	PTHR33645,PTHR33645:SF3					AT3G19340.1		Protein of unknown function (DUF3754)
Glyma.16G147900	PF12576	PTHR33645,PTHR33645:SF3					AT3G19340.1		Protein of unknown function (DUF3754)
Glyma.16G147900	PF12576	PTHR33645,PTHR33645:SF3					AT3G19340.1		Protein of unknown function (DUF3754)
Glyma.16G147900	PF05055	PTHR31113,PTHR31113:SF5					AT3G19330.1		Protein of unknown function (DUF677)
Glyma.16G148000		PTHR36074					AT5G55610.1
Glyma.16G148100
Glyma.16G148200	PF02458	PTHR31642,PTHR31642:SF57		2.3.1.133	K13065	GO:0016747	AT2G19070.1	SHT	spermidine hydroxycinnamoyl transferase
Glyma.16G148300	PF01667	PTHR11594				GO:0006412,GO:0005840,GO:0005622,GO:0003735	AT3G61110.1	ARS27A,RS27A	ribosomal protein S27
Glyma.16G148400	PF01667	PTHR11594	KOG1779		K02978	GO:0006412,GO:0005840,GO:0005622,GO:0003735	AT3G61110.1	ARS27A,RS27A	ribosomal protein S27
Glyma.16G148500	PF00293	PTHR12629,PTHR12629:SF11	KOG2839		K07766	GO:0016787	AT1G12880.1	atnudt12,NUDT12	nudix hydrolase homolog 12
Glyma.16G148600	PF00847	PTHR31677,PTHR31677:SF5			K09286	GO:0006355,GO:0003700	AT5G13910.1	LEP	Integrase-type DNA-binding superfamily protein
Glyma.16G148700	PF02705	PTHR30540,PTHR30540:SF9			K03549	GO:0071805,GO:0016020,GO:0015079	AT3G02050.1	ATKT4,ATKUP3,KUP3	K+ uptake transporter 3
Glyma.16G148800	PF14368	PTHR33044,PTHR33044:SF29					AT5G13900.1		Bifunctional inhibitor/lipid-transfer protein/seed storage 2S albumin superfamily protein
Glyma.16G148900	PF03140	PTHR31549,PTHR31549:SF27					AT3G50120.1		Plant protein of unknown function (DUF247)
Glyma.16G149000	PF01554	PTHR11206,PTHR11206:SF87				GO:0055085,GO:0016020,GO:0015297,GO:0015238,GO:0006855	AT1G66760.2		MATE efflux family protein
Glyma.16G149100		PTHR24298,PTHR24298:SF118		1.14.13.52			AT4G37310.1	CYP81H1	cytochrome P450, family 81, subfamily H, polypeptide 1
Glyma.16G149200	PF00067	PTHR24298,PTHR24298:SF61		1.14.13.89	K13260	GO:0055114,GO:0020037,GO:0016705,GO:0005506	AT4G37330.1	CYP81D4	cytochrome P450, family 81, subfamily D, polypeptide 4
Glyma.16G149300	PF00067	PTHR24298,PTHR24298:SF61		1.14.13.52		GO:0055114,GO:0020037,GO:0016705,GO:0005506	AT4G37360.1	CYP81D2	cytochrome P450, family 81, subfamily D, polypeptide 2
Glyma.16G149400	PF05653	PTHR12570,PTHR12570:SF9	KOG2922			GO:0016021,GO:0015693,GO:0015095	AT3G26670.1		Protein of unknown function (DUF803)
Glyma.16G149500	PF05553	PTHR33265,PTHR33265:SF6					AT1G52140.1
Glyma.16G149600	PF13891	PTHR16198					AT2G31600.1
Glyma.16G149700	PF04438,PF00271,PF00270	PTHR24031,PTHR24031:SF42	KOG0331	3.6.4.13		GO:0005524,GO:0003676	AT3G02065.3		P-loop containing nucleoside triphosphate hydrolases superfamily protein
Glyma.16G149800	PF00271,PF00270	PTHR24031,PTHR24031:SF42	KOG0331	3.6.4.13		GO:0005524,GO:0003676	AT3G02065.2		P-loop containing nucleoside triphosphate hydrolases superfamily protein
Glyma.16G149800	PF00271,PF00270	PTHR24031,PTHR24031:SF42	KOG0331	3.6.4.13		GO:0005524,GO:0003676	AT3G02065.2		P-loop containing nucleoside triphosphate hydrolases superfamily protein
Glyma.16G149800	PF13891	PTHR16198					AT2G31600.1
Glyma.16G149900	PF03463,PF03465,PF03464	PTHR10113,PTHR10113:SF8			K03265	GO:0016149,GO:0006415,GO:0005737	AT3G26618.1	ERF1-3	eukaryotic release factor 1-3
Glyma.16G150000		PTHR22814,PTHR22814:SF115	KOG1603				AT5G27690.1		Heavy metal transport/detoxification superfamily protein
Glyma.16G150100	PF02800,PF00044	PTHR10836,PTHR10836:SF49	KOG0657	1.2.1.12,1.2.1.13		GO:0055114,GO:0016620	AT3G26650.1	GAPA,GAPA-1	glyceraldehyde 3-phosphate dehydrogenase A subunit
Glyma.16G150200	PF06955,PF00722	PTHR31062,PTHR31062:SF15		2.4.1.207	K08235	GO:0048046,GO:0016762,GO:0006073,GO:0005618,GO:0005975,GO:0004553	AT5G13870.1	EXGT-A4,XTH5	xyloglucan endotransglucosylase/hydrolase 5
Glyma.16G150300	PF06955,PF00722	PTHR31062,PTHR31062:SF15		2.4.1.207		GO:0048046,GO:0016762,GO:0006073,GO:0005618,GO:0005975,GO:0004553	AT5G13870.1	EXGT-A4,XTH5	xyloglucan endotransglucosylase/hydrolase 5
Glyma.16G150300	PF02338	PTHR12419,PTHR12419:SF3		3.4.19.12			AT3G02070.1		Cysteine proteinases superfamily protein
Glyma.16G150400
Glyma.16G150500	PF02458	PTHR31642,PTHR31642:SF40		2.3.1.188		GO:0016747	AT1G65450.1		HXXXD-type acyl-transferase family protein
Glyma.16G150600	PF01161	PTHR11362,PTHR11362:SF9	KOG3346		K16223	GO:0048573,GO:0009909,GO:0008429	AT1G65480.1	FT	PEBP (phosphatidylethanolamine-binding protein) family protein
Glyma.16G150700	PF03081	PTHR12542,PTHR12542:SF27				GO:0006887,GO:0000145	AT1G72470.1	ATEXO70D1,EXO70D1	exocyst subunit exo70 family protein D1
Glyma.16G150800	PF01026					GO:0016888	AT5G17570.1		TatD related DNase
Glyma.16G150900	PF01161	PTHR11362,PTHR11362:SF9	KOG3346		K16223	GO:0048573,GO:0009909,GO:0008429	AT1G65480.1	FT	PEBP (phosphatidylethanolamine-binding protein) family protein
Glyma.16G151000	PF01026	PTHR10060,PTHR10060:SF24	KOG3020		K03424	GO:0016888	AT5G17570.1		TatD related DNase
Glyma.16G151100	PF01026	PTHR10060,PTHR10060:SF24	KOG3020		K03424	GO:0016888	AT5G17570.1		TatD related DNase
Glyma.16G151100	PF01026	PTHR10060,PTHR10060:SF24	KOG3020			GO:0016888	AT5G17570.1		TatD related DNase
Glyma.16G151100	PF01026	PTHR10060,PTHR10060:SF24	KOG3020		K03424	GO:0016888	AT5G17570.1		TatD related DNase
Glyma.16G151100	PF01026	PTHR10060,PTHR10060:SF24	KOG3020		K03424	GO:0016888	AT5G17570.1		TatD related DNase
Glyma.16G151100	PF01026	PTHR10060,PTHR10060:SF24	KOG3020			GO:0016888	AT5G17570.1		TatD related DNase
Glyma.16G151100	PF01026	PTHR10060,PTHR10060:SF24	KOG3020		K03424	GO:0016888	AT5G17570.1		TatD related DNase
Glyma.16G151100	PF05739,PF00804	PTHR19957,PTHR19957:SF91	KOG0810		K08486	GO:0005515,GO:0016020	AT1G08560.1	ATSYP111,KN,SYP111	syntaxin of plants 111
Glyma.16G151200	PF00230	PTHR19139,PTHR19139:SF75	KOG0223		K09875	GO:0016020,GO:0006810,GO:0005215	AT5G18290.1	SIP1;2,SIP1B	Aquaporin-like superfamily protein
Glyma.16G151300	PF01150	PTHR11782,PTHR11782:SF50	KOG1385	3.6.1.5		GO:0016787	AT3G04080.1	APY1,ATAPY1	apyrase 1
Glyma.16G151400	PF01150	PTHR11782,PTHR11782:SF50		3.6.1.5		GO:0016787	AT3G04080.1	APY1,ATAPY1	apyrase 1
Glyma.16G151400	PF02365	PTHR31719,PTHR31719:SF32				GO:0006355,GO:0003677	AT3G04070.2	anac047,NAC047	NAC domain containing protein 47
Glyma.16G151500	PF04398	PTHR31676,PTHR31676:SF23					AT4G02360.1		Protein of unknown function, DUF538
Glyma.16G151600	PF03725,PF01138	PTHR11097,PTHR11097:SF8	KOG1612		K12589		AT3G07750.1		3\'-5\'-exoribonuclease family protein
Glyma.16G151700	PF03725,PF01138	PTHR11097,PTHR11097:SF8	KOG1612		K12589		AT3G07750.1		3\'-5\'-exoribonuclease family protein
Glyma.16G151700	PF01221	PTHR11886,PTHR11886:SF39	KOG3430	3.6.4.2	K10418	GO:0007017,GO:0005875	AT1G23220.1		Dynein light chain type 1 family protein
Glyma.16G151800	PF07983,PF00332	PTHR32227,PTHR32227:SF61		3.2.1.39		GO:0005975,GO:0004553	AT2G01630.1		O-Glycosyl hydrolases family 17 protein
Glyma.16G151900	PF07983,PF00332	PTHR32227,PTHR32227:SF61		3.2.1.39		GO:0005975,GO:0004553	AT1G11820.2		O-Glycosyl hydrolases family 17 protein
Glyma.16G151900	PF07983,PF00332	PTHR32227,PTHR32227:SF61		3.2.1.39		GO:0005975,GO:0004553	AT1G11820.2		O-Glycosyl hydrolases family 17 protein
Glyma.16G151900	PF07983,PF00332	PTHR32227,PTHR32227:SF61		3.2.1.39		GO:0005975,GO:0004553	AT1G11820.2		O-Glycosyl hydrolases family 17 protein
Glyma.16G151900	PF07983,PF00332	PTHR32227,PTHR32227:SF61		3.2.1.39		GO:0005975,GO:0004553	AT2G01630.1		O-Glycosyl hydrolases family 17 protein
Glyma.16G151900	PF07983,PF00332	PTHR32227,PTHR32227:SF61		3.2.1.39		GO:0005975,GO:0004553	AT1G11820.2		O-Glycosyl hydrolases family 17 protein
Glyma.16G151900	PF07983,PF00332	PTHR32227,PTHR32227:SF61		3.2.1.39		GO:0005975,GO:0004553	AT2G01630.1		O-Glycosyl hydrolases family 17 protein
Glyma.16G151900	PF07983,PF00332	PTHR32227,PTHR32227:SF61		3.2.1.39		GO:0005975,GO:0004553	AT2G01630.1		O-Glycosyl hydrolases family 17 protein
Glyma.16G151900
Glyma.16G152000	PF02365	PTHR31744,PTHR31744:SF10				GO:0006355,GO:0003677	AT5G18270.1	ANAC087	Arabidopsis NAC domain containing protein 87
Glyma.16G152100	PF00249,PF14379	PTHR31499,PTHR31499:SF4					AT3G04030.3		Homeodomain-like superfamily protein
Glyma.16G152200	PF00249,PF14379	PTHR31499,PTHR31499:SF4					AT3G04030.3		Homeodomain-like superfamily protein
Glyma.16G152200	PF02887,PF00224	PTHR11817,PTHR11817:SF34		2.7.1.40	K00873	GO:0030955,GO:0006096,GO:0004743,GO:0000287	AT5G56350.1		Pyruvate kinase family protein
Glyma.16G152300	PF13639	PTHR22763,PTHR22763:SF39		6.3.2.19	K11982	GO:0008270,GO:0005515	AT1G55530.1		RING/U-box superfamily protein
Glyma.16G152400	PF04153,PF04065	PTHR23326,PTHR23326:SF1	KOG2150		K12580	GO:0006355,GO:0005634	AT5G18230.1		transcription regulator NOT2/NOT3/NOT5 family protein
Glyma.16G152500	PF07983,PF00332	PTHR32227,PTHR32227:SF95		3.2.1.39		GO:0005975,GO:0004553	AT1G64760.1		O-Glycosyl hydrolases family 17 protein
Glyma.16G152600	PF00320	PTHR10071,PTHR10071:SF161				GO:0043565,GO:0008270,GO:0006355,GO:0003700	AT4G32890.1	GATA9	GATA transcription factor 9
Glyma.16G152700	PF14432,PF01535,PF13041	PTHR24015,PTHR24015:SF447					AT4G13650.1		Pentatricopeptide repeat (PPR) superfamily protein
Glyma.16G152800		PTHR12794,PTHR12794:SF2				GO:0005681,GO:0000398,GO:0000387	AT1G54385.2		ARM repeat superfamily protein
Glyma.16G152900		PTHR12794,PTHR12794:SF2				GO:0005681,GO:0000398,GO:0000387	AT1G54385.1		ARM repeat superfamily protein
Glyma.16G152900		PTHR11122,PTHR11122:SF15					AT1G55370.2	NDF5	NDH-dependent cyclic electron flow 5
Glyma.16G153000		PTHR19918					AT4G33270.1	CDC20.1	Transducin family protein / WD-40 repeat family protein
Glyma.16G153100	PF00118	PTHR11353,PTHR11353:SF19			K09500	GO:0005524	AT3G03960.1		TCP-1/cpn60 chaperonin family protein
Glyma.16G153200	PF01087	PTHR11943,PTHR11943:SF3	KOG2958		K00965	GO:0008108,GO:0006012,GO:0008270	AT5G18200.1		UTP:galactose-1-phosphate uridylyltransferases;ribose-5-phosphate adenylyltransferases
Glyma.16G153300	PF02812,PF00208	PTHR11606,PTHR11606:SF12		1.4.1.2,1.4.1.3	K00261	GO:0055114,GO:0016491,GO:0006520	AT5G18170.1	GDH1	glutamate dehydrogenase 1
Glyma.16G153400	PF02812,PF00208	PTHR11606,PTHR11606:SF12		1.4.1.2		GO:0055114,GO:0016491,GO:0006520	AT5G18170.1	GDH1	glutamate dehydrogenase 1
Glyma.16G153400		PTHR34132,PTHR34132:SF1					AT5G14602.1
Glyma.16G153500		PTHR34114,PTHR34114:SF2					AT5G56540.1	AGP14,ATAGP14	arabinogalactan protein 14
Glyma.16G153600		PTHR33646,PTHR33646:SF2					AT5G18130.1
Glyma.16G153700	PF01652	PTHR11960,PTHR11960:SF18	KOG1669		K03259	GO:0006413,GO:0005737,GO:0003743,GO:0003723	AT5G18110.1	NCBP	novel cap-binding protein
Glyma.16G153800	PF01652	PTHR11960,PTHR11960:SF18	KOG1669			GO:0006413,GO:0005737,GO:0003743,GO:0003723	AT5G18110.1	NCBP	novel cap-binding protein
Glyma.16G153800	PF01652	PTHR11960,PTHR11960:SF18	KOG1669		K03259	GO:0006413,GO:0005737,GO:0003743,GO:0003723	AT5G18110.1	NCBP	novel cap-binding protein
Glyma.16G153800	PF01652	PTHR11960,PTHR11960:SF18	KOG1669			GO:0006413,GO:0005737,GO:0003743,GO:0003723	AT5G18110.1	NCBP	novel cap-binding protein
Glyma.16G153800	PF00080	PTHR10003,PTHR10003:SF31	KOG0441	1.15.1.1	K04565	GO:0055114,GO:0046872,GO:0006801	AT5G18100.1	CSD3	copper/zinc superoxide dismutase 3
Glyma.16G153900	PF00080	PTHR10003,PTHR10003:SF31	KOG0441	1.15.1.1	K04565	GO:0055114,GO:0046872,GO:0006801	AT5G18100.1	CSD3	copper/zinc superoxide dismutase 3
Glyma.16G153900	PF03953,PF00091	PTHR11588,PTHR11588:SF137			K07374	GO:0003924,GO:0007017,GO:0005874	AT5G19770.1	TUA3	tubulin alpha-3
Glyma.16G154000	PF00847	PTHR31194,PTHR31194:SF0			K09286	GO:0006355,GO:0003700	AT5G19790.1	RAP2.11	related to AP2 11
Glyma.16G154100	PF05739,PF00804	PTHR19957,PTHR19957:SF131	KOG0810		K08486	GO:0005515,GO:0016020	AT3G03800.1	ATSYP131,SYP131	syntaxin of plants 131
Glyma.16G154200	PF01202	PTHR21087,PTHR21087:SF4			K00891		AT3G26900.3	ATSKL1,SKL1	shikimate kinase like 1
Glyma.16G154300	PF01202	PTHR21087,PTHR21087:SF4			K00891		AT3G26900.2	ATSKL1,SKL1	shikimate kinase like 1
Glyma.16G154300	PF01585,PF12457,PF07842	PTHR23329,PTHR23329:SF1			K13103	GO:0003676,GO:0006355,GO:0005634,GO:0003677	AT1G17070.1		GC-rich sequence DNA-binding factor-like protein with Tuftelin interacting domain
Glyma.16G154400	PF01585,PF12457,PF07842	PTHR23329,PTHR23329:SF1			K13103	GO:0003676,GO:0006355,GO:0005634,GO:0003677	AT1G17070.1		GC-rich sequence DNA-binding factor-like protein with Tuftelin interacting domain
Glyma.16G154400	PF01585,PF12457,PF07842	PTHR23329,PTHR23329:SF1			K13103	GO:0003676,GO:0006355,GO:0005634,GO:0003677	AT1G17070.1		GC-rich sequence DNA-binding factor-like protein with Tuftelin interacting domain
Glyma.16G154400	PF01585,PF12457,PF07842	PTHR23329,PTHR23329:SF1			K13103	GO:0003676,GO:0006355,GO:0005634,GO:0003677	AT1G17070.1		GC-rich sequence DNA-binding factor-like protein with Tuftelin interacting domain
Glyma.16G154400	PF01585,PF12457,PF07842	PTHR23329,PTHR23329:SF1			K13103	GO:0003676,GO:0006355,GO:0005634,GO:0003677	AT1G17070.1		GC-rich sequence DNA-binding factor-like protein with Tuftelin interacting domain
Glyma.16G154400
Glyma.16G154500	PF00852	PTHR11929,PTHR11929:SF131	KOG2619	2.4.1.214	K14412	GO:0016020,GO:0008417,GO:0006486	AT1G71990.1	ATFT4,ATFUT13,FT4-M,FUCTC,FUT13	fucosyltransferase 13
Glyma.16G154600	PF01490	PTHR32195,PTHR32195:SF10	KOG1303		K03834		AT5G19500.1		Tryptophan/tyrosine permease
Glyma.16G154700		PTHR33883,PTHR33883:SF1					AT5G14990.1
Glyma.16G154800		PTHR33883,PTHR33883:SF1					AT5G14990.1
Glyma.16G154800		PTHR37263,PTHR37263:SF1
Glyma.16G154900	PF00230	PTHR19139,PTHR19139:SF167	KOG0223		K09872	GO:0016020,GO:0006810,GO:0005215	AT2G37170.1	PIP2;2,PIP2B	plasma membrane intrinsic protein 2
Glyma.16G155000	PF00230	PTHR19139,PTHR19139:SF167	KOG0223		K09872	GO:0016020,GO:0006810,GO:0005215	AT2G37170.1	PIP2;2,PIP2B	plasma membrane intrinsic protein 2
Glyma.16G155100	PF00230	PTHR19139,PTHR19139:SF167	KOG0223			GO:0016020,GO:0006810,GO:0005215	AT2G37170.1	PIP2;2,PIP2B	plasma membrane intrinsic protein 2
Glyma.16G155100	PF00169,PF01852,PF07059	PTHR12136,PTHR12136:SF41				GO:0008289	AT2G28320.1		Pleckstrin homology (PH) and lipid-binding START domains-containing protein
Glyma.16G155200	PF01852,PF07059	PTHR12136,PTHR12136:SF41				GO:0008289	AT2G28320.1		Pleckstrin homology (PH) and lipid-binding START domains-containing protein
Glyma.16G155200	PF01852,PF07059	PTHR12136,PTHR12136:SF41				GO:0008289	AT3G54800.2		Pleckstrin homology (PH) and lipid-binding START domains-containing protein
Glyma.16G155200	PF00320	PTHR10071,PTHR10071:SF194	KOG1601			GO:0043565,GO:0008270,GO:0006355,GO:0003700	AT3G60530.1	GATA4	GATA transcription factor 4
Glyma.16G155300	PF00320	PTHR10071,PTHR10071:SF194	KOG1601			GO:0043565,GO:0008270,GO:0006355,GO:0003700	AT3G60530.1	GATA4	GATA transcription factor 4
Glyma.16G155300	PF00320	PTHR10071,PTHR10071:SF194	KOG1601			GO:0043565,GO:0008270,GO:0006355,GO:0003700	AT3G60530.1	GATA4	GATA transcription factor 4
Glyma.16G155300	PF00583	PTHR23091,PTHR23091:SF208				GO:0008080	AT2G39000.1		Acyl-CoA N-acyltransferases (NAT) superfamily protein
Glyma.16G155400	PF04535	PTHR32021,PTHR32021:SF1					AT2G28370.1		Uncharacterised protein family (UPF0497)
Glyma.16G155500	PF00293,PF05026	PTHR23114	KOG2937	3.6.1.62	K12613	GO:0016787,GO:0030145,GO:0003723	AT5G13570.1	ATDCP2,DCP2,TDT	decapping 2
Glyma.16G155600	PF00293,PF05026	PTHR23114	KOG2937	3.6.1.62	K12613	GO:0016787,GO:0030145,GO:0003723	AT5G13570.1	ATDCP2,DCP2,TDT	decapping 2
Glyma.16G155600	PF00293,PF05026	PTHR23114		3.6.1.62		GO:0016787,GO:0030145,GO:0003723	AT5G13570.1	ATDCP2,DCP2,TDT	decapping 2
Glyma.16G155600	PF00070,PF02852	PTHR22912,PTHR22912:SF106		1.8.1.7	K00383	GO:0055114,GO:0016491,GO:0045454	AT3G24170.3	ATGR1,GR1	glutathione-disulfide reductase
Glyma.16G155700	PF00070,PF02852	PTHR22912,PTHR22912:SF106		1.8.1.7	K00383	GO:0055114,GO:0016491,GO:0045454	AT3G24170.3	ATGR1,GR1	glutathione-disulfide reductase
Glyma.16G155700	PF00070,PF02852	PTHR22912,PTHR22912:SF106		1.8.1.7	K00383	GO:0055114,GO:0016491,GO:0045454	AT3G24170.2	ATGR1,GR1	glutathione-disulfide reductase
Glyma.16G155700	PF04864	PTHR11751,PTHR11751:SF3	KOG0633	2.6.1.9	K00817	GO:0016846	AT5G10330.2	ATHPA1,EMB2196,HISN6A,HPA1	histidinol phosphate aminotransferase 1
Glyma.16G155800	PF04864	PTHR11751,PTHR11751:SF3	KOG0633	2.6.1.9	K00817	GO:0016846	AT5G10330.1	ATHPA1,EMB2196,HISN6A,HPA1	histidinol phosphate aminotransferase 1
Glyma.16G155800	PF04864	PTHR11751,PTHR11751:SF3	KOG0633	2.6.1.9		GO:0016846	AT5G10330.2	ATHPA1,EMB2196,HISN6A,HPA1	histidinol phosphate aminotransferase 1
Glyma.16G155800	PF04864	PTHR11751,PTHR11751:SF3	KOG0633	2.6.1.9		GO:0016846	AT5G10330.1	ATHPA1,EMB2196,HISN6A,HPA1	histidinol phosphate aminotransferase 1
Glyma.16G155800
Glyma.16G155900		PTHR34666,PTHR34666:SF1					AT1G71910.1
Glyma.16G156000	PF00560,PF00069,PF13855	PTHR27000,PTHR27000:SF14	KOG1187	2.7.11.1		GO:0005515,GO:0006468,GO:0005524,GO:0004672	AT1G34420.1		leucine-rich repeat transmembrane protein kinase family protein
Glyma.16G156100	PF00069,PF00560,PF13855	PTHR27000,PTHR27000:SF14	KOG0472	2.7.11.1		GO:0006468,GO:0005524,GO:0004672,GO:0005515	AT1G34420.1		leucine-rich repeat transmembrane protein kinase family protein
Glyma.16G156100	PF00560,PF00069,PF13855	PTHR27000,PTHR27000:SF14	KOG1187	2.7.10.1		GO:0005515,GO:0006468,GO:0005524,GO:0004672	AT1G34420.1		leucine-rich repeat transmembrane protein kinase family protein
Glyma.16G156200	PF01367,PF02739	PTHR10133,PTHR10133:SF38		2.7.7.7		GO:0003824,GO:0003677	AT1G34380.2		5\'-3\' exonuclease family protein
Glyma.16G156300	PF02739	PTHR10133,PTHR10133:SF38		2.7.7.7		GO:0003677	AT1G34380.2		5\'-3\' exonuclease family protein
Glyma.16G156300	PF01367,PF02739	PTHR10133,PTHR10133:SF38		2.7.7.7		GO:0003824,GO:0003677	AT1G34380.2		5\'-3\' exonuclease family protein
Glyma.16G156300		PTHR10593,PTHR10593:SF27					AT1G34370.2	STOP1	C2H2 and C2HC zinc fingers superfamily protein
Glyma.16G156400	PF00498,PF13638	PTHR22593,PTHR22593:SF8				GO:0005515	AT1G34355.1	ATPS1,PS1	forkhead-associated (FHA) domain-containing protein
Glyma.16G156500	PF00498,PF13638	PTHR22593,PTHR22593:SF8				GO:0005515	AT1G34355.1	ATPS1,PS1	forkhead-associated (FHA) domain-containing protein
Glyma.16G156500	PF14770	PTHR22593					AT1G34350.1
Glyma.16G156600	PF03514	PTHR31636,PTHR31636:SF19					AT3G54220.1	SCR,SGR1	GRAS family transcription factor
Glyma.16G156700		PTHR19432,PTHR19432:SF38	KOG0637		K15378		AT1G22710.1	ATSUC2,SUC2,SUT1	sucrose-proton symporter 2
Glyma.16G156800	PF13347	PTHR19432,PTHR19432:SF38	KOG0637				AT1G66570.1	ATSUC7,SUC7	sucrose-proton symporter 7
Glyma.16G156800	PF13347	PTHR19432,PTHR19432:SF38			K15378		AT1G22710.1	ATSUC2,SUC2,SUT1	sucrose-proton symporter 2
Glyma.16G156900	PF00076,PF08777,PF05383	PTHR22792,PTHR22792:SF64	KOG4213		K11090	GO:0003676,GO:0003723	AT4G32720.2	AtLa1,La1	La protein 1
Glyma.17G190500	PF00076,PF08777,PF05383	PTHR22792,PTHR22792:SF64	KOG4213			GO:0003676,GO:0003723	AT4G32720.1	AtLa1,La1	La protein 1
Glyma.17G190500	PF12776	PTHR31704,PTHR31704:SF28					AT2G29880.1
Glyma.17G190600	PF14372	PTHR23272,PTHR23272:SF52				GO:0003677	AT3G42170.1		BED zinc finger ;hAT family dimerisation domain
Glyma.17G190700	PF01063	PTHR11825,PTHR11825:SF48	KOG0975	4.1.3.38	K18482	GO:0008152,GO:0003824	AT5G57850.1		D-aminoacid aminotransferase-like PLP-dependent enzymes superfamily protein
Glyma.17G190800	PF00249	PTHR10641,PTHR10641:SF599	KOG0048				AT4G32730.2	ATMYB3R-1,ATMYB3R1,MYB3R-1,MYB3R1,PC-MYB1	Homeodomain-like protein
Glyma.17G190900	PF03127,PF00790	PTHR13856,PTHR13856:SF78	KOG1087			GO:0006886,GO:0005622	AT4G32760.1		ENTH/VHS/GAT family protein
Glyma.17G191000	PF03127	PTHR13856,PTHR13856:SF78	KOG1087			GO:0006886,GO:0005622	AT4G32760.1		ENTH/VHS/GAT family protein
Glyma.17G191000	PF03127,PF00790	PTHR13856,PTHR13856:SF78	KOG1087			GO:0006886,GO:0005622	AT4G32760.1		ENTH/VHS/GAT family protein
Glyma.17G191000	PF00076,PF14111	PTHR23147,PTHR23147:SF4				GO:0003676
Glyma.17G191100	PF14214,PF05970	PTHR10492,PTHR10492:SF26	KOG0987	3.6.4.12		GO:0006281,GO:0003678,GO:0000723	AT3G51690.1		PIF1 helicase
Glyma.17G191200	PF03169	PTHR31645,PTHR31645:SF8				GO:0055085	AT5G53550.2	ATYSL3,YSL3	YELLOW STRIPE like 3
Glyma.17G191300	PF03169	PTHR31645,PTHR31645:SF8				GO:0055085	AT5G53550.1	ATYSL3,YSL3	YELLOW STRIPE like 3
Glyma.17G191300	PF05970	PTHR10492		3.6.4.12		GO:0006281,GO:0003678,GO:0000723	AT3G51690.1		PIF1 helicase
Glyma.17G191400		PTHR33924,PTHR33924:SF1					AT5G05240.1		Uncharacterised conserved protein (UCP030365)
Glyma.17G191500
Glyma.17G191600
Glyma.17G191700
Glyma.17G191800	PF12394,PF05057	PTHR12482,PTHR12482:SF5	KOG2205				AT1G58350.2	ZW18	Putative serine esterase family protein
Glyma.17G191900	PF12394,PF05057	PTHR12482,PTHR12482:SF5	KOG2205				AT1G58350.2	ZW18	Putative serine esterase family protein
Glyma.17G191900	PF12394,PF05057	PTHR12482,PTHR12482:SF5	KOG2205				AT1G58350.1	ZW18	Putative serine esterase family protein
Glyma.17G191900	PF12394,PF05057	PTHR12482,PTHR12482:SF5	KOG2205				AT1G58350.1	ZW18	Putative serine esterase family protein
Glyma.17G191900	PF12394,PF05057	PTHR12482,PTHR12482:SF5	KOG2205				AT1G58350.2	ZW18	Putative serine esterase family protein
Glyma.17G191900	PF12394,PF05057	PTHR12482,PTHR12482:SF5	KOG2205				AT1G58350.2	ZW18	Putative serine esterase family protein
Glyma.17G191900	PF12394,PF05057	PTHR12482,PTHR12482:SF5	KOG2205				AT1G58350.2	ZW18	Putative serine esterase family protein
Glyma.17G191900	PF12394,PF05057	PTHR12482,PTHR12482:SF5	KOG2205				AT1G58350.1	ZW18	Putative serine esterase family protein
Glyma.17G191900	PF01490	PTHR22950,PTHR22950:SF278	KOG1303				AT5G49630.1	AAP6	amino acid permease 6
Glyma.17G192000	PF03386	PTHR33605,PTHR33605:SF3					AT5G25940.1		early nodulin-related
Glyma.17G192100	PF03386	PTHR33605,PTHR33605:SF3					AT5G25940.1		early nodulin-related
Glyma.17G192100	PF03386	PTHR33605,PTHR33605:SF3					AT5G25940.1		early nodulin-related
Glyma.17G192100	PF04539,PF04542,PF04545	PTHR30603,PTHR30603:SF13			K03093	GO:0016987,GO:0006355,GO:0006352,GO:0003700,GO:0003677	AT3G53920.1	SIG3,SIGC	RNApolymerase sigma-subunit C
Glyma.17G192200	PF04539,PF04542,PF04545	PTHR30603,PTHR30603:SF13				GO:0016987,GO:0006355,GO:0006352,GO:0003700,GO:0003677	AT3G53920.1	SIG3,SIGC	RNApolymerase sigma-subunit C
Glyma.17G192200	PF04542	PTHR30603,PTHR30603:SF13				GO:0016987,GO:0006355,GO:0006352,GO:0003700,GO:0003677	AT3G53920.1	SIG3,SIGC	RNApolymerase sigma-subunit C
Glyma.17G192200	PF04542	PTHR30603,PTHR30603:SF13				GO:0016987,GO:0006355,GO:0006352,GO:0003700,GO:0003677	AT3G53920.1	SIG3,SIGC	RNApolymerase sigma-subunit C
Glyma.17G192200	PF04542	PTHR30603,PTHR30603:SF13				GO:0016987,GO:0006355,GO:0006352,GO:0003700,GO:0003677	AT3G53920.1	SIG3,SIGC	RNApolymerase sigma-subunit C
Glyma.17G192200	PF08282,PF02130	PTHR10000,PTHR10000:SF8		3.1.3.23,3.1.3.74		GO:0006364,GO:0004222	AT2G25870.1		haloacid dehalogenase-like hydrolase family protein
Glyma.17G192300	PF03372	PTHR23227,PTHR23227:SF41
Glyma.17G192400	PF01490	PTHR22950,PTHR22950:SF208	KOG1303				AT1G10010.1	AAP8,ATAAP8	amino acid permease 8
Glyma.17G192500		PTHR24006,PTHR24006:SF501					AT2G25490.1	EBF1,FBL6	EIN3-binding F box protein 1
Glyma.17G192600		PTHR27001,PTHR27001:SF88		2.7.10.2			AT1G52540.1		Protein kinase superfamily protein
Glyma.17G176000	PF00685	PTHR32175,PTHR32175:SF6				GO:0008146	AT3G50620.1		P-loop containing nucleoside triphosphate hydrolases superfamily protein
Glyma.17G176100	PF00685	PTHR32175,PTHR32175:SF6				GO:0008146	AT3G50620.1		P-loop containing nucleoside triphosphate hydrolases superfamily protein
Glyma.17G176100	PF00685	PTHR32175,PTHR32175:SF6				GO:0008146	AT3G50620.1		P-loop containing nucleoside triphosphate hydrolases superfamily protein
Glyma.17G176100	PF13561	PTHR24322,PTHR24322:SF315	KOG1014				AT3G50560.1		NAD(P)-binding Rossmann-fold superfamily protein
Glyma.17G176200	PF13561	PTHR24322,PTHR24322:SF315	KOG1014				AT3G50560.1		NAD(P)-binding Rossmann-fold superfamily protein
Glyma.17G176200	PF13561	PTHR24322,PTHR24322:SF315	KOG1200	1.1.1.102			AT3G50560.1		NAD(P)-binding Rossmann-fold superfamily protein
Glyma.17G176200	PF00106	PTHR24322,PTHR24322:SF315				GO:0016491,GO:0008152	AT3G50560.1		NAD(P)-binding Rossmann-fold superfamily protein
Glyma.17G176200	PF00106	PTHR24322,PTHR24322:SF315				GO:0016491,GO:0008152	AT3G50560.1		NAD(P)-binding Rossmann-fold superfamily protein
Glyma.17G176200	PF13561	PTHR24322,PTHR24322:SF315	KOG1200	1.1.1.102			AT3G50560.1		NAD(P)-binding Rossmann-fold superfamily protein
Glyma.17G176200		PTHR19878,PTHR19878:SF4					AT3G50590.1		Transducin/WD40 repeat-like superfamily protein
Glyma.17G176300	PF14389,PF04784	PTHR23054,PTHR23054:SF19					AT4G37080.2		Protein of unknown function, DUF547
Glyma.17G176400	PF14389,PF04784	PTHR23054,PTHR23054:SF19					AT4G37080.2		Protein of unknown function, DUF547
Glyma.17G176400	PF14389,PF04784	PTHR23054,PTHR23054:SF19					AT4G37080.2		Protein of unknown function, DUF547
Glyma.17G176400	PF14389,PF04784	PTHR23054,PTHR23054:SF19					AT4G37080.2		Protein of unknown function, DUF547
Glyma.17G176400		PTHR33348,PTHR33348:SF4					AT2G23440.1
Glyma.17G176500	PF00125	PTHR11426	KOG1745			GO:0003677,GO:0000786	AT5G10400.1		Histone superfamily protein
Glyma.17G176600		PTHR33348,PTHR33348:SF5					AT2G23440.1
Glyma.17G176700		PTHR33348,PTHR33348:SF1					AT3G50610.1
Glyma.17G176800							AT2G23440.1
Glyma.17G176900		PTHR33348,PTHR33348:SF1					AT3G50610.1
Glyma.17G177000	PF00225	PTHR24115,PTHR24115:SF339	KOG0239	3.6.4.5		GO:0008017,GO:0007018,GO:0005524,GO:0003777,GO:0005871	AT1G72250.2		Di-glucose binding protein with Kinesin motor domain
Glyma.17G177100		PTHR33348,PTHR33348:SF1
Glyma.17G177200		PTHR33348,PTHR33348:SF1					AT5G66816.1
Glyma.17G177300	PF12776	PTHR31704,PTHR31704:SF9					AT3G11290.1
Glyma.17G177400
Glyma.17G177500	PF00515,PF00160	PTHR11071,PTHR11071:SF259	KOG0546	5.2.1.8	K05864	GO:0005515,GO:0006457,GO:0003755,GO:0000413	AT2G15790.1	CYP40,SQN	peptidyl-prolyl cis-trans isomerase / cyclophilin-40 (CYP40) / rotamase
Glyma.17G177600	PF00515,PF00160	PTHR11071,PTHR11071:SF259	KOG0546	5.2.1.8		GO:0005515,GO:0006457,GO:0003755,GO:0000413	AT2G15790.1	CYP40,SQN	peptidyl-prolyl cis-trans isomerase / cyclophilin-40 (CYP40) / rotamase
Glyma.17G177600
Glyma.17G177700	PF00141	PTHR31388,PTHR31388:SF34		1.11.1.7	K00430	GO:0055114,GO:0020037,GO:0006979,GO:0004601	AT1G49570.1		Peroxidase superfamily protein
Glyma.17G177800	PF14531	PTHR24361,PTHR24361:SF300	KOG0198	2.7.11.25			AT5G66850.1	MAPKKK5	mitogen-activated protein kinase kinase kinase 5
Glyma.17G177900	PF00069	PTHR24361,PTHR24361:SF300	KOG0198	2.7.11.25		GO:0006468,GO:0005524,GO:0004672	AT5G66850.1	MAPKKK5	mitogen-activated protein kinase kinase kinase 5
Glyma.17G177900	PF14693	PTHR33284,PTHR33284:SF2			K02897		AT5G66860.1		Ribosomal protein L25/Gln-tRNA synthetase, anti-codon-binding domain
Glyma.17G178000		PTHR33240,PTHR33240:SF1
Glyma.17G178100	PF03195	PTHR31301,PTHR31301:SF13					AT2G23660.1	LBD10	LOB domain-containing protein 10
Glyma.17G178200	PF14226,PF03171	PTHR10209,PTHR10209:SF177	KOG0143	1.14.11.13		GO:0055114,GO:0016491	AT4G21200.1	ATGA2OX8,GA2OX8	gibberellin 2-oxidase 8
Glyma.17G178300	PF14226,PF03171	PTHR10209,PTHR10209:SF177	KOG0143	1.14.11.13		GO:0055114,GO:0016491	AT4G21200.1	ATGA2OX8,GA2OX8	gibberellin 2-oxidase 8
Glyma.17G178300	PF05970	PTHR10492		3.6.4.12		GO:0006281,GO:0003678,GO:0000723	AT5G28780.1		PIF1 helicase
Glyma.17G178400	PF00249	PTHR31003,PTHR31003:SF2					AT4G37180.1		Homeodomain-like superfamily protein
Glyma.17G178500	PF00249	PTHR31003,PTHR31003:SF2					AT4G37180.1		Homeodomain-like superfamily protein
Glyma.17G178500	PF00249	PTHR31003,PTHR31003:SF2					AT4G37180.1		Homeodomain-like superfamily protein
Glyma.17G178500	PF00249	PTHR31003,PTHR31003:SF2					AT4G37180.1		Homeodomain-like superfamily protein
Glyma.17G178500
Glyma.17G178600	PF08263	PTHR11200,PTHR11200:SF128		3.1.3.56			AT1G71710.1		DNAse I-like superfamily protein
Glyma.17G178700	PF00069	PTHR24343,PTHR24343:SF160	KOG0583	2.7.11.1	K14498	GO:0006468,GO:0005524,GO:0004672	AT5G66880.1	SNRK2-3,SNRK2.3,SRK2I	sucrose nonfermenting 1(SNF1)-related protein kinase 2.3
Glyma.17G178800	PF07714	PTHR24343,PTHR24343:SF160	KOG0583	2.7.11.1		GO:0006468,GO:0004672	AT5G66880.1	SNRK2-3,SNRK2.3,SRK2I	sucrose nonfermenting 1(SNF1)-related protein kinase 2.3
Glyma.17G178800	PF07714	PTHR24343,PTHR24343:SF160	KOG0583	2.7.11.1		GO:0006468,GO:0004672	AT5G66880.1	SNRK2-3,SNRK2.3,SRK2I	sucrose nonfermenting 1(SNF1)-related protein kinase 2.3
Glyma.17G178800	PF00069	PTHR24343,PTHR24343:SF160	KOG0583	2.7.11.1		GO:0006468,GO:0005524,GO:0004672	AT5G66880.1	SNRK2-3,SNRK2.3,SRK2I	sucrose nonfermenting 1(SNF1)-related protein kinase 2.3
Glyma.17G178800		PTHR33781,PTHR33781:SF1					AT5G04190.1	PKS4	phytochrome kinase substrate 4
Glyma.19G067500
Glyma.19G067600
Glyma.19G067700	PF01230	PTHR23089,PTHR23089:SF12	KOG3275		K02503		AT3G56490.1	HINT1,HIT3	HIS triad family protein 3
Glyma.19G067800	PF00170	PTHR22952,PTHR22952:SF192			K14432	GO:0043565,GO:0006355,GO:0003700	AT3G56850.1	AREB3,DPBF3	ABA-responsive element binding protein 3
Glyma.19G067900	PF01107	PTHR33054,PTHR33054:SF7
Glyma.19G068000		PTHR33054,PTHR33054:SF3
Glyma.19G068100		PTHR33054,PTHR33054:SF3
Glyma.19G068200	PF00646,PF14299	PTHR32278,PTHR32278:SF2				GO:0005515	AT2G02240.1	MEE66	F-box family protein
Glyma.20G220300	PF07714	PTHR27001,PTHR27001:SF100	KOG1187	2.7.11.1		GO:0006468,GO:0004672	AT3G07070.1		Protein kinase superfamily protein
Glyma.20G220400		PTHR33699,PTHR33699:SF3					AT5G18310.1
Glyma.20G220500	PF04564	PTHR23315,PTHR23315:SF80		6.3.2.19		GO:0016567,GO:0004842	AT3G07360.1	ATPUB9,PUB9	plant U-box 9
Glyma.20G220600	PF01535	PTHR24015,PTHR24015:SF139					AT5G37570.1		Pentatricopeptide repeat (PPR-like) superfamily protein
Glyma.20G220700	PF01535	PTHR24015,PTHR24015:SF139					AT5G37570.1		Pentatricopeptide repeat (PPR-like) superfamily protein
Glyma.20G220700	PF01535	PTHR24015,PTHR24015:SF139					AT5G37570.1		Pentatricopeptide repeat (PPR-like) superfamily protein
Glyma.20G220700	PF01535	PTHR24015,PTHR24015:SF139					AT5G37570.1		Pentatricopeptide repeat (PPR-like) superfamily protein
Glyma.20G220700	PF07883	PTHR31238,PTHR31238:SF42					AT3G05950.1		RmlC-like cupins superfamily protein
Glyma.20G220800	PF07883	PTHR31238,PTHR31238:SF42					AT3G05950.1		RmlC-like cupins superfamily protein
Glyma.20G220900	PF13424,PF13414,PF13844	PTHR23083,PTHR23083:SF364		2.4.1.255	K09667		AT3G04240.1	SEC	Tetratricopeptide repeat (TPR)-like superfamily protein
Glyma.20G221000	PF13424,PF13414,PF13844	PTHR23083,PTHR23083:SF364		2.4.1.255			AT3G04240.1	SEC	Tetratricopeptide repeat (TPR)-like superfamily protein
Glyma.20G221000	PF02037,PF13812	PTHR31407,PTHR31407:SF5					AT3G04260.1	PTAC3	plastid transcriptionally active 3
Glyma.20G221100	PF02037,PF13812	PTHR31407,PTHR31407:SF5					AT3G04260.1	PTAC3	plastid transcriptionally active 3
Glyma.20G221100	PF02037,PF13812	PTHR31407,PTHR31407:SF5					AT3G04260.1	PTAC3	plastid transcriptionally active 3
Glyma.20G221100	PF00657	PTHR22835,PTHR22835:SF160		3.1.1.3		GO:0016788	AT5G33370.1		GDSL-like Lipase/Acylhydrolase superfamily protein
Glyma.20G221200	PF14365,PF03080	PTHR31589,PTHR31589:SF4					AT5G18460.1		Protein of Unknown Function (DUF239)
Glyma.20G221300	PF14365,PF03080	PTHR31589,PTHR31589:SF4					AT5G18460.1		Protein of Unknown Function (DUF239)
Glyma.20G221300	PF00909	PTHR11730,PTHR11730:SF39	KOG0682			GO:0016020,GO:0015696,GO:0008519,GO:0072488	AT1G64780.1	AMT1;2,ATAMT1;2	ammonium transporter 1;2
Glyma.20G221400	PF11282	PTHR36802,PTHR36802:SF1					AT5G37360.1
Glyma.20G221500	PF10447	PTHR12686,PTHR12686:SF8				GO:0003723,GO:0000178	AT5G38890.1		Nucleic acid-binding, OB-fold-like protein
Glyma.20G221600	PF10447	PTHR12686,PTHR12686:SF8				GO:0003723,GO:0000178	AT5G38890.1		Nucleic acid-binding, OB-fold-like protein
Glyma.20G221600	PF05899	PTHR33271,PTHR33271:SF4					AT3G04300.1		RmlC-like cupins superfamily protein
Glyma.20G221700	PF01590,PF00072	PTHR24423,PTHR24423:SF530	KOG0519	2.7.11.1	K14509	GO:0005515,GO:0000160	AT3G04580.2	EIN4	Signal transduction histidine kinase, hybrid-type, ethylene sensor
Glyma.20G221800	PF00512,PF01590,PF00072	PTHR24423,PTHR24423:SF530	KOG0519	2.7.11.1		GO:0007165,GO:0000155,GO:0005515,GO:0000160	AT3G04580.2	EIN4	Signal transduction histidine kinase, hybrid-type, ethylene sensor
Glyma.20G221800		PTHR22809		2.1.1.268			AT1G54650.2		Methyltransferase family protein
Glyma.20G221900	PF03479	PTHR31100,PTHR31100:SF3					AT4G14465.1	AHL20	AT-hook motif nuclear-localized protein 20
Glyma.20G222000		PTHR36749,PTHR36749:SF1					AT3G04560.1
Glyma.20G222100		PTHR36749,PTHR36749:SF1					AT3G04560.1
Glyma.20G222100		PTHR35299,PTHR35299:SF2					AT3G04550.1
Glyma.20G222200	PF04266	PTHR12963					AT2G20410.1		RNA-binding ASCH domain protein
Glyma.20G222300	PF04266	PTHR12963					AT2G20410.1		RNA-binding ASCH domain protein
Glyma.20G222300	PF14392,PF14111	PTHR31286,PTHR31286:SF7					AT2G01050.1		zinc ion binding;nucleic acid binding
Glyma.20G222400	PF16891,PF00149	PTHR11668,PTHR11668:SF259		3.1.3.16	K06269	GO:0016787	AT2G39840.1	TOPP4	type one serine/threonine protein phosphatase 4
Glyma.20G222500	PF07714	PTHR24349,PTHR24349:SF76	KOG0032	2.7.11.1		GO:0006468,GO:0004672	AT1G08650.1	ATPPCK1,PPCK1	phosphoenolpyruvate carboxylase kinase 1
Glyma.20G222600
